# Supplementary material for: Construct ceRNA Network and Risk Model of Breast Cancer Using Machine Learning Methods under the Mechanism of Cuproptosis
Source: MDPI journal article supplement (doi:10.3390/diagnostics13061203), 2023-03-22
Supplement: s1 [file s1]

Cuproptosis

lncRNA

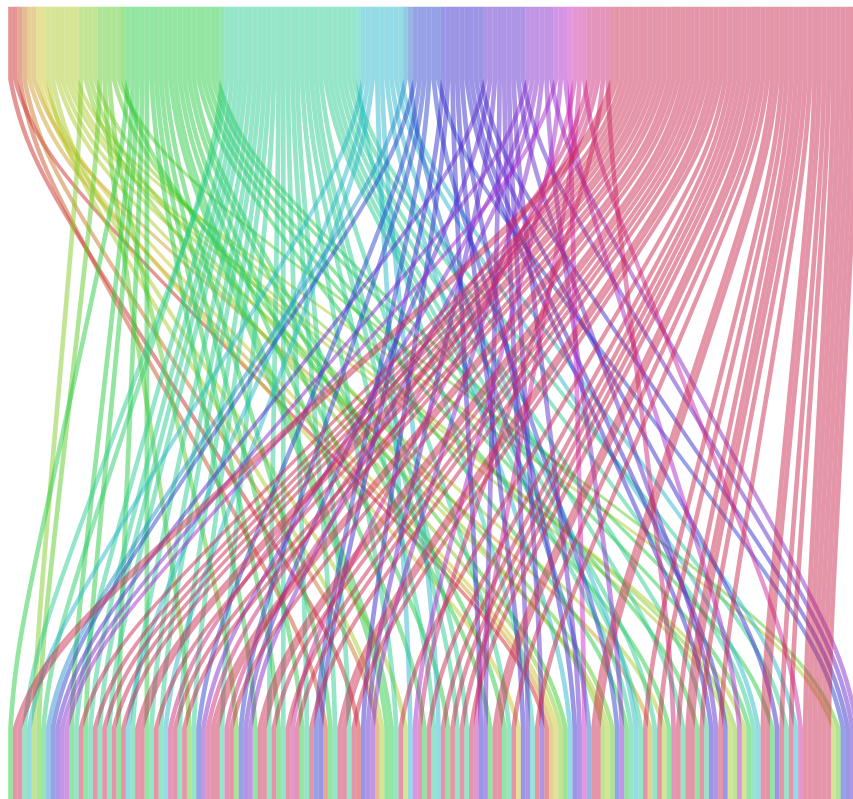

Cuproptosis

|        |         |
|--------|---------|
| ATOX1  | MITD1   |
| ATP7A  | MT2A    |
| BECN1  | MTF1    |
| CCDC22 | NDUFA1  |
| CCS    | NDUFA2  |
| CDKN2A | NDUFB1  |
| COX19  | NDUFB2  |
| COX7B  | PDHA1   |
| DLAT   | PDHB    |
| GLS    | PIH1D2  |
| HSF1   | SLC22A5 |
| LIAS   | SLC31A2 |
| LIPT2  |         |
