# Supplementary material for: Construct ceRNA Network and Risk Model of Breast Cancer Using Machine Learning Methods under the Mechanism of Cuproptosis
Source: MDPI journal article supplement (doi:10.3390/diagnostics13061203), 2023-03-22
Supplement: s1 [file s1]

Table S1 Source of datasets and related information

| Datasets  | Source | Platform | Sample | Normal | Tumor |
|-----------|--------|----------|--------|--------|-------|
| GSE54002  | GEO    | GPL570   | breast | 16     | 417   |
| GSE29431  | GEO    | GPL570   | breast | 12     | 54    |
| GSE42568  | GEO    | GPL570   | breast | 17     | 104   |
| GSE139038 | GEO    | GPL27630 | breast | 24     | 41    |
| GSE205185 | GEO    | GPL21185 | breast | 5      | 17    |
