# Supplementary material for: Construct ceRNA Network and Risk Model of Breast Cancer Using Machine Learning Methods under the Mechanism of Cuproptosis
Source: MDPI journal article supplement (doi:10.3390/diagnostics13061203), 2023-03-22
Supplement: s1 [file s1]

Table S3 Compared with other prognostic models constructed using CRLs

| References | Data source | The number of CRLs used to build the model | The AUC of ROC for all samples | The AUC of ROC for training samples | The AUC of ROC for test samples |
|------------|-------------|--------------------------------------------|--------------------------------|-------------------------------------|---------------------------------|
| [13]       | TCGA        | 11                                         | AUC at 1 year: 0.766           | AUC at 1 year: 0.766                | AUC at 1 year: 0.686            |
|            |             |                                            | AUC at 3 years: 0.734          | AUC at 3 years: 0.734               | AUC at 3 years: 0.687           |
|            |             |                                            | AUC at 5 years: 0.736          | AUC at 5 years: 0.736               | AUC at 5 years: 0.686           |
| [14]       | TCGA        | 37                                         | AUC at 1 year: 0.766           | -                                   | -                               |
|            |             |                                            | AUC at 3 years: 0.808          | -                                   | -                               |
|            |             |                                            | AUC at 5 years: 0.745          | -                                   | -                               |
| This study | TCGA        | 4                                          | AUC at 1 year: 0.721           | AUC at 1 year: 0.740                | AUC at 1 year: 0.697            |
|            |             |                                            | AUC at 3 years: 0.695          | AUC at 3 years: 0.776               | AUC at 3 years: 0.604           |
|            |             |                                            | AUC at 5 years: 0.633          | AUC at 5 years: 0.715               | AUC at 5 years: 0.550           |

Notes: The '-' in the table indicates that no experimental data was obtained in the corresponding study.
