# Supplementary material for: Construct ceRNA Network and Risk Model of Breast Cancer Using Machine Learning Methods under the Mechanism of Cuproptosis
Source: MDPI journal article supplement (doi:10.3390/diagnostics13061203), 2023-03-22
Supplement: s1 [file s1]

Table S3 Four CRLs and their corresponding regression coefficients

| CRL        | regression coefficient |
|------------|------------------------|
| C9orf163   | 1.8365139936957        |
| PHC2-AS1   | 2.29853199668974       |
| AC087741.1 | 0.950421008877884      |
| AL109824.1 | 0.601632220939569      |
