# Supplementary material for: Construct ceRNA Network and Risk Model of Breast Cancer Using Machine Learning Methods under the Mechanism of Cuproptosis
Source: MDPI journal article supplement (doi:10.3390/diagnostics13061203), 2023-03-22
Supplement: s1 [file s1]

Table S2 Classification and description of references

| References | Description                                                                                                                                                                           |
|------------|---------------------------------------------------------------------------------------------------------------------------------------------------------------------------------------|
| [13-14]    | There are only two published papers on breast cancer in which cuproptosis-related lncRNAs were used to construct prognostic models. It shows that our risk model has certain novelty. |
| [20-26]    | Previous studies were used to prove the role of CRCGs screened in breast cancer.                                                                                                      |
| [27]       | The functions and pathways of 14 CRCGs are mainly enriched in breast cancer.                                                                                                          |
| [28-31]    | To prove the significance of the results of immune infiltration analysis on the occurrence and development of breast cancer.                                                          |
| [33-39]    | Citing previous studies, the important role of our ceRNA network in breast cancer was expounded.                                                                                      |
| [40-41]    | The real-life use cases of the risk prognosis model                                                                                                                                   |
| [42-48]    | Of the 50 potentially sensitive drugs, examples include drugs that have been reported to have some effect on breast cancer.                                                           |
