# Supplementary figures and images for: Construct ceRNA Network and Risk Model of Breast Cancer Using Machine Learning Methods under the Mechanism of Cuproptosis
Source: MDPI journal article supplement (doi:10.3390/diagnostics13061203), 2023-03-22

HG-5-113-01 sensitivity (IC50)

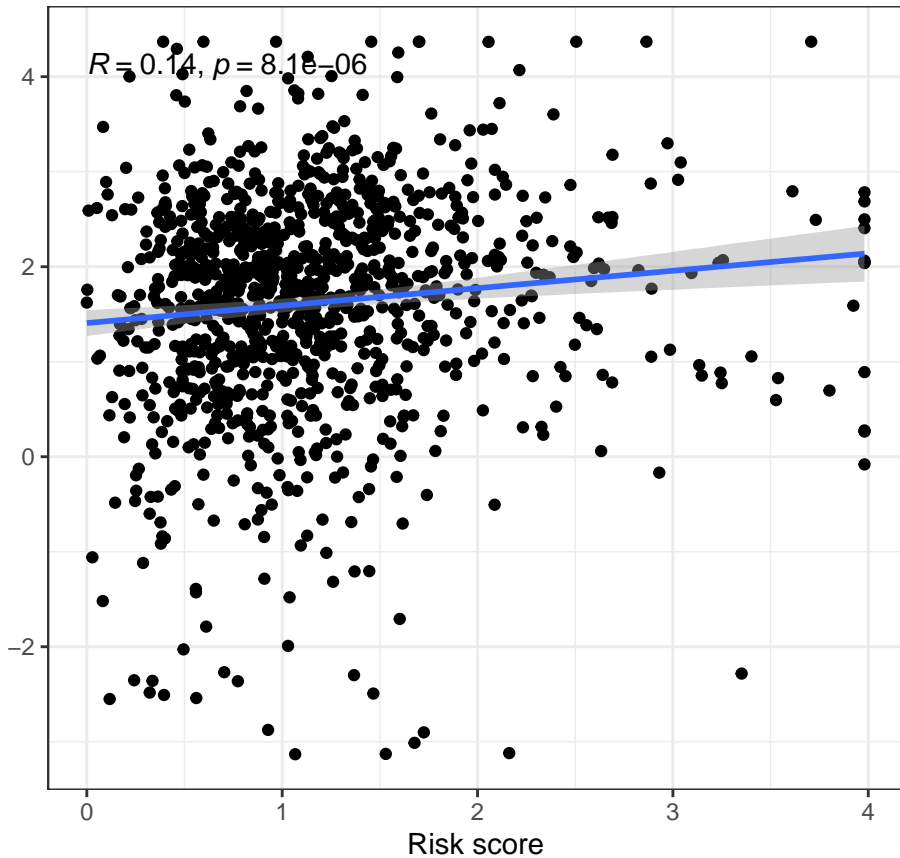

Supplement: s1 [file s1]

Risk  low  high

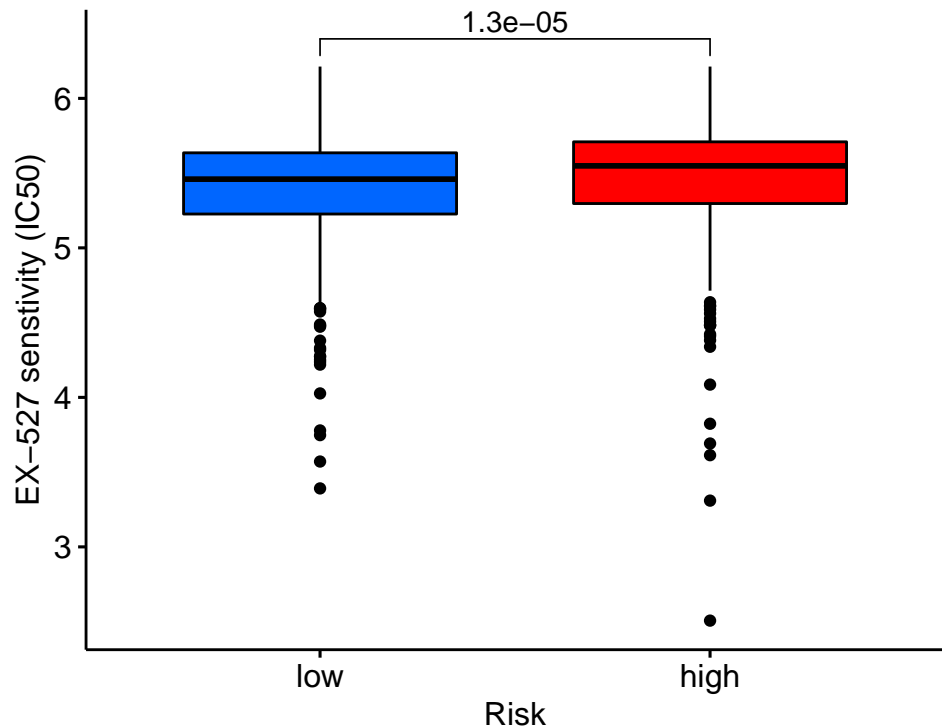

Supplement: s1 [file s1]

Risk  low  high

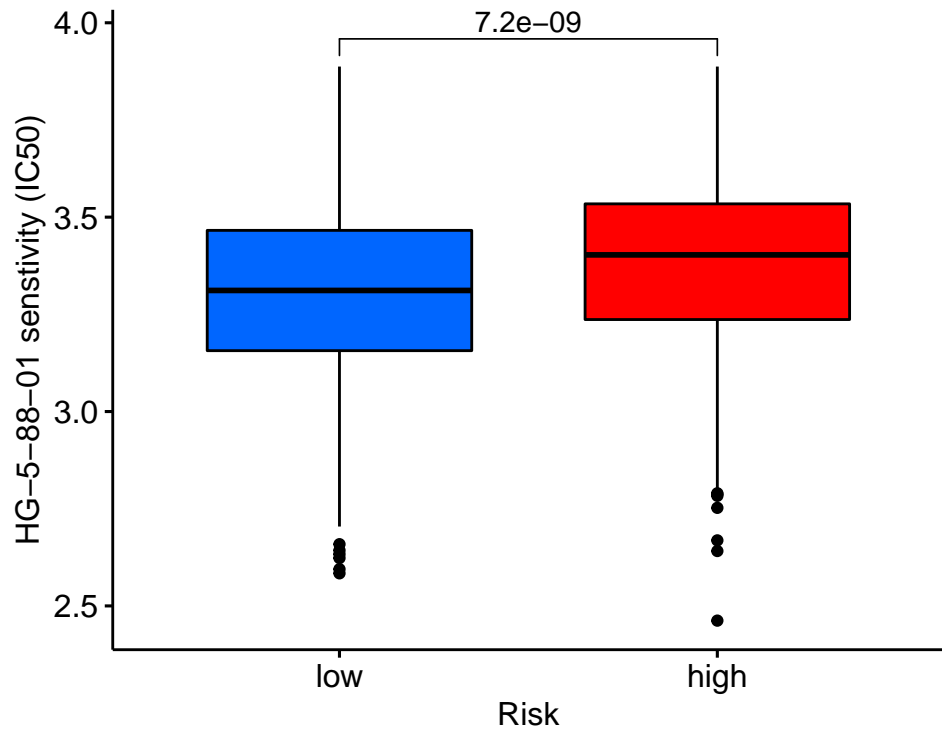

Supplement: s1 [file s1]

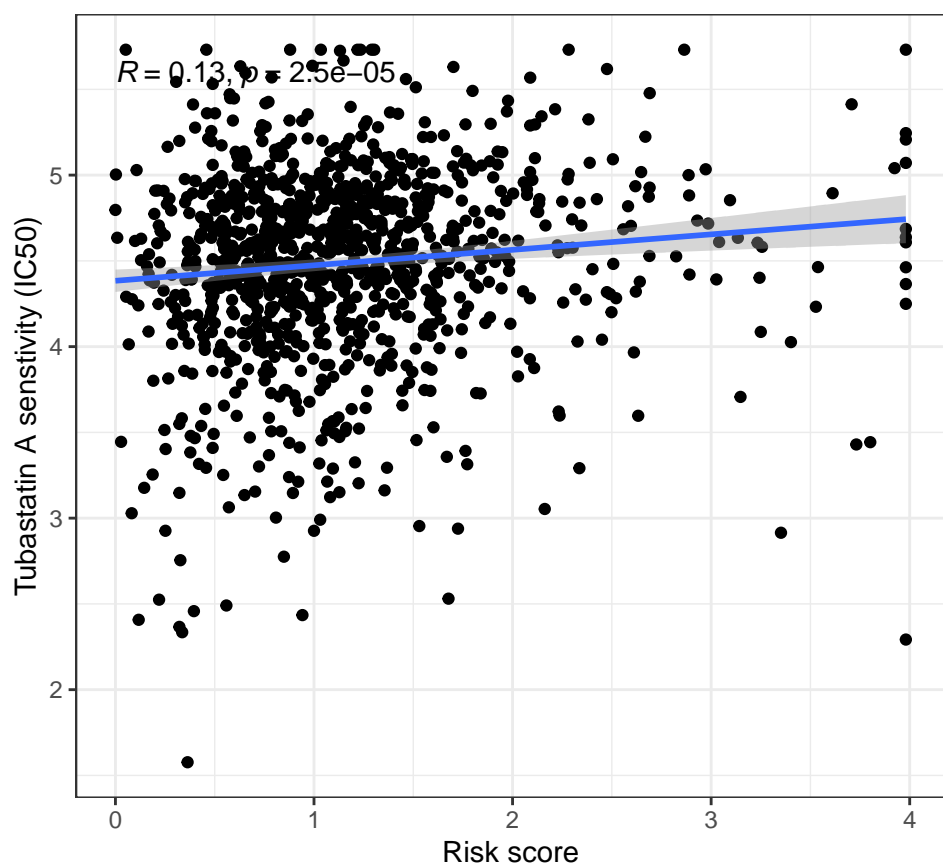

Supplement: s1 [file s1]

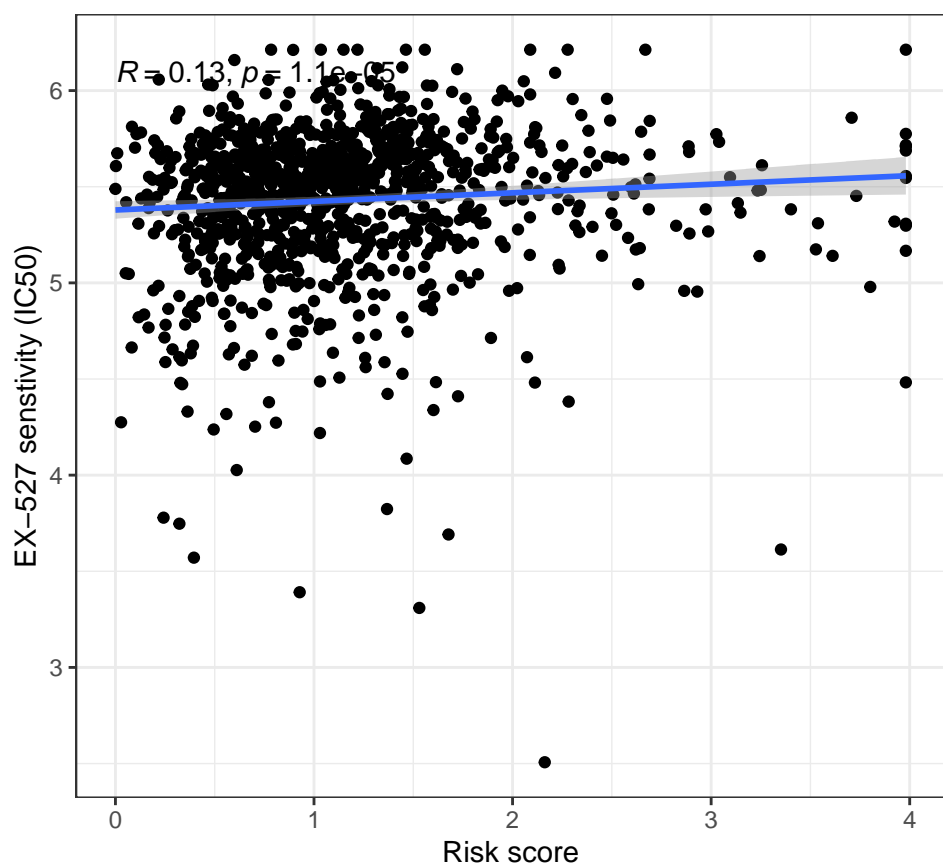

Supplement: s1 [file s1]

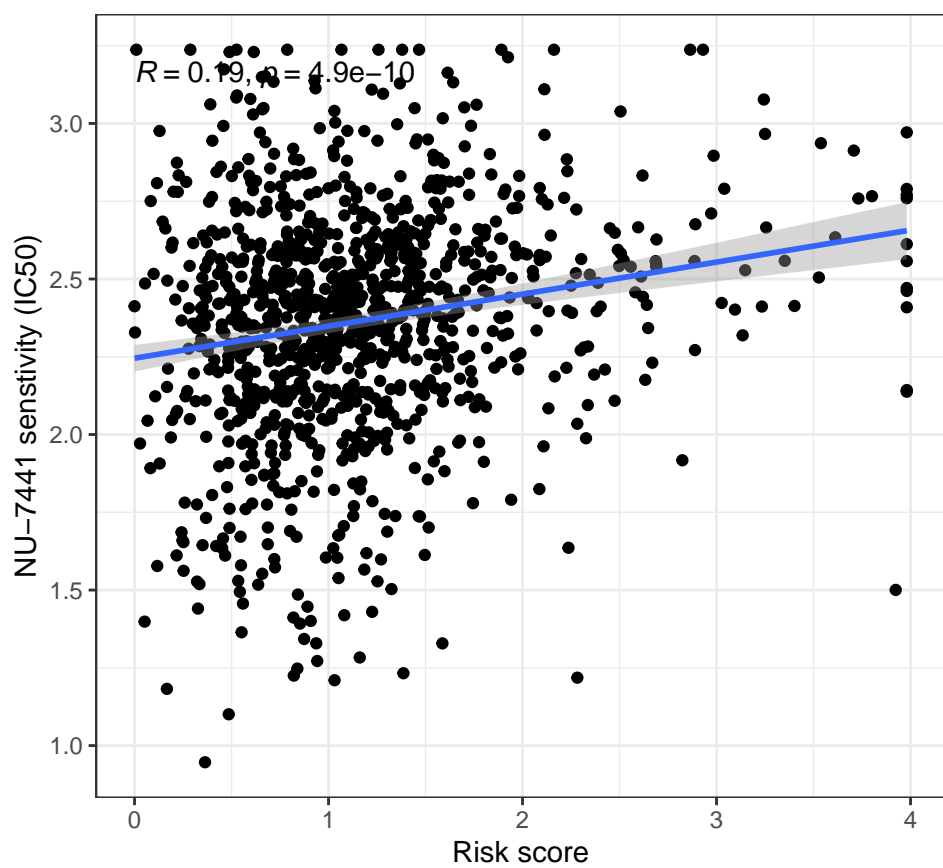

Supplement: s1 [file s1]

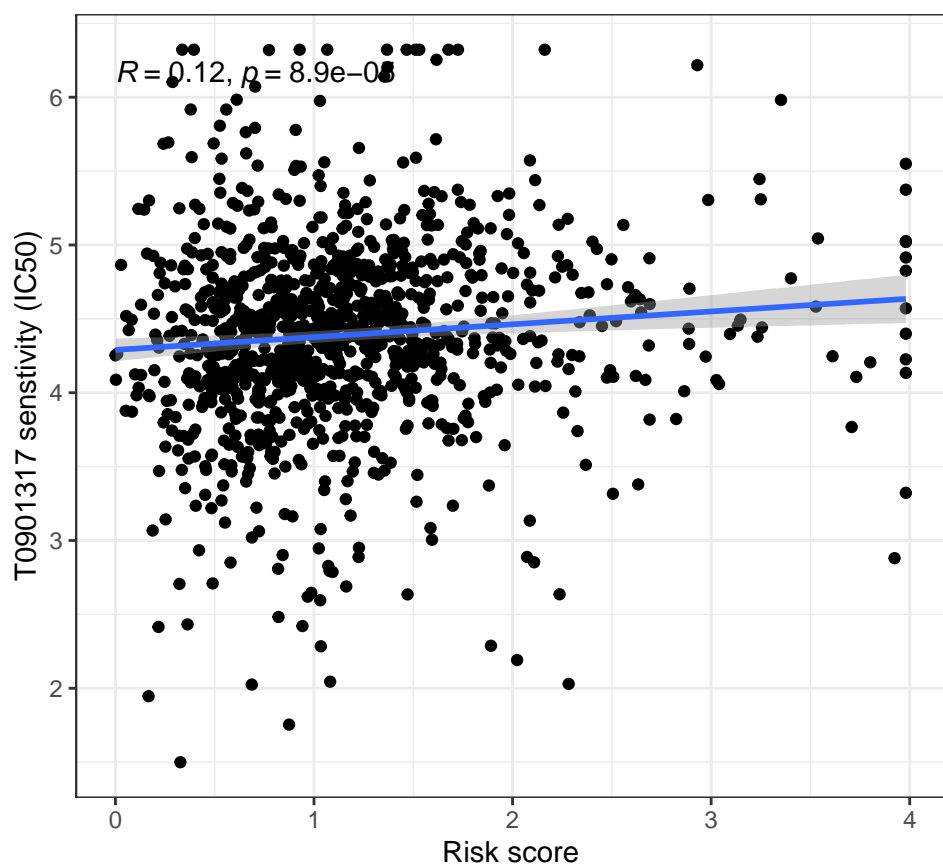

Supplement: s1 [file s1]

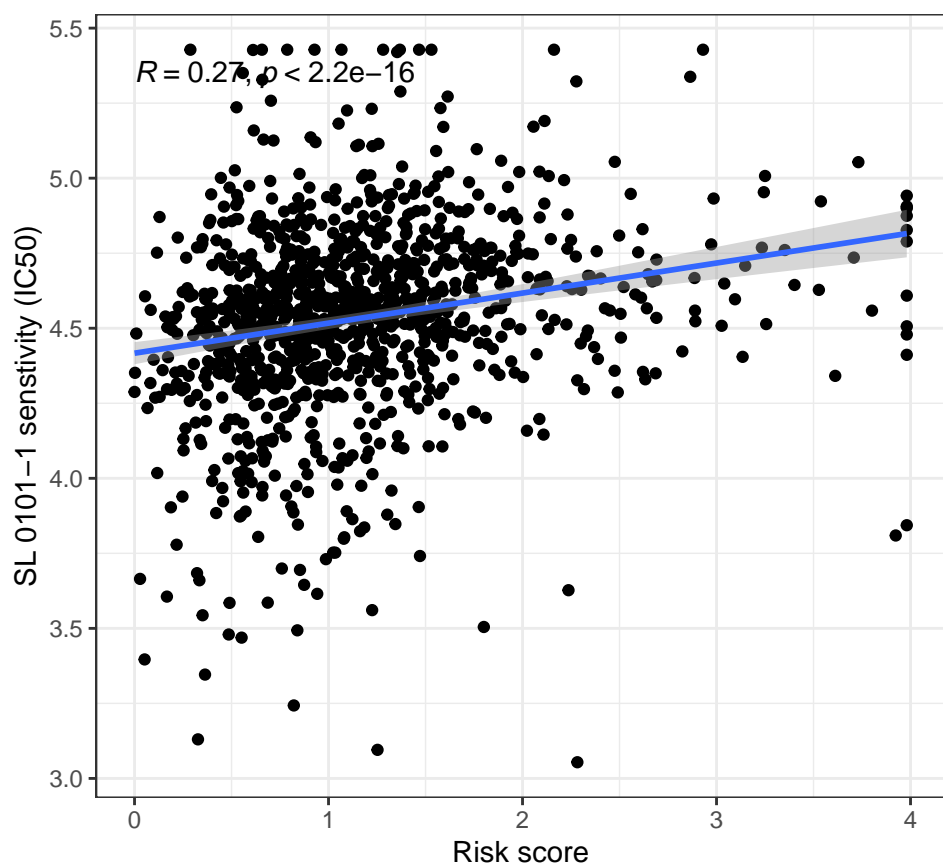

Supplement: s1 [file s1]

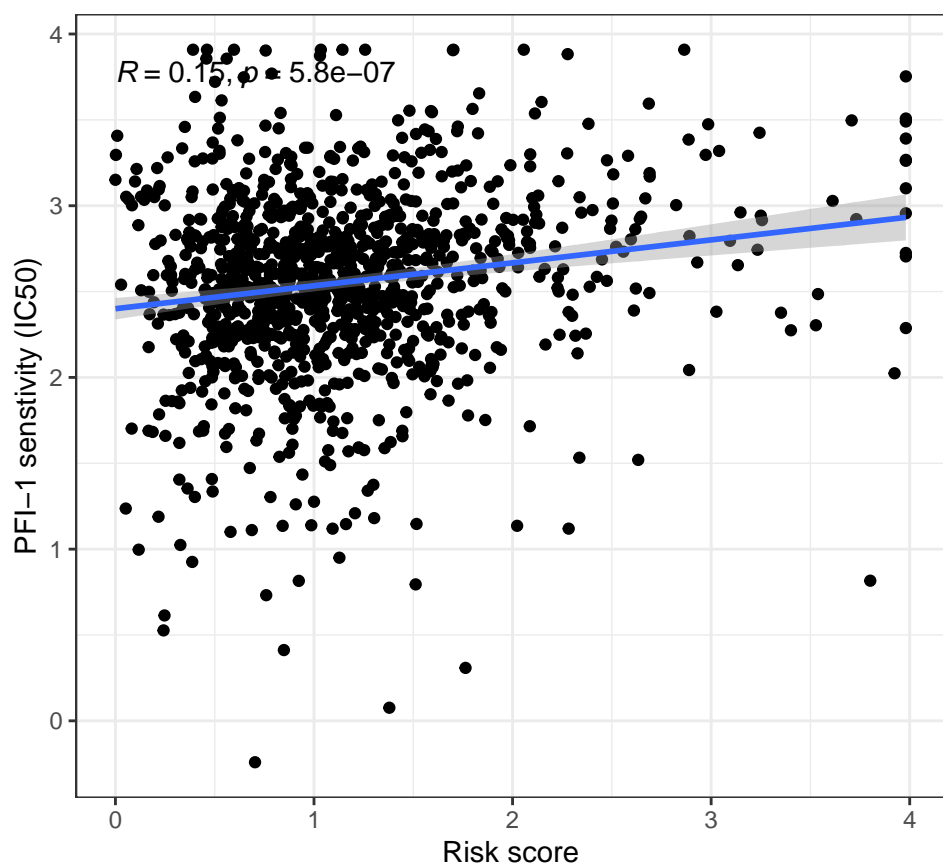

Supplement: s1 [file s1]

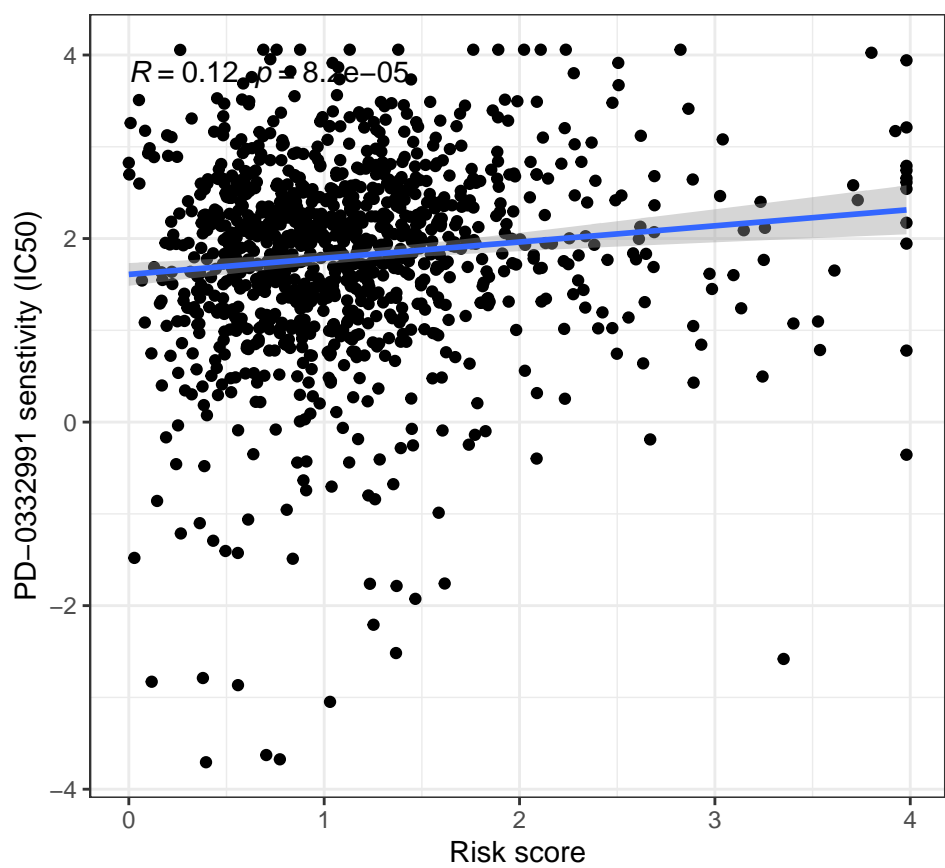

Supplement: s1 [file s1]

Risk  low  high

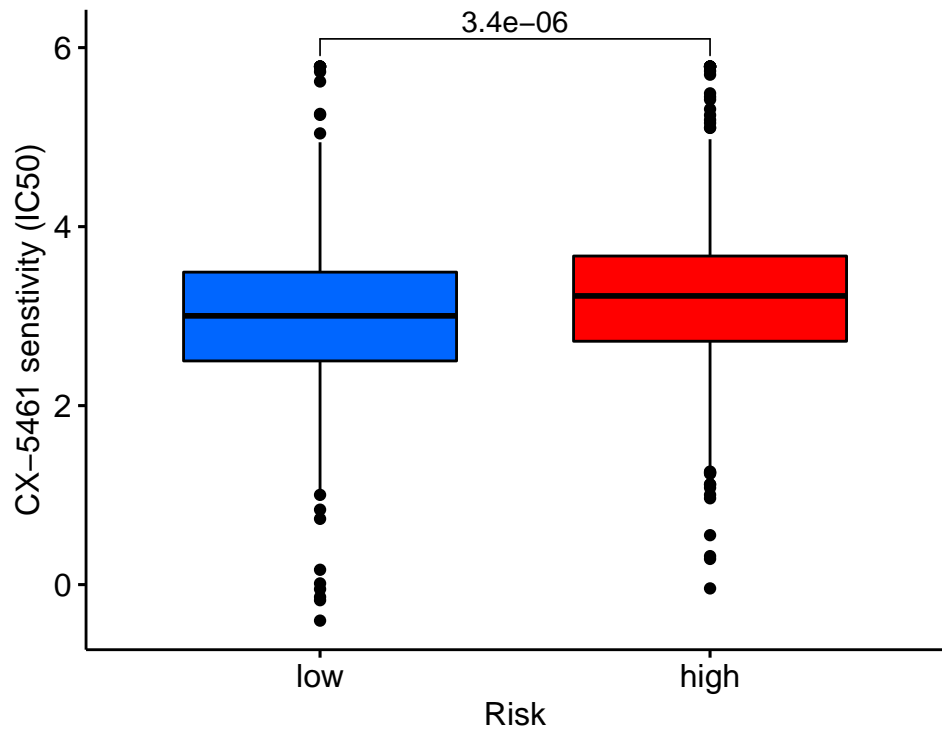

Supplement: s1 [file s1]

Risk low high

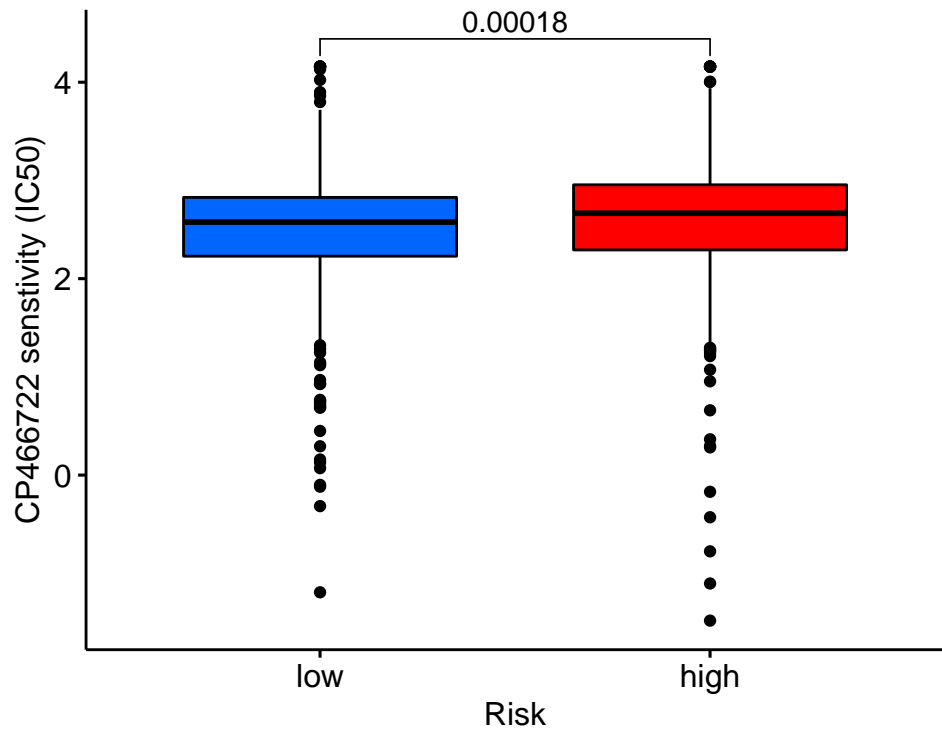

Supplement: s1 [file s1]

Risk  low  high

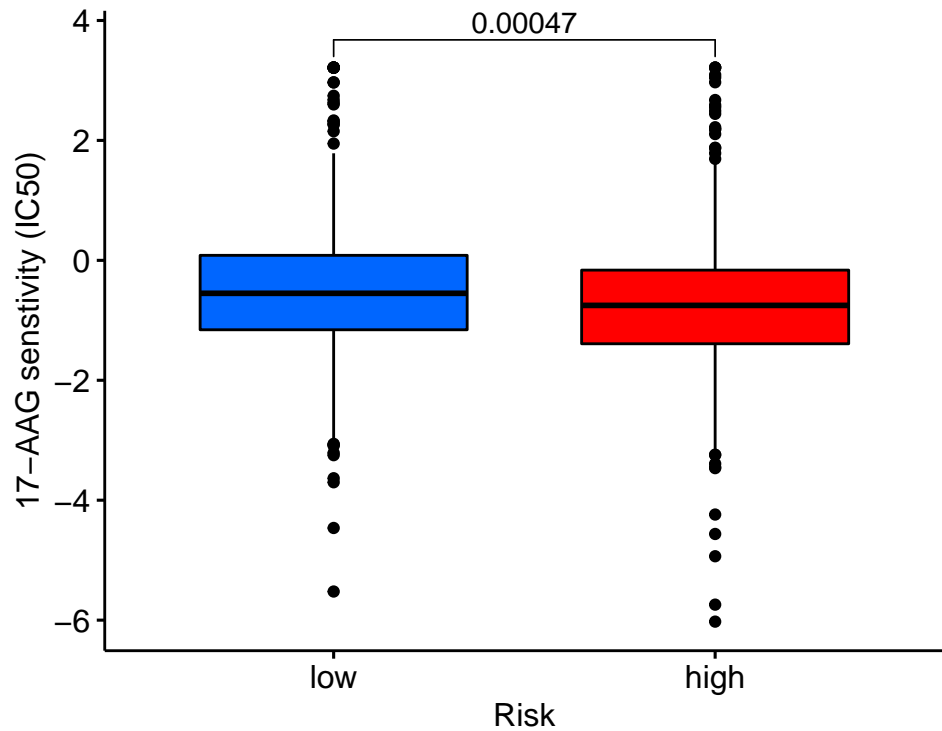

Supplement: s1 [file s1]

Bleomycin (50  $\mu$ M) sensitivity (IC50)

$R = 0.16$ ,  $p = 8.8e-08$

Risk score

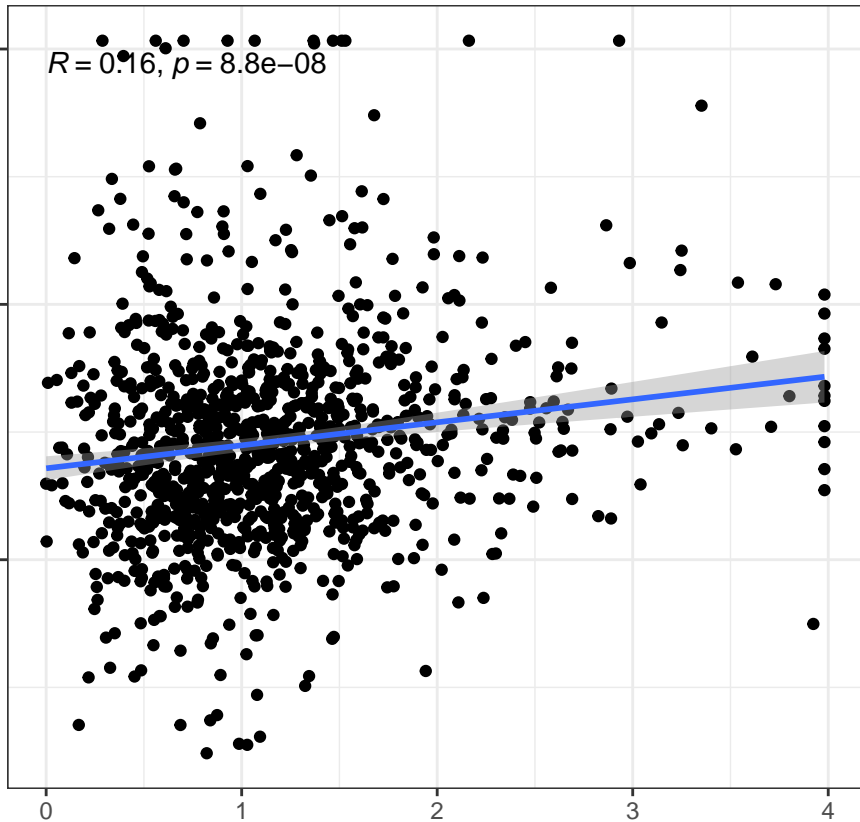

Supplement: s1 [file s1]

Risk  low  high

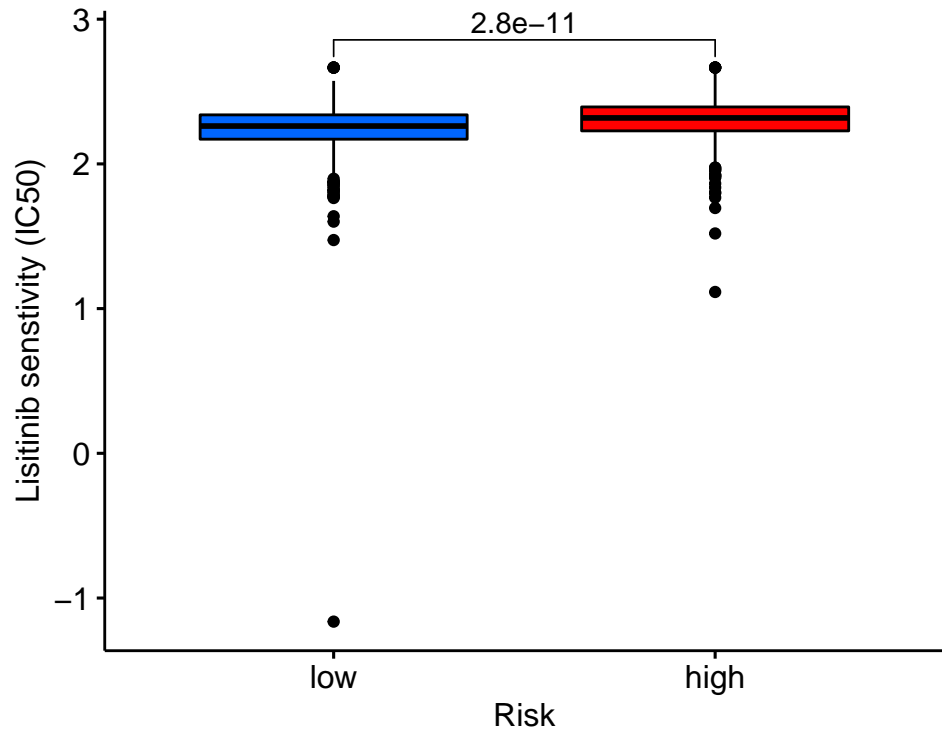

Supplement: s1 [file s1]

HG-5-113-01 sensitivity (IC50)

Risk  low  high

$3.1\text{e-}05$

low

high

Risk

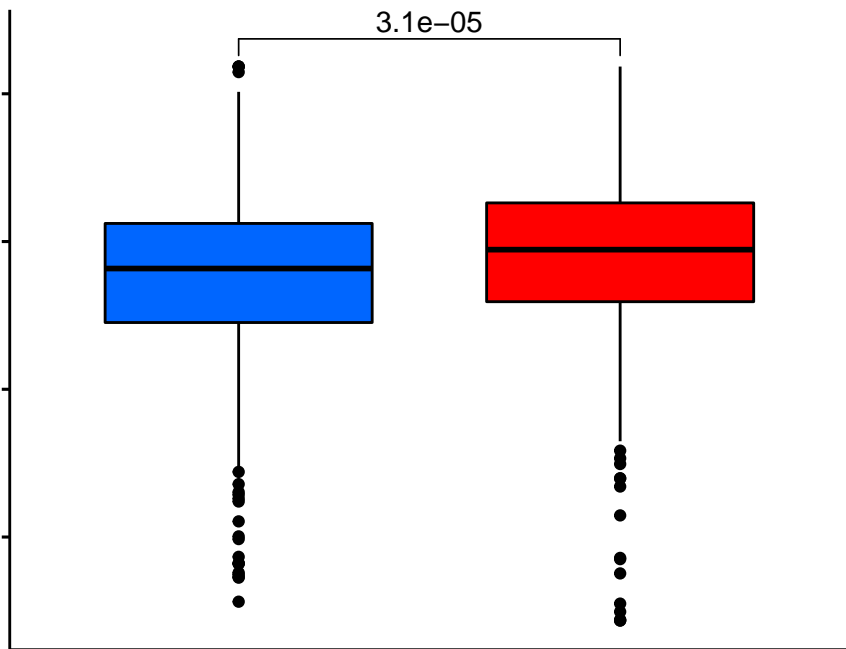

Supplement: s1 [file s1]

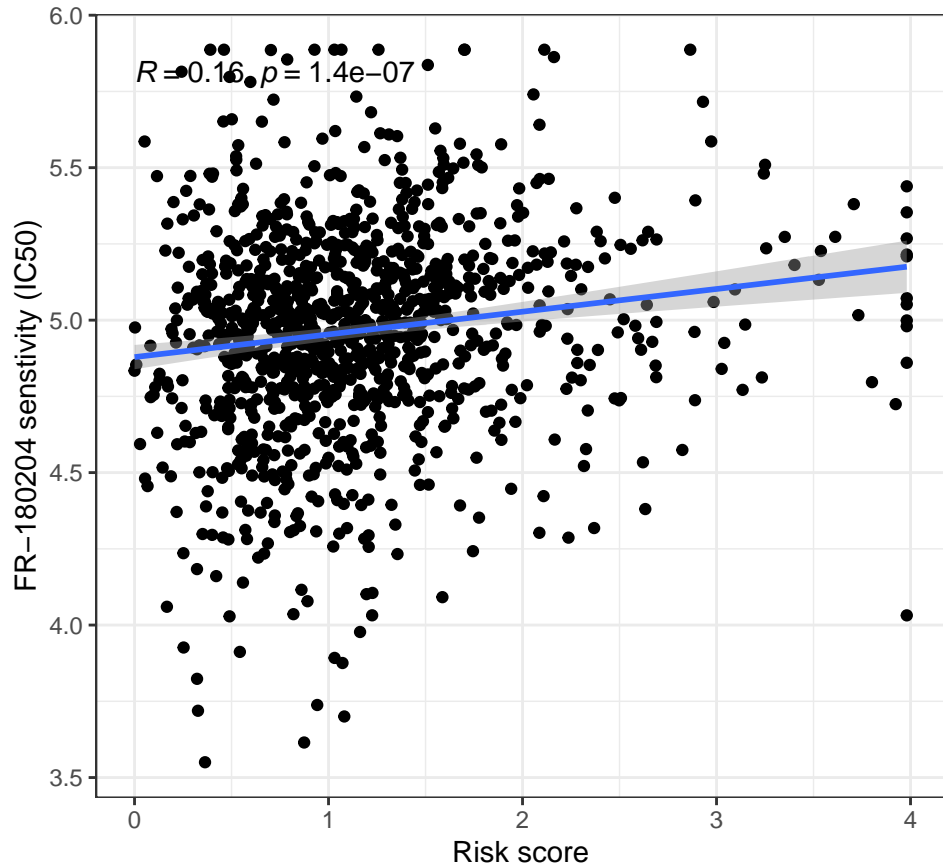

Supplement: s1 [file s1]

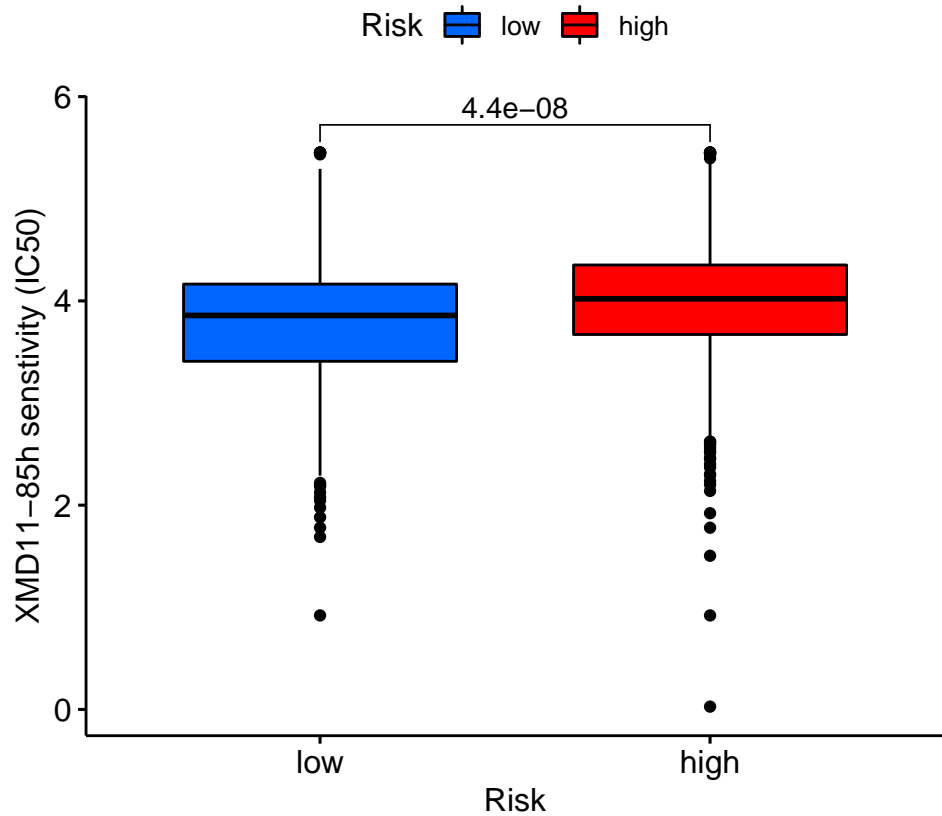

Supplement: s1 [file s1]

Risk  low  high

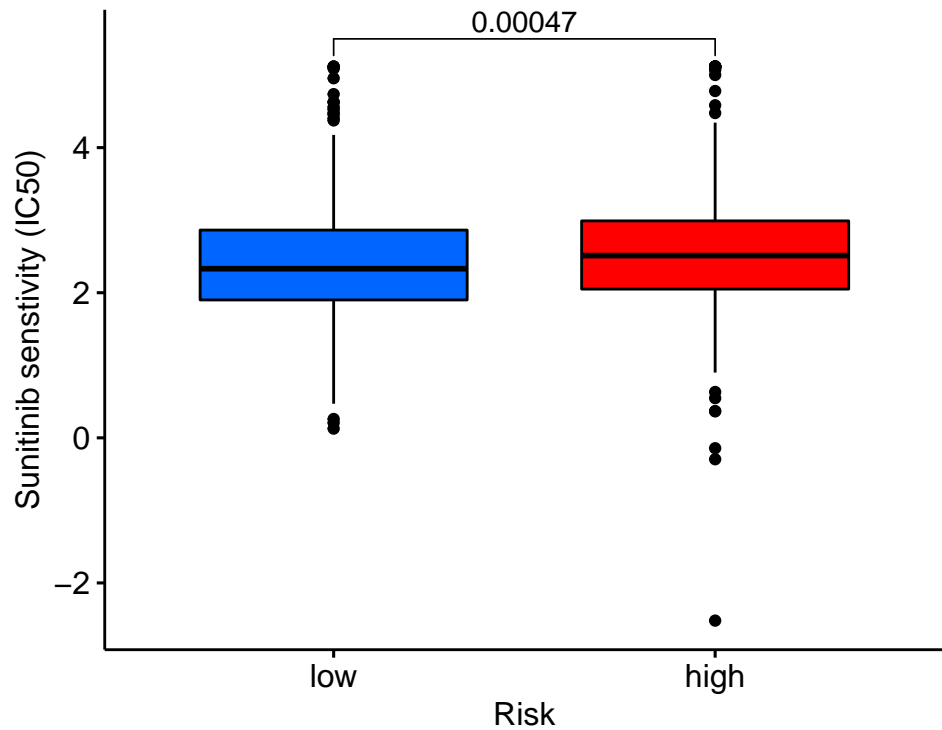

Supplement: s1 [file s1]

PD-0332991 sensitivity (IC50)

Risk  low  high

0.00012

low

high

Risk

2.5

0.0

-2.5

Supplement: s1 [file s1]

GSK1070916 sensitivity (IC50)

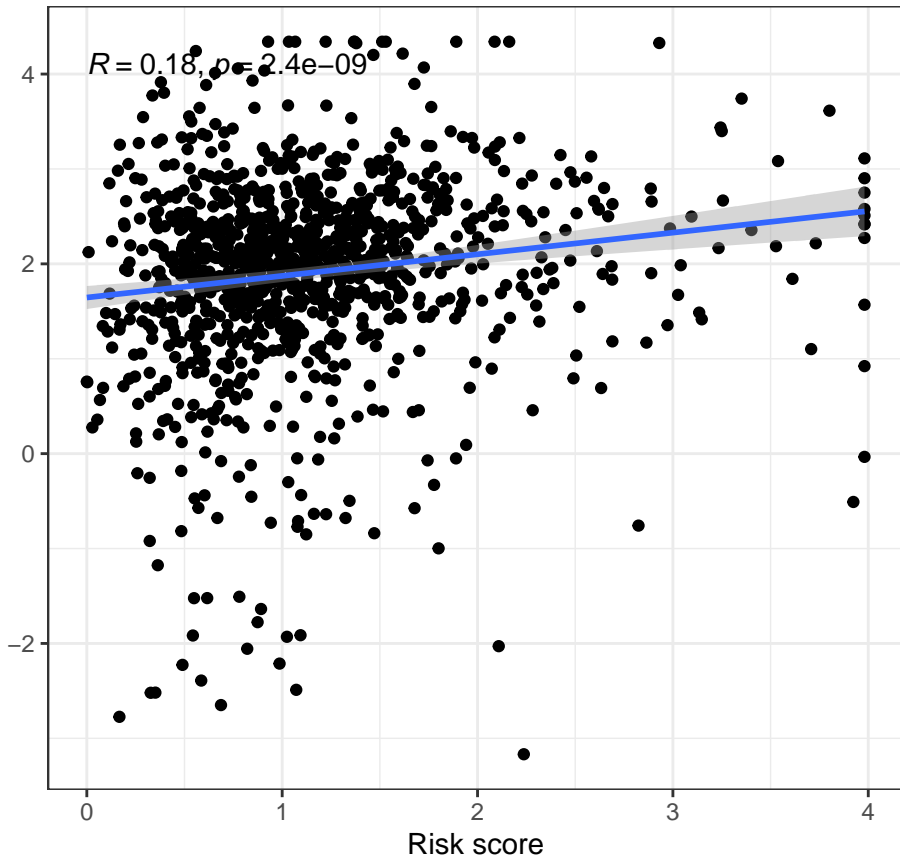

Supplement: s1 [file s1]

Risk  low  high

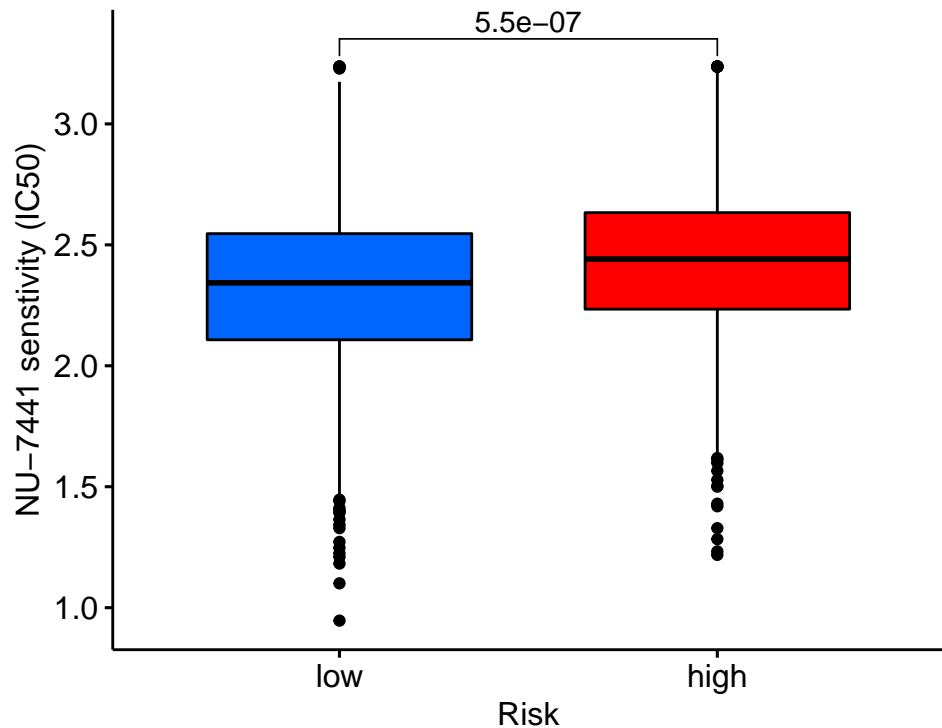

Supplement: s1 [file s1]

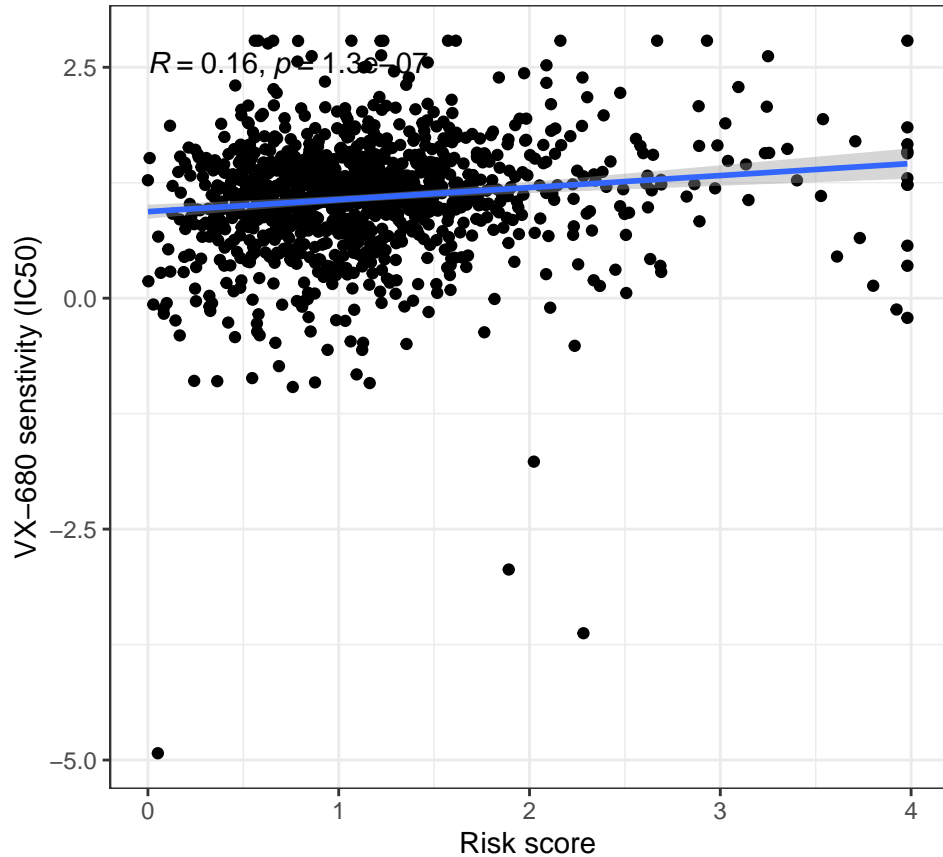

Supplement: s1 [file s1]

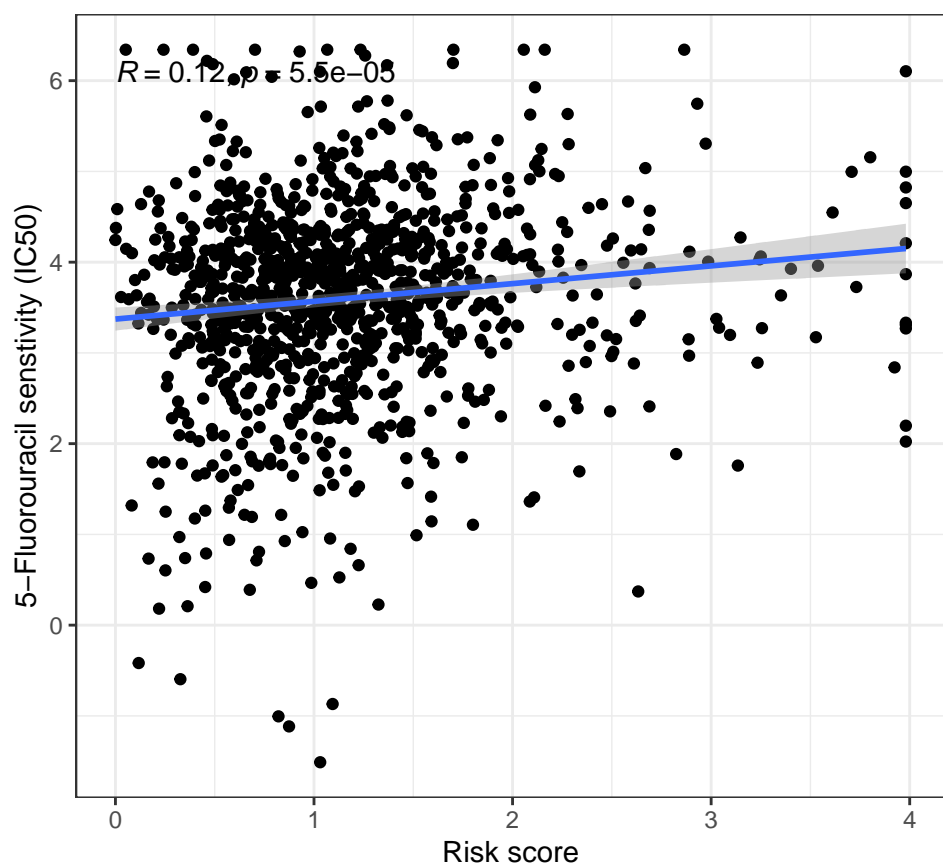

Supplement: s1 [file s1]

Risk  low  high

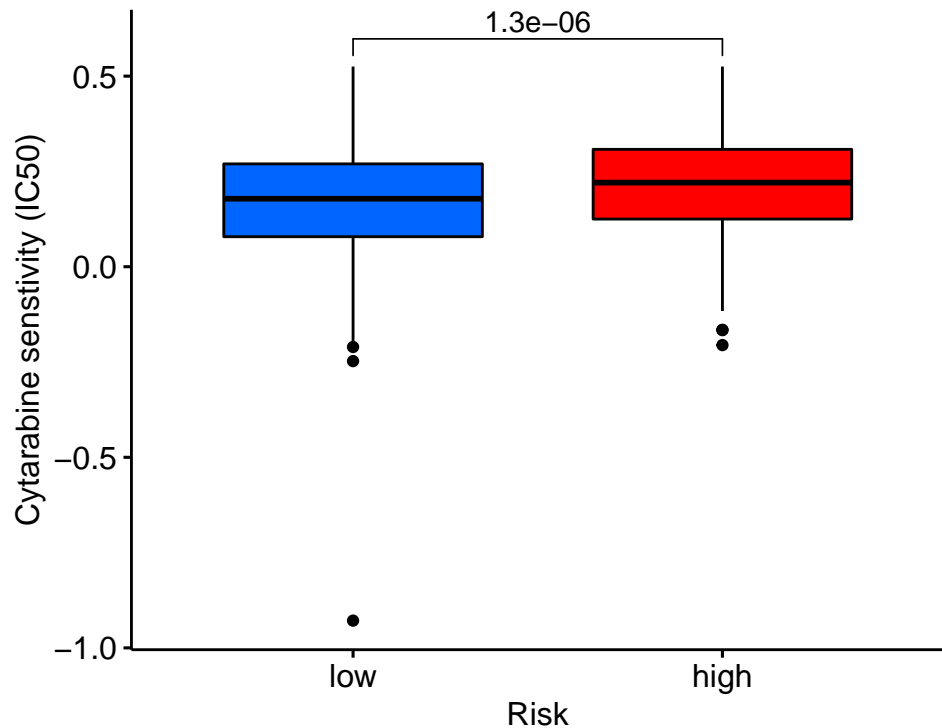

Supplement: s1 [file s1]

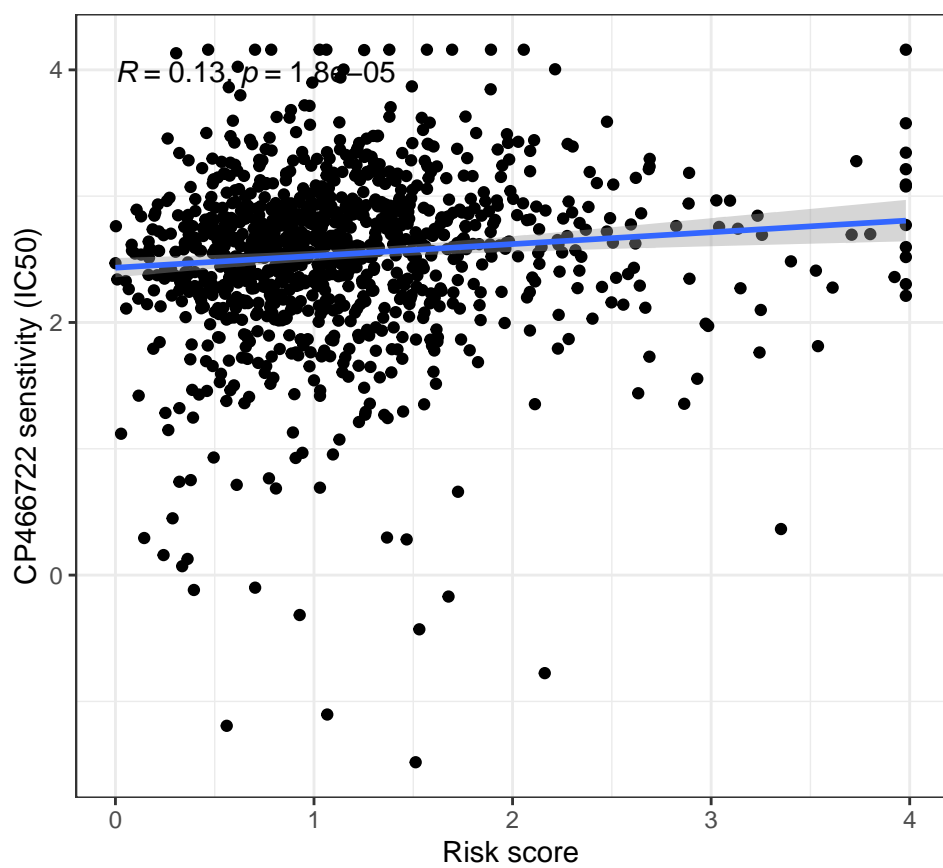

Supplement: s1 [file s1]

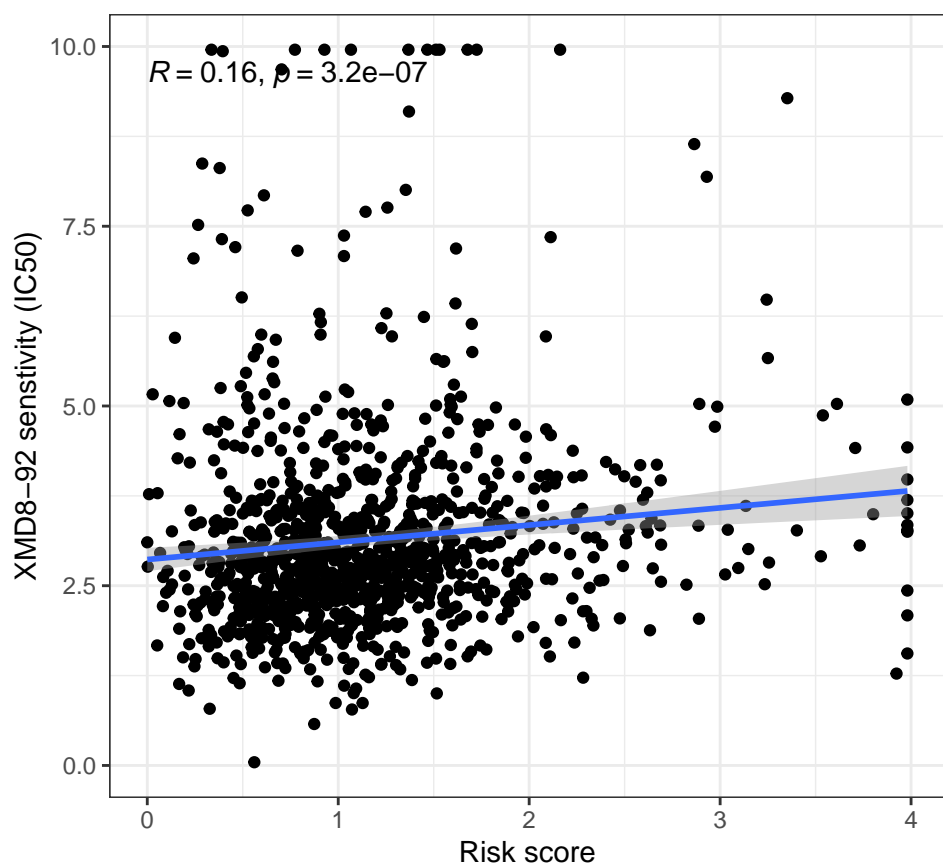

Supplement: s1 [file s1]

Risk  low  high

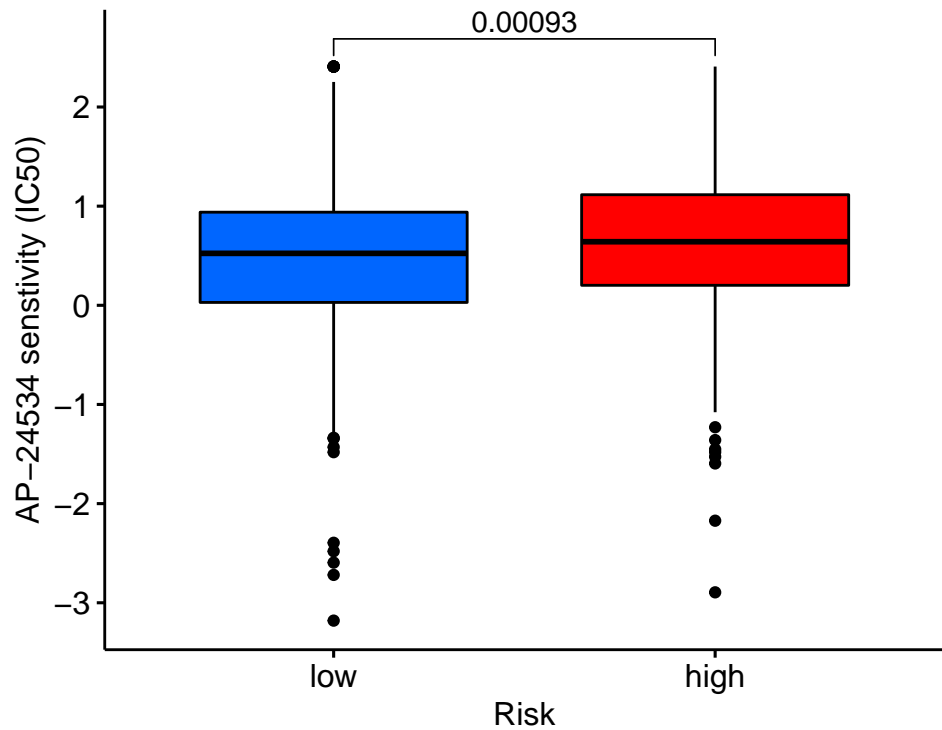

Supplement: s1 [file s1]

Sunitinib sensitivity (IC50)

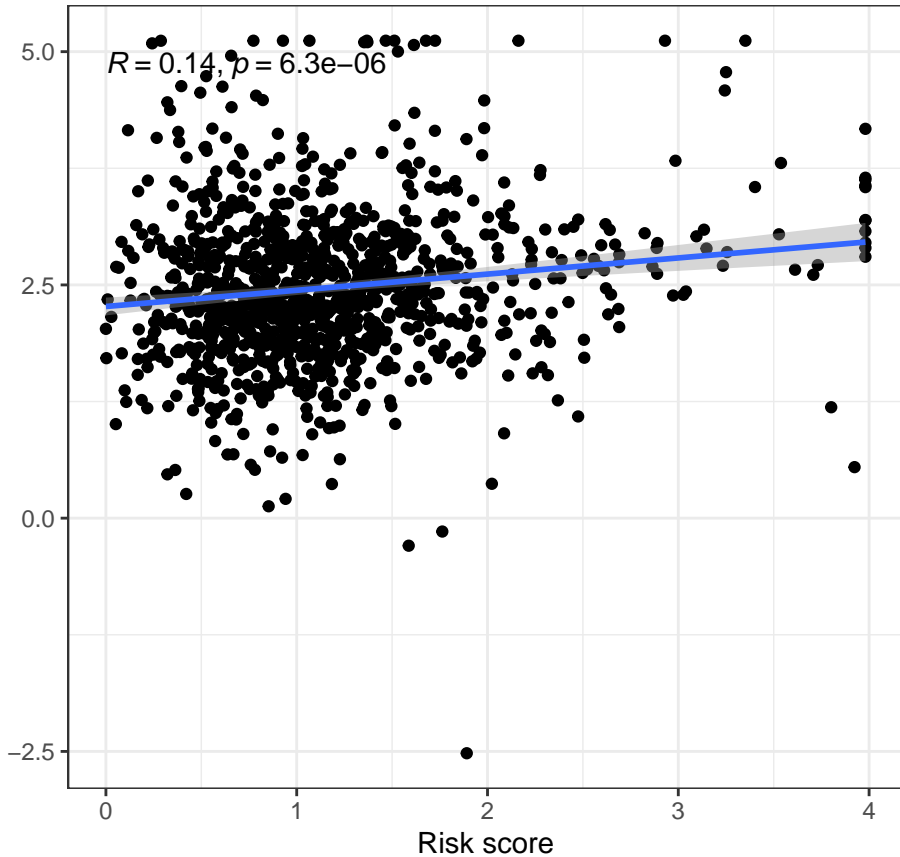

Supplement: s1 [file s1]

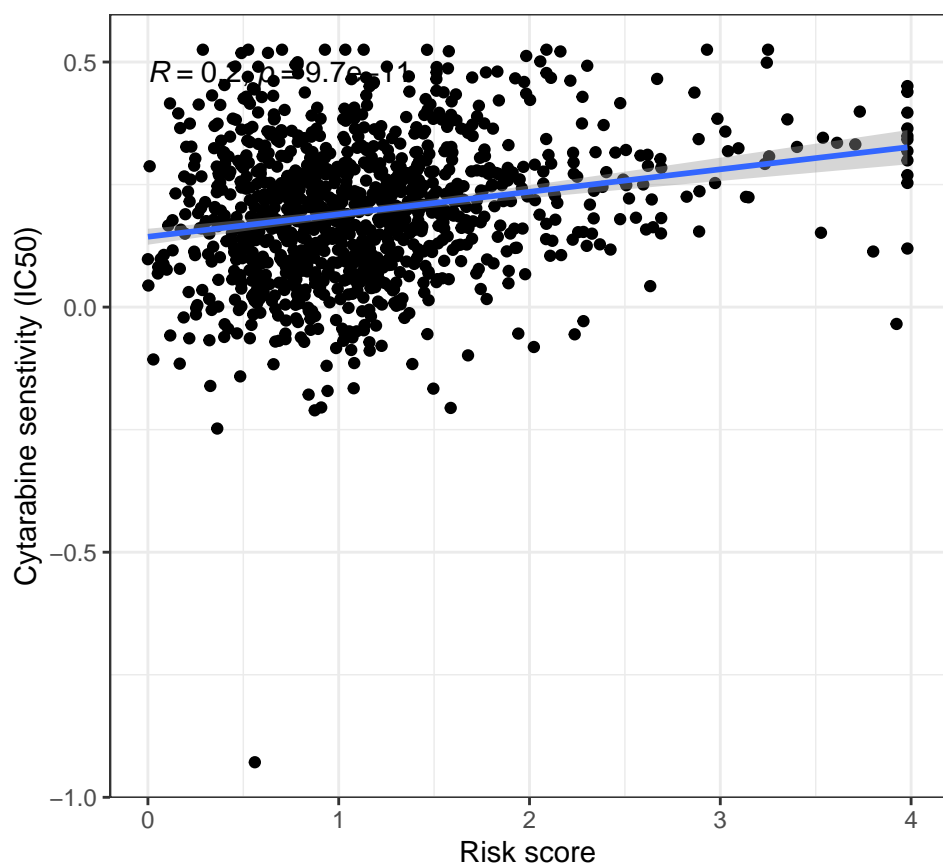

Supplement: s1 [file s1]

Risk  low  high

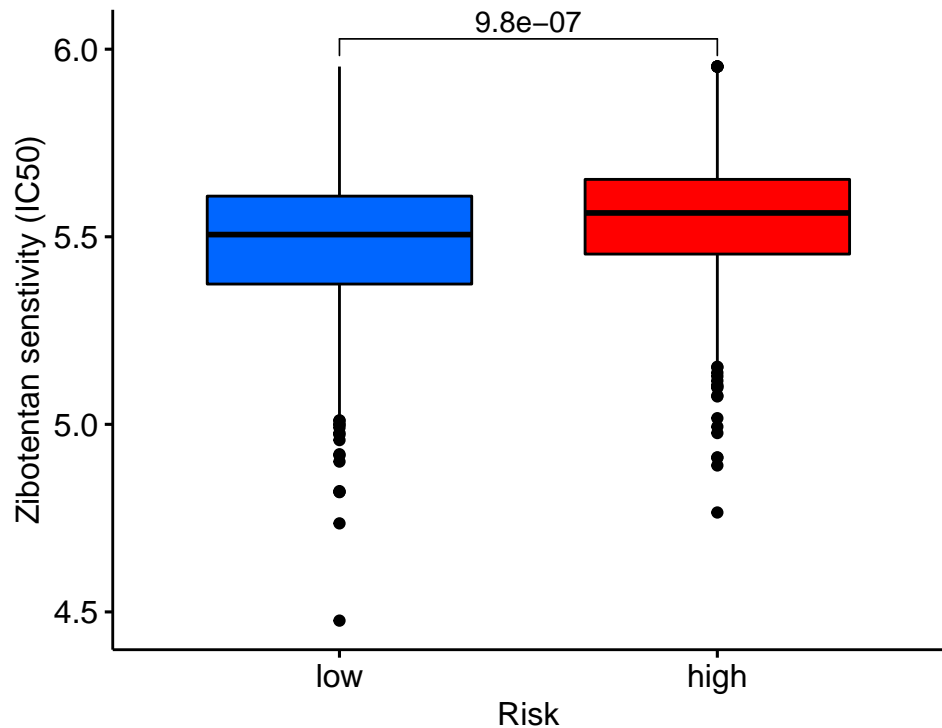

Supplement: s1 [file s1]

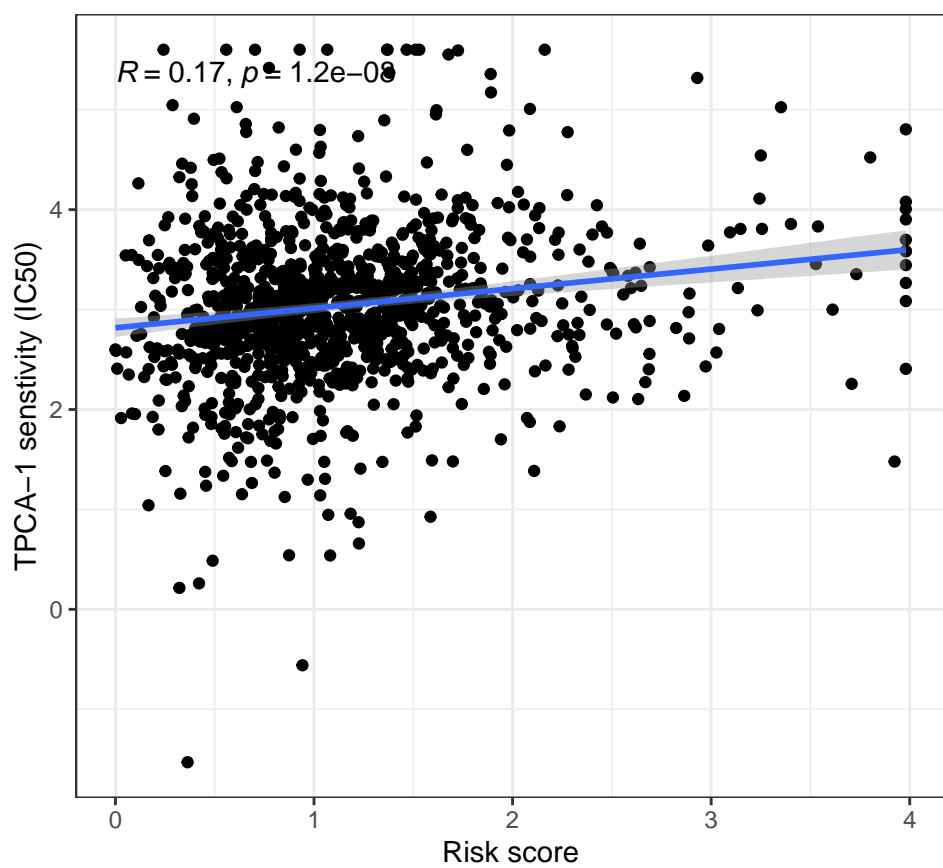

Supplement: s1 [file s1]

Risk  low  high

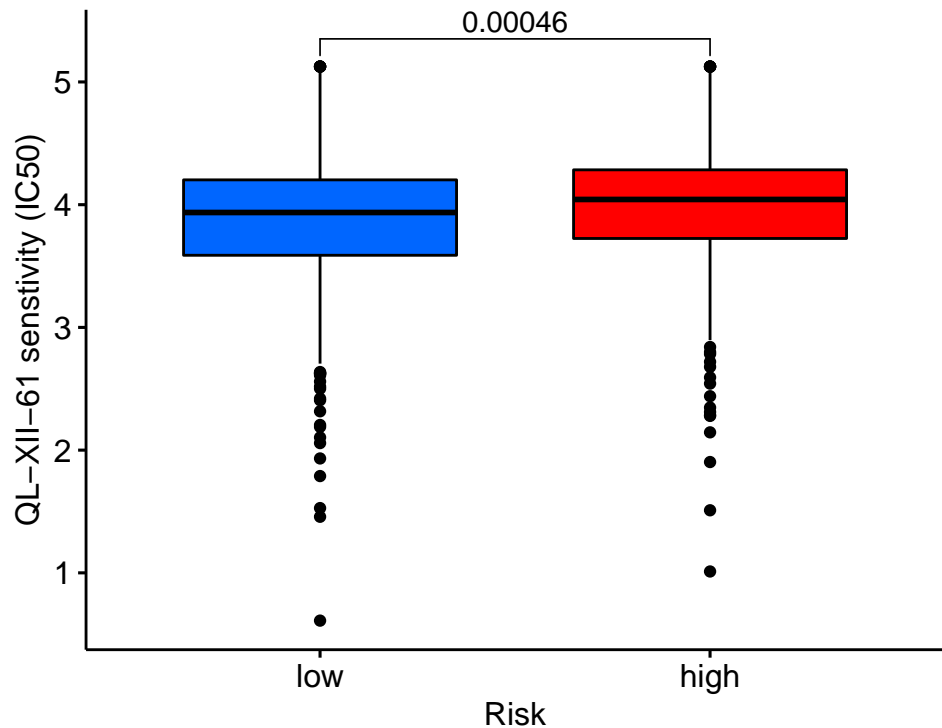

Supplement: s1 [file s1]

BMS-754807 sensitivity (IC50)

Risk low high

0.00032

low

high

Risk

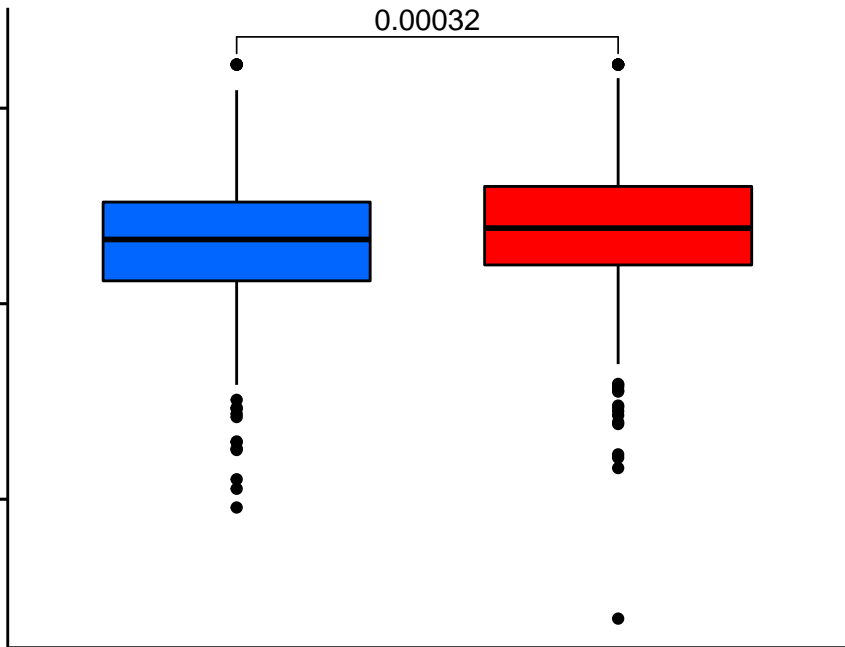

Supplement: s1 [file s1]

Risk  low  high

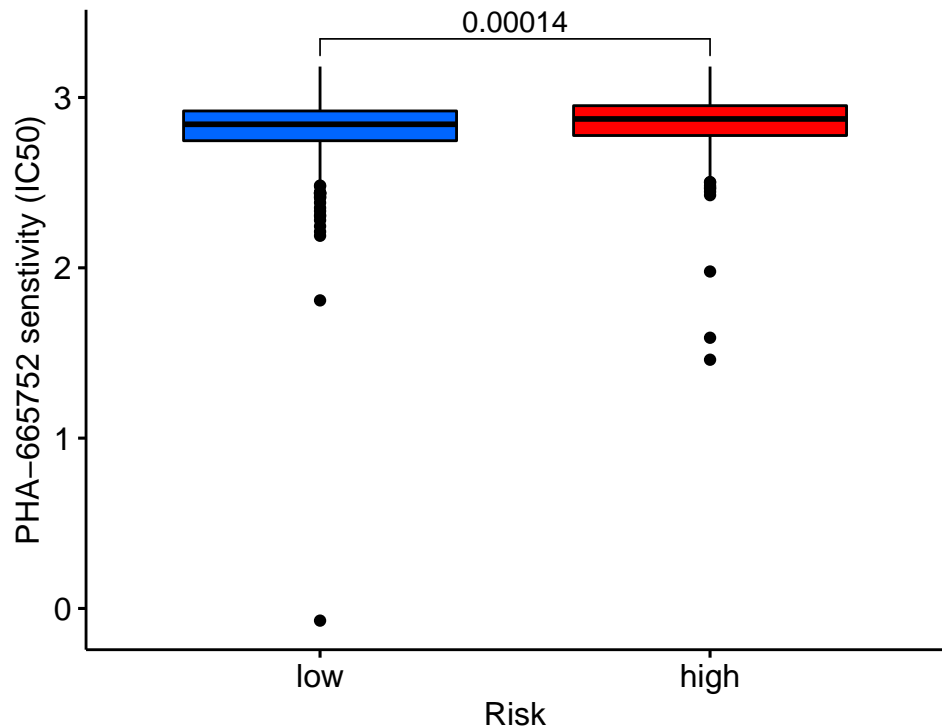

Supplement: s1 [file s1]

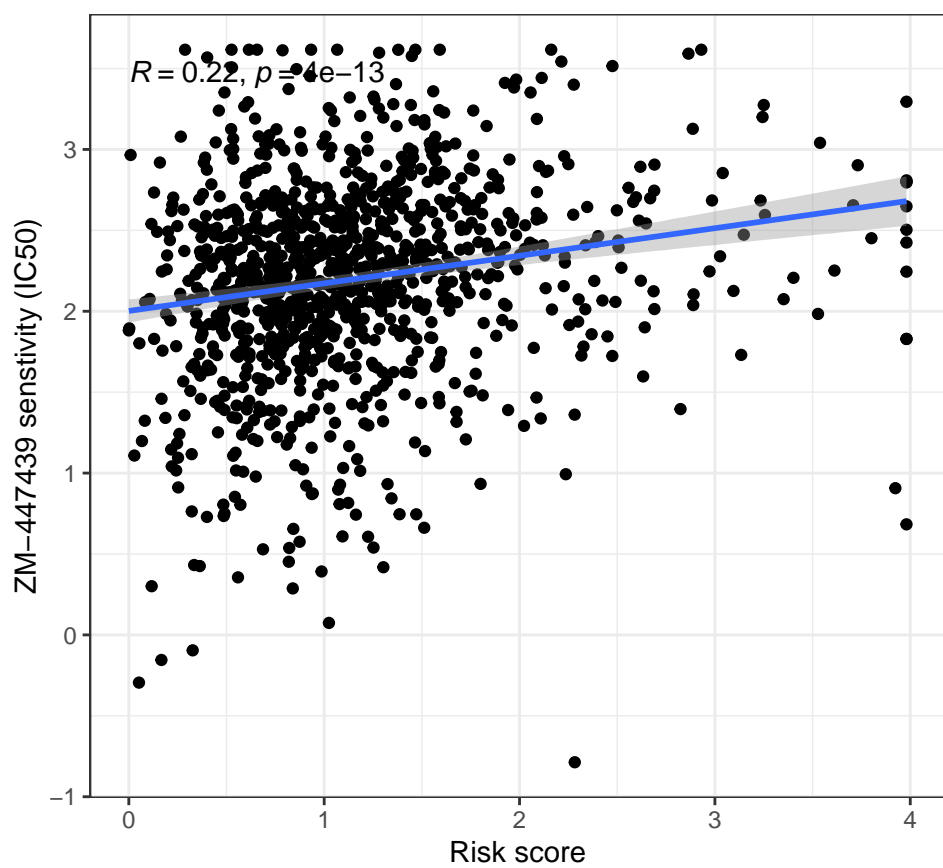

Supplement: s1 [file s1]

Risk  low  high

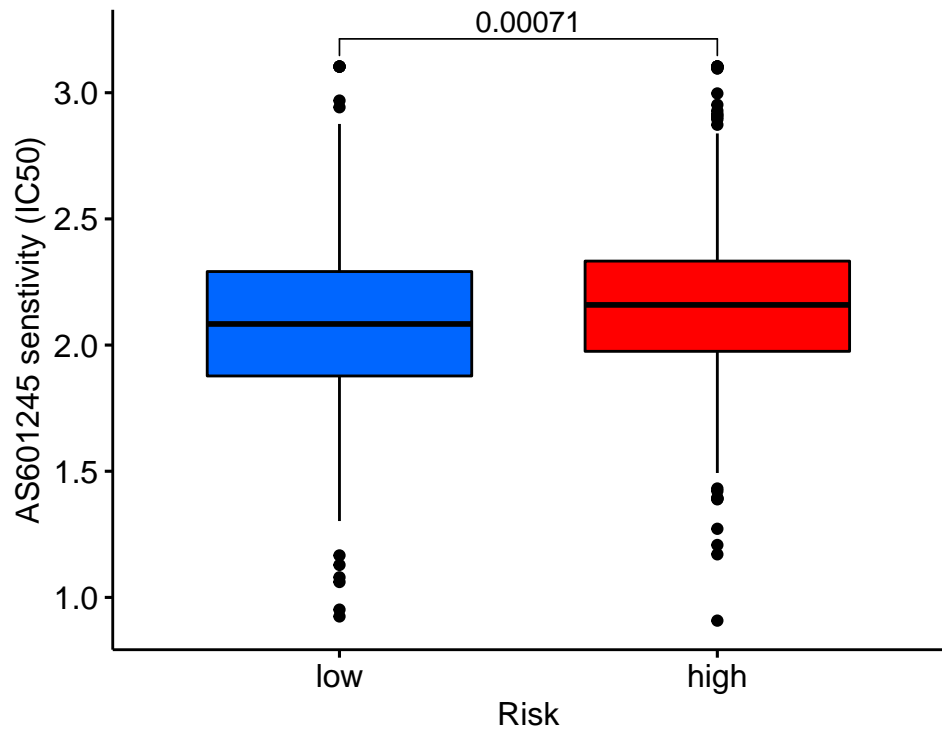

Supplement: s1 [file s1]

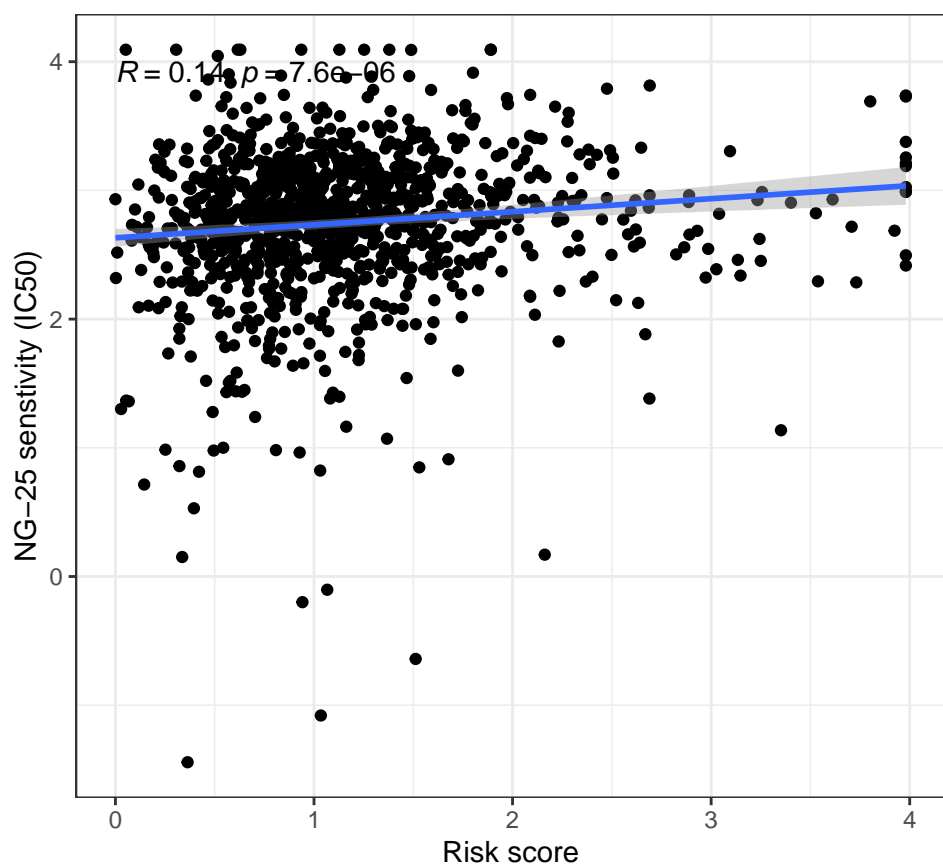

Supplement: s1 [file s1]

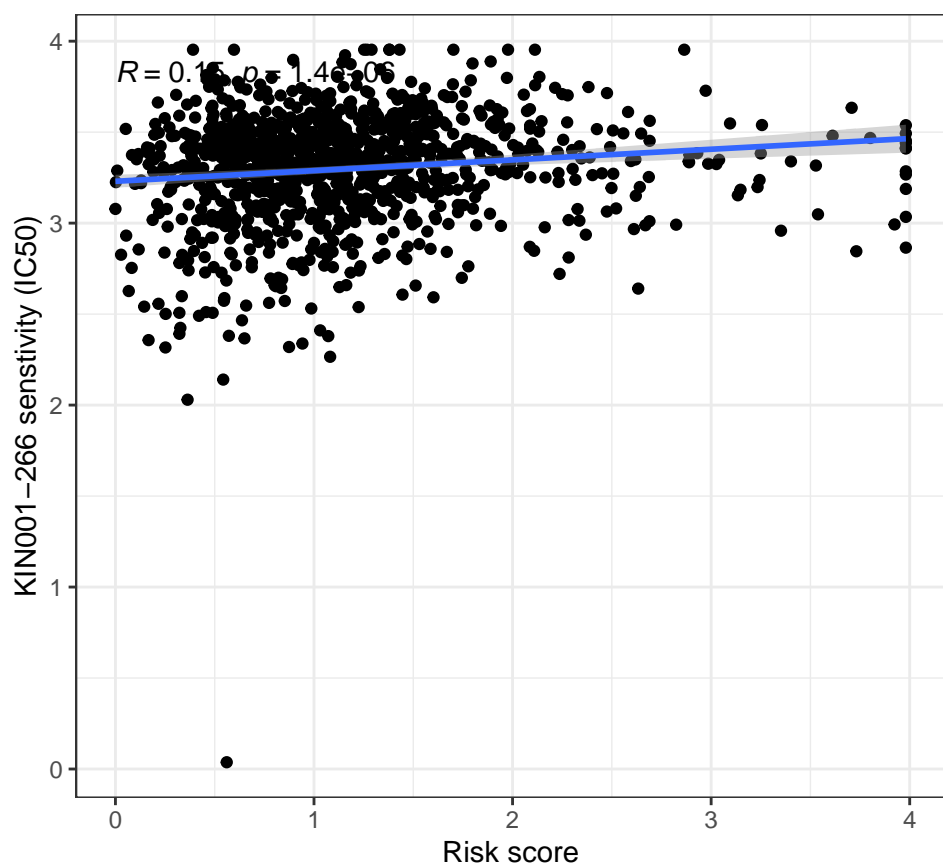

Supplement: s1 [file s1]

Risk  low  high

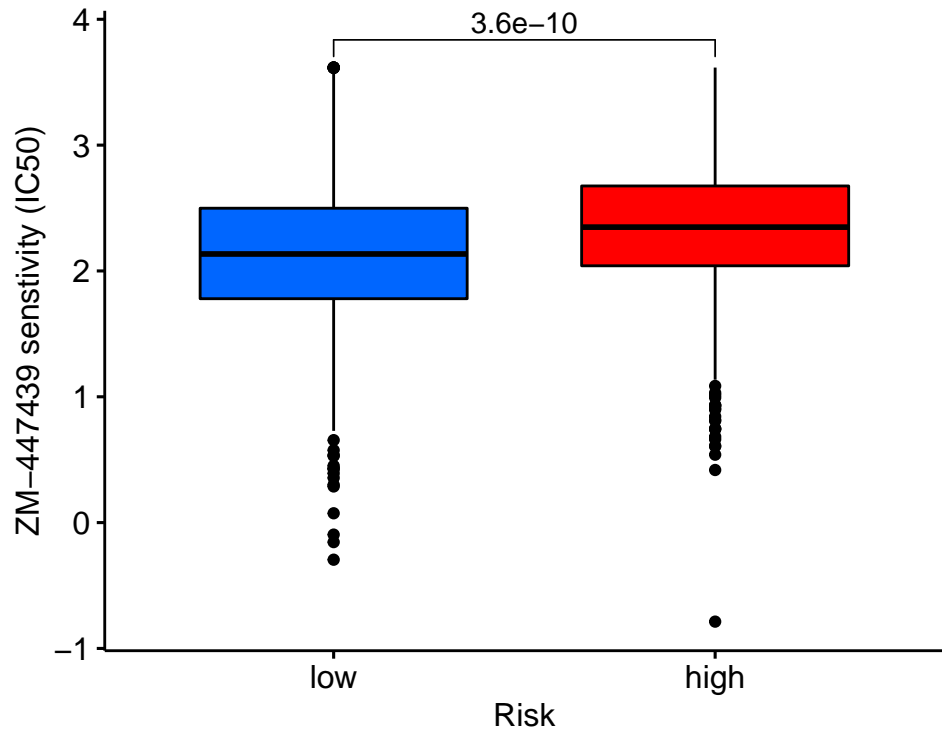

Supplement: s1 [file s1]

Risk  low  high

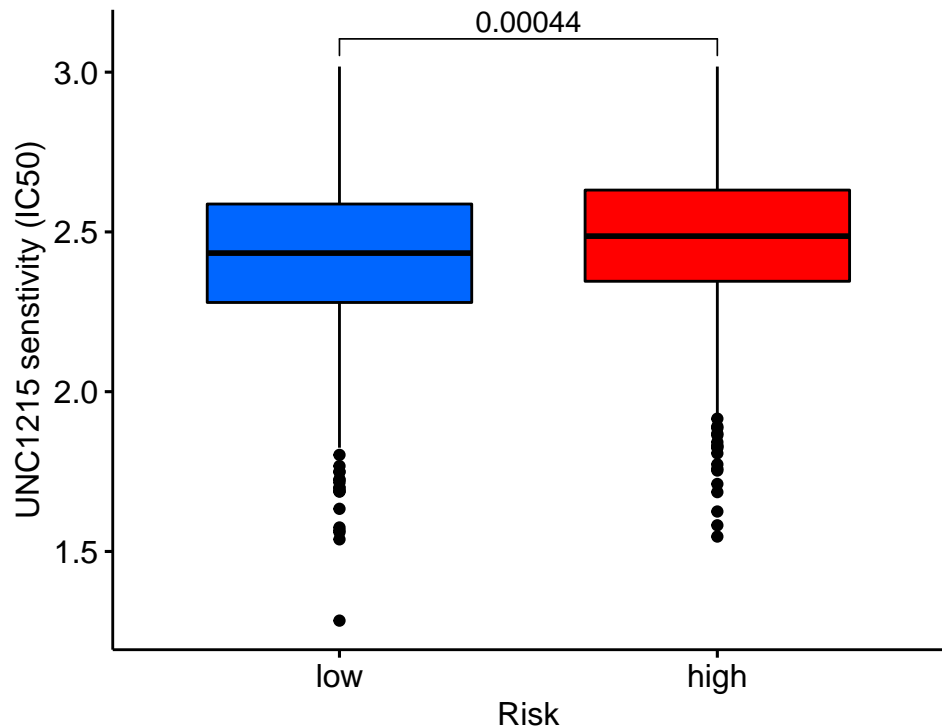

Supplement: s1 [file s1]

Risk  low  high

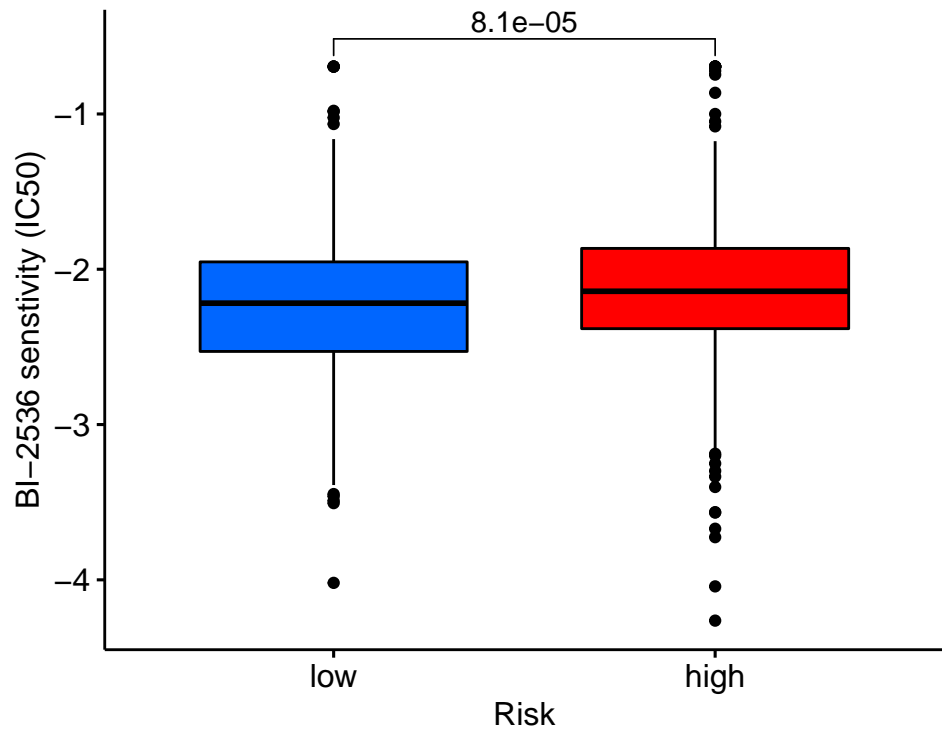

Supplement: s1 [file s1]

Risk  low  high

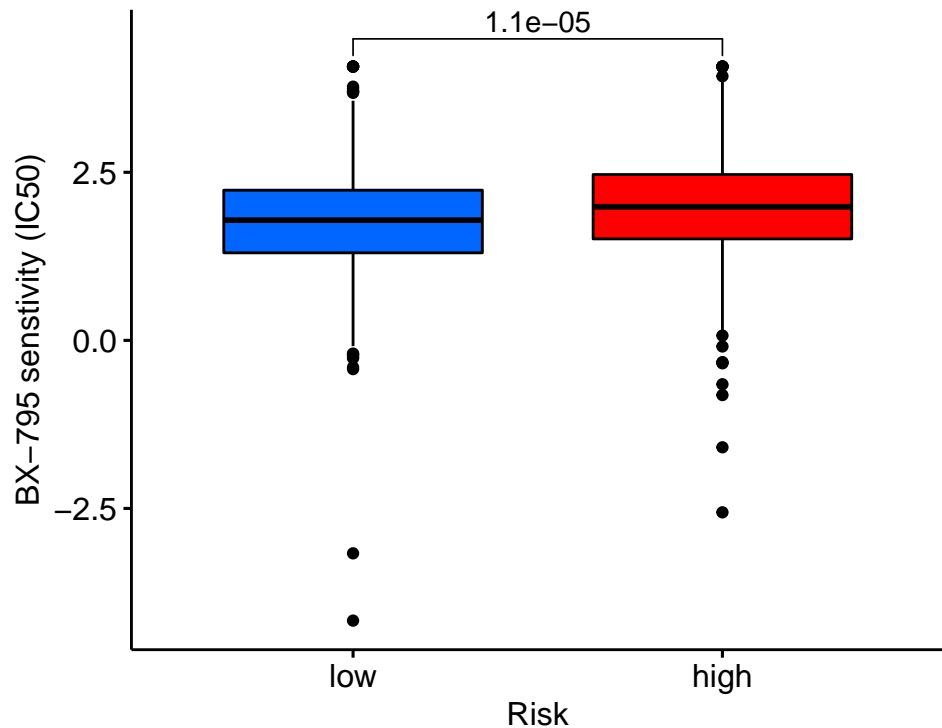

Supplement: s1 [file s1]

Risk  low  high

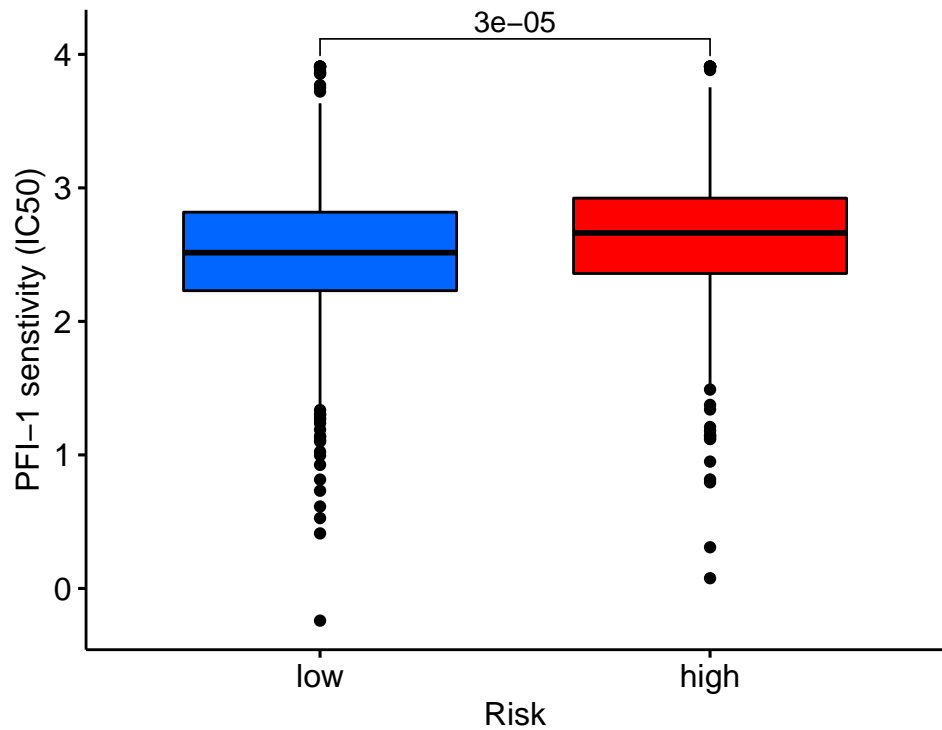

Supplement: s1 [file s1]

Risk  low  high

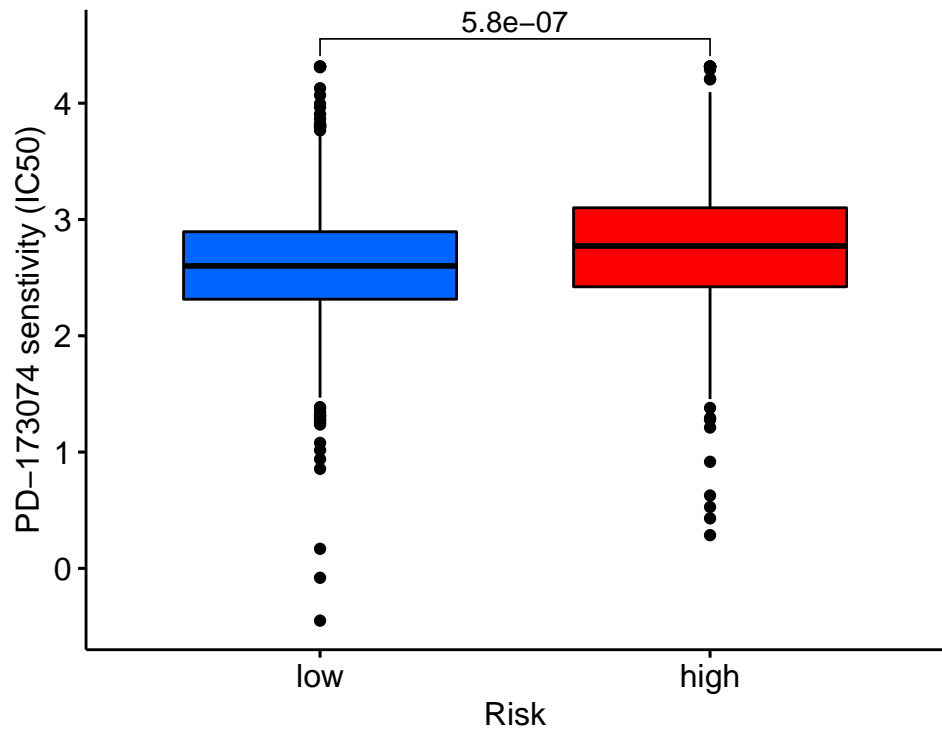

Supplement: s1 [file s1]

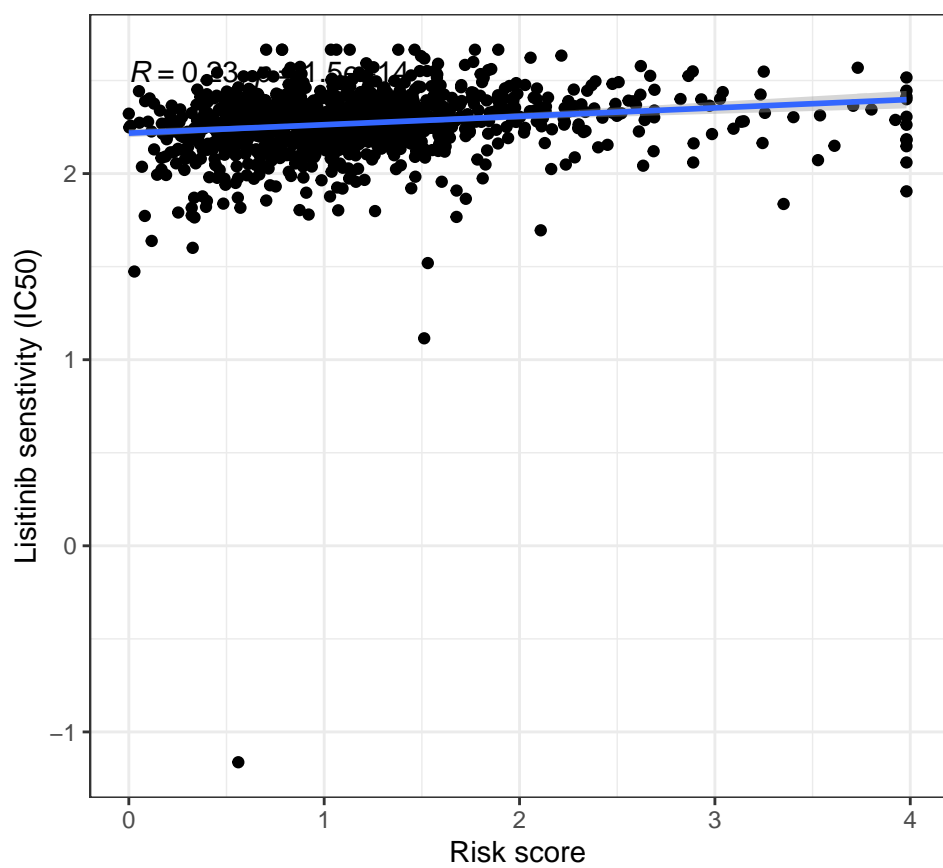

Supplement: s1 [file s1]

Risk  low  high

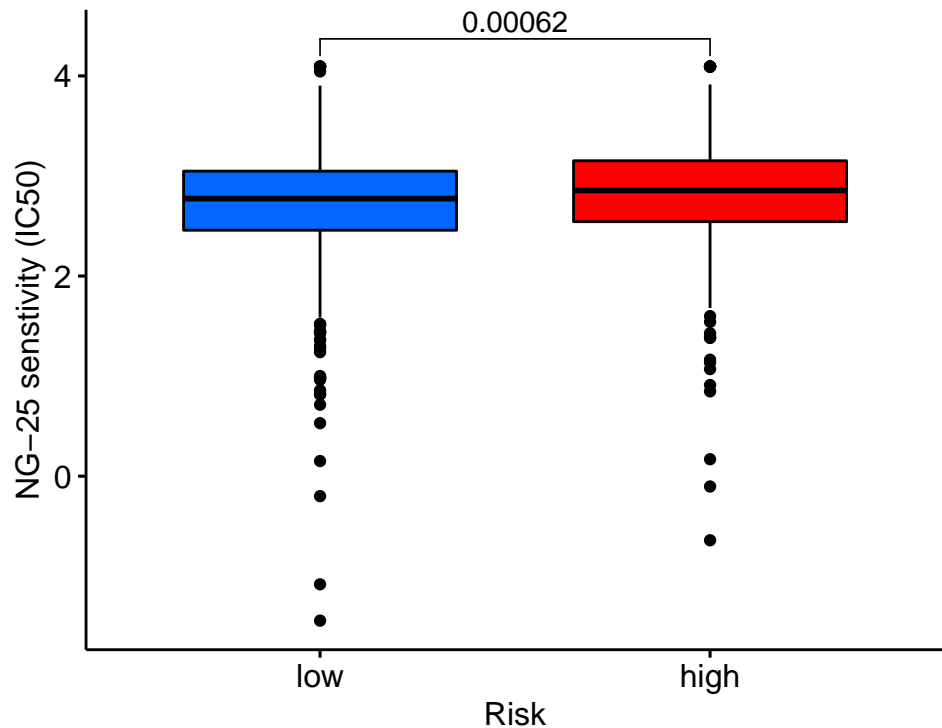

Supplement: s1 [file s1]

Risk  low  high

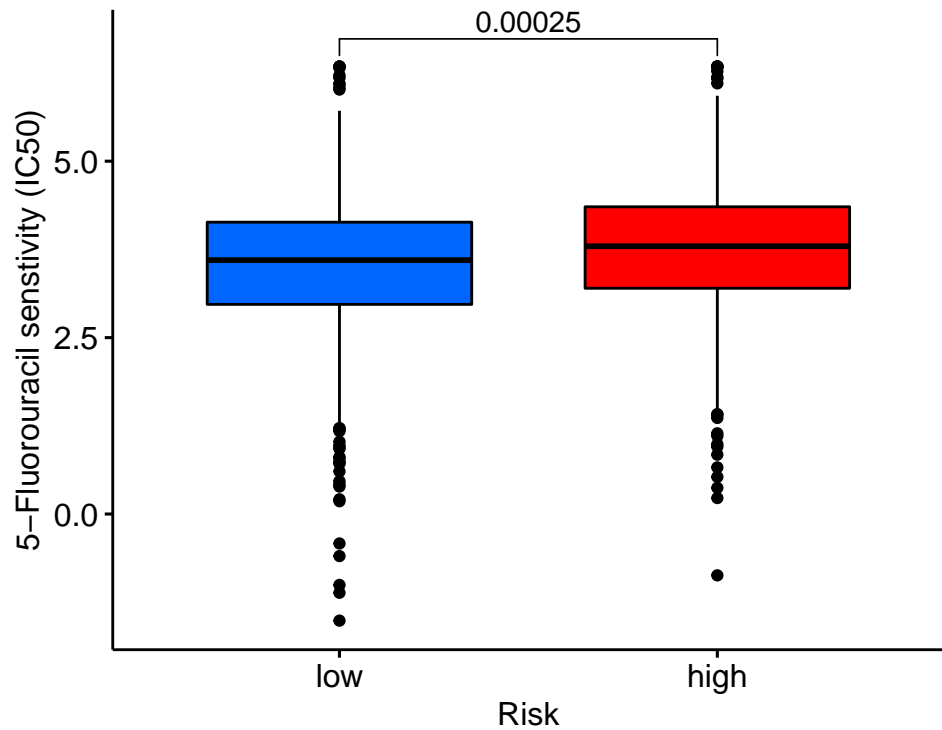

Supplement: s1 [file s1]

Risk  low  high

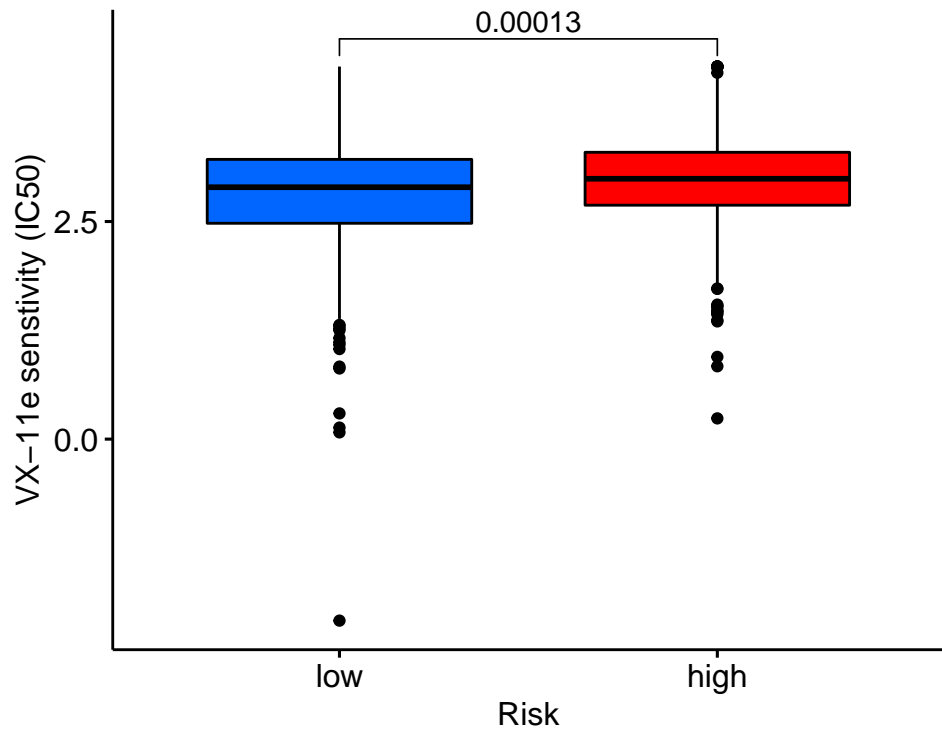

Supplement: s1 [file s1]

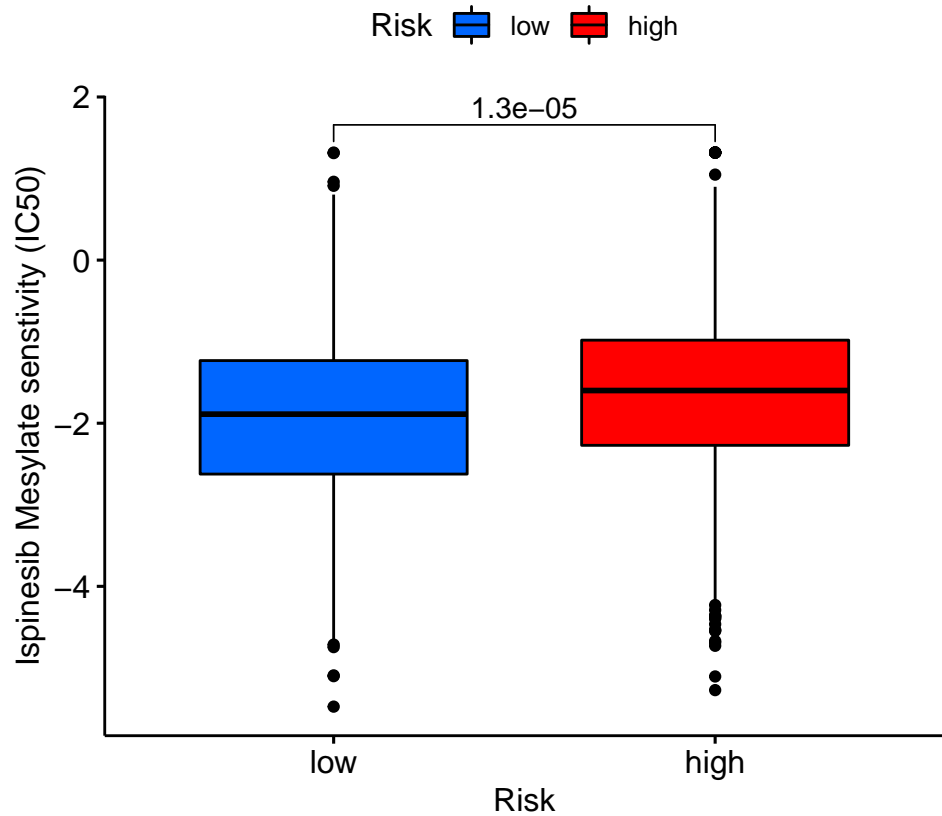

Supplement: s1 [file s1]

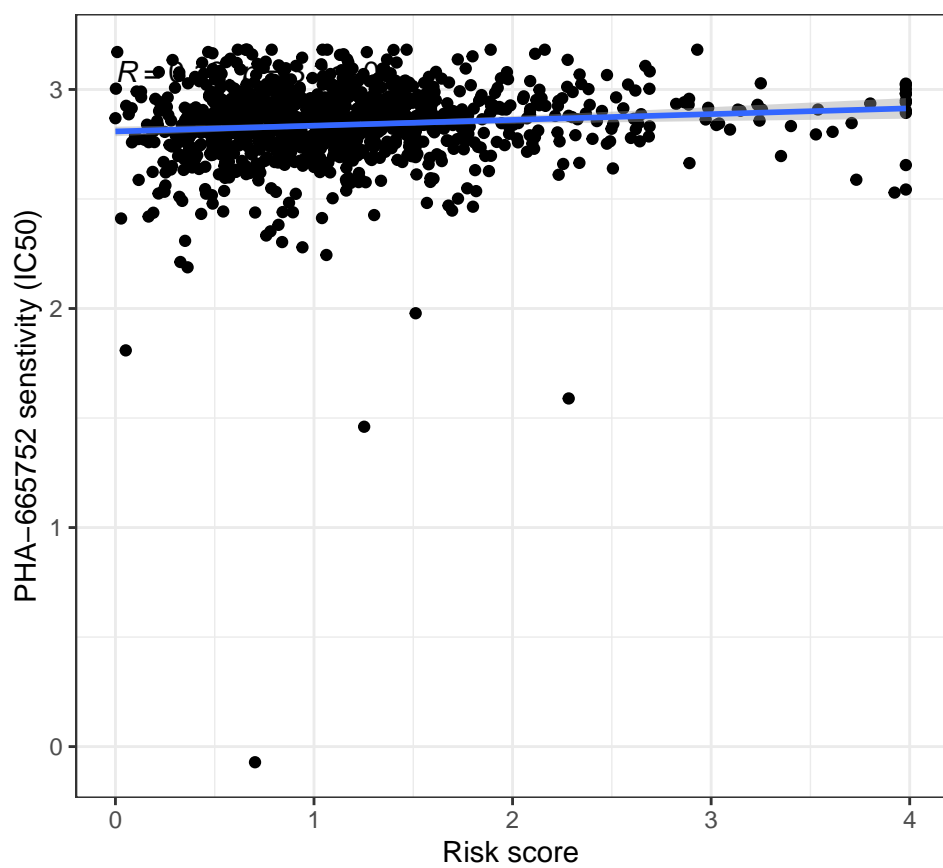

Supplement: s1 [file s1]

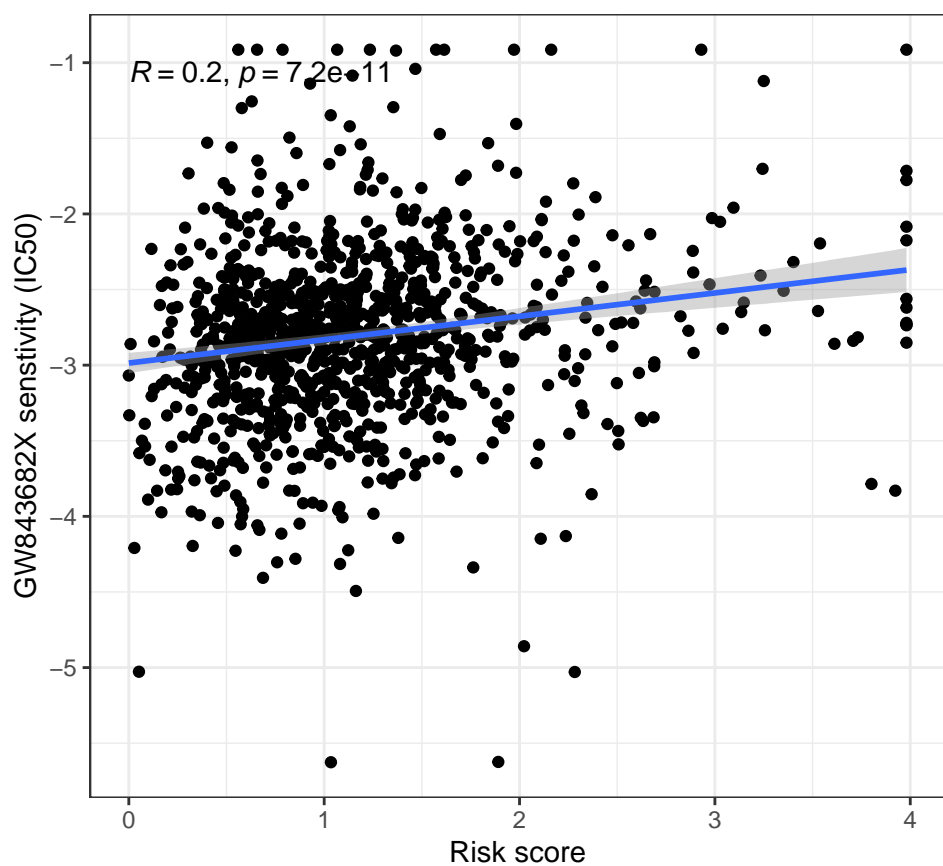

Supplement: s1 [file s1]

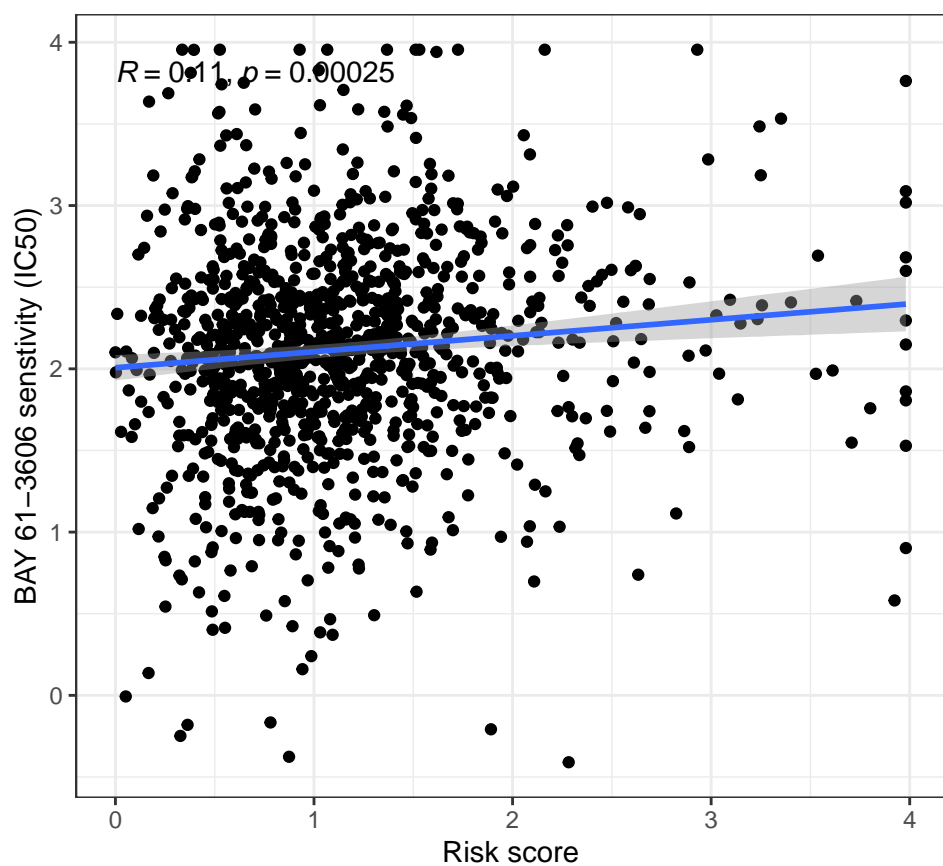

Supplement: s1 [file s1]

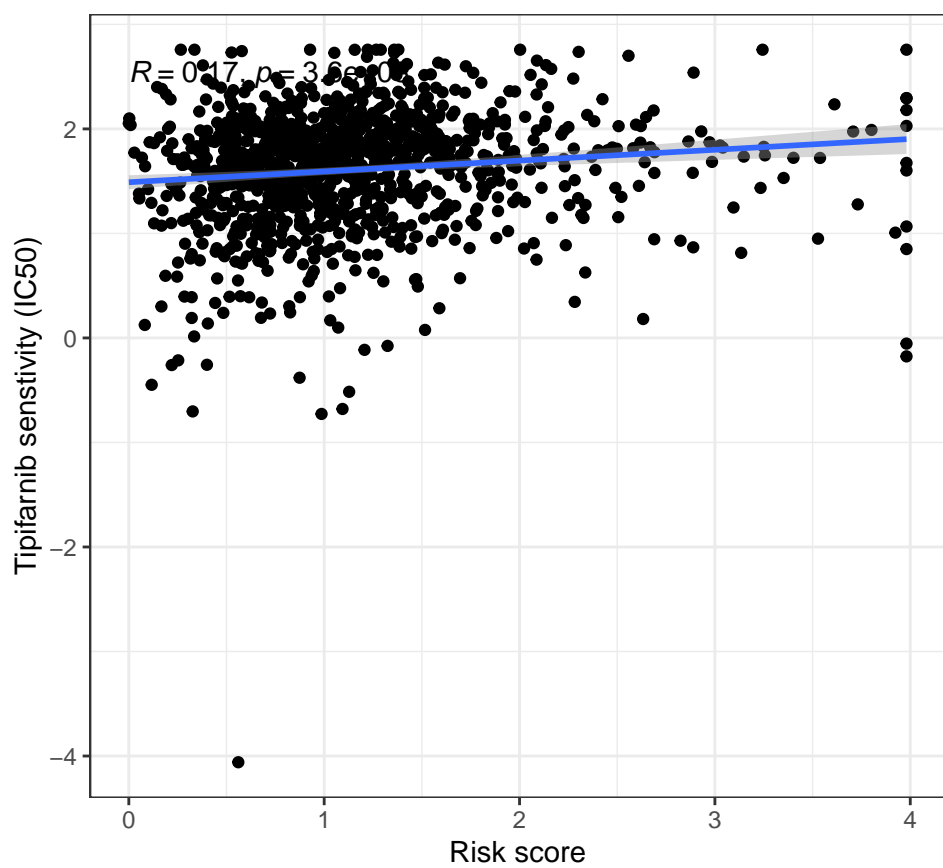

Supplement: s1 [file s1]

Risk  low  high

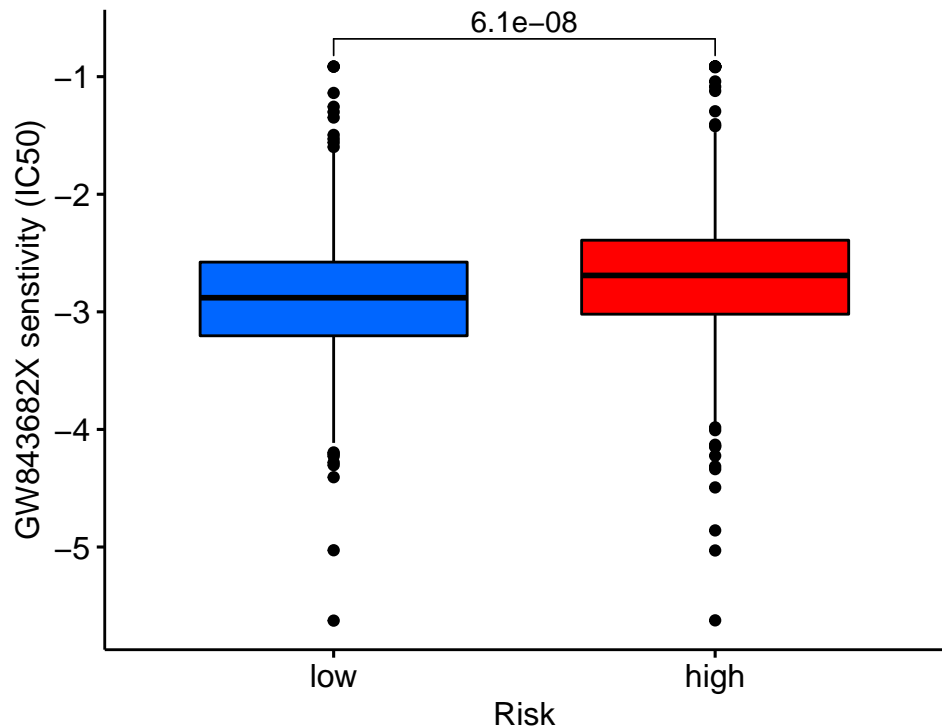

Supplement: s1 [file s1]

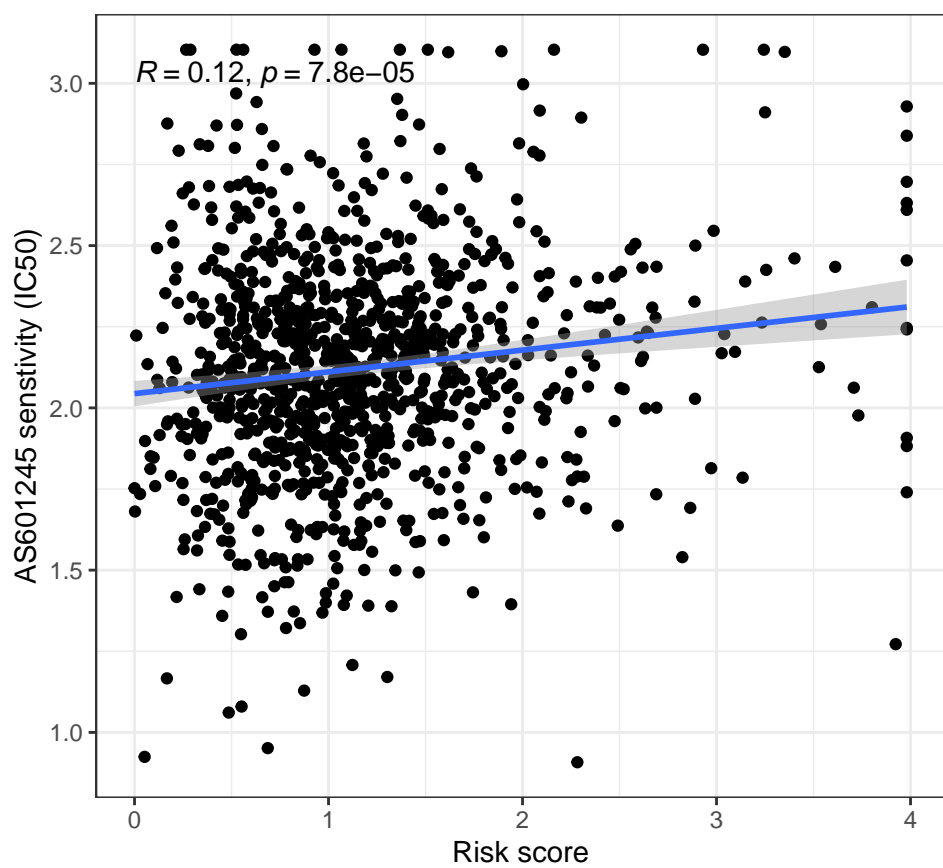

Supplement: s1 [file s1]

Risk  low  high

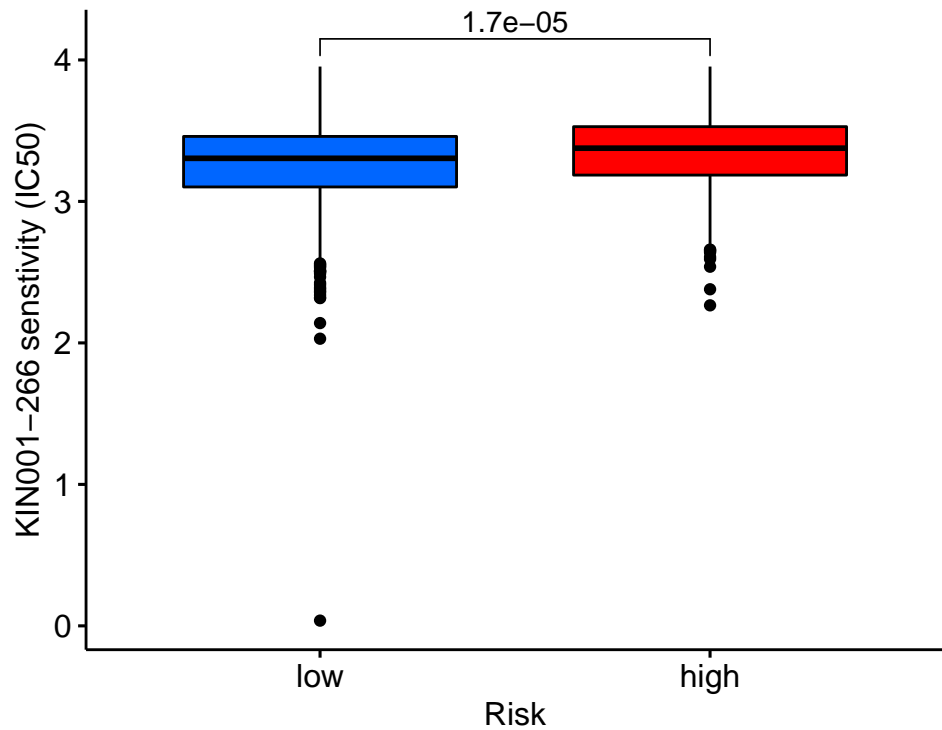

Supplement: s1 [file s1]

Risk low high

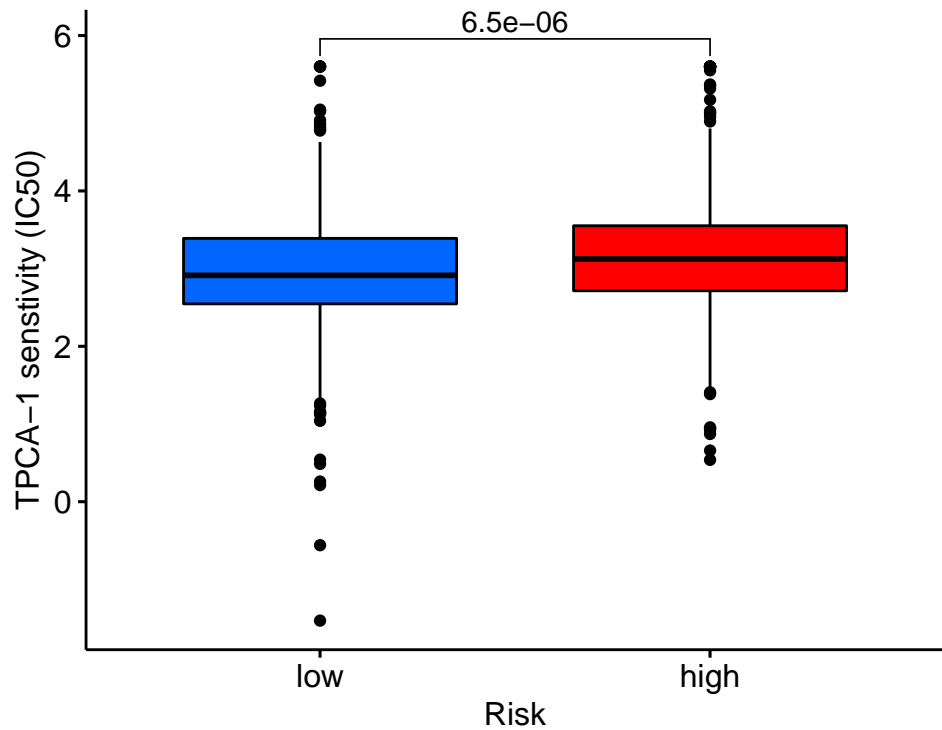

Supplement: s1 [file s1]

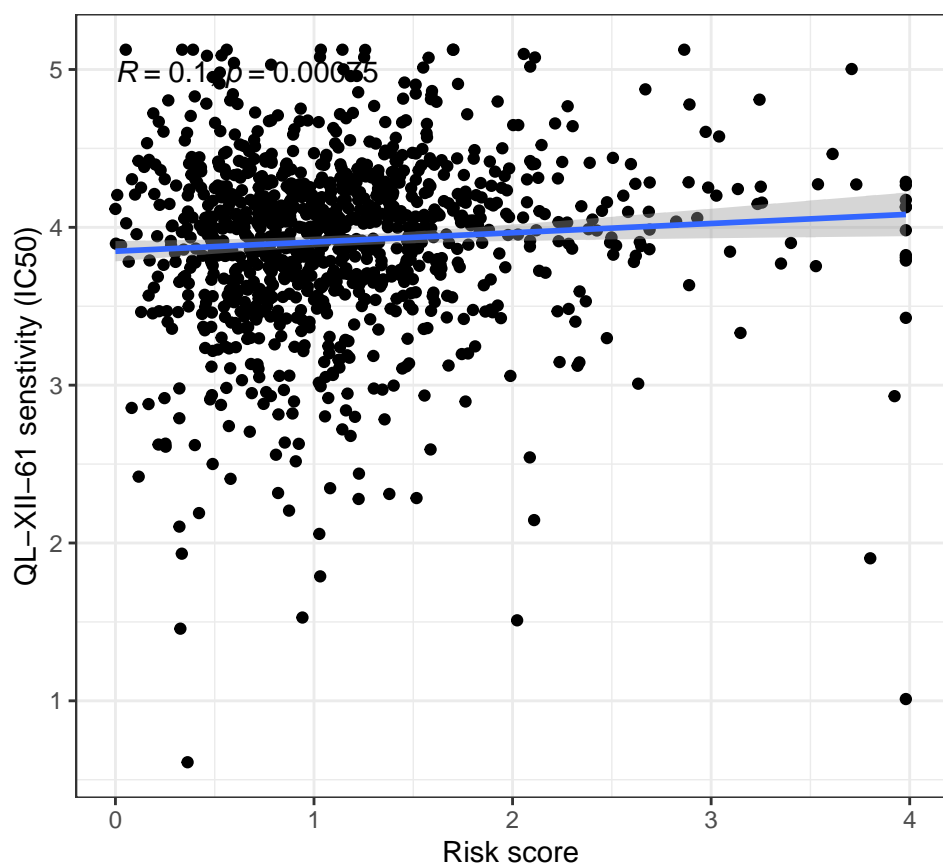

Supplement: s1 [file s1]

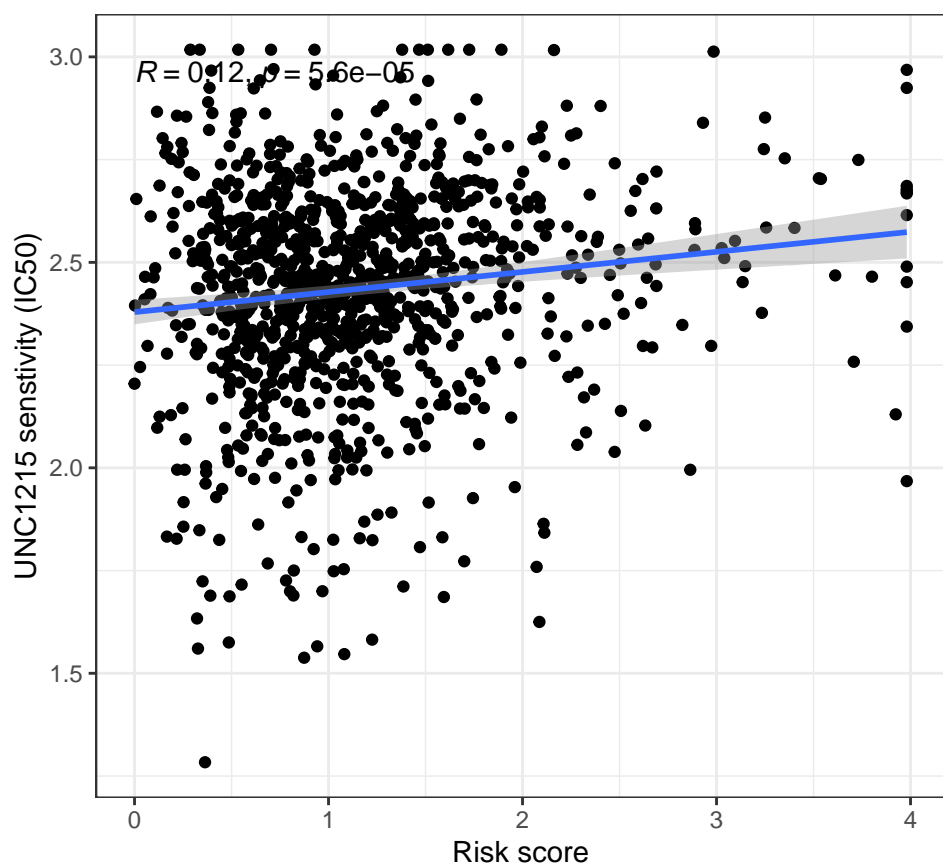

Supplement: s1 [file s1]

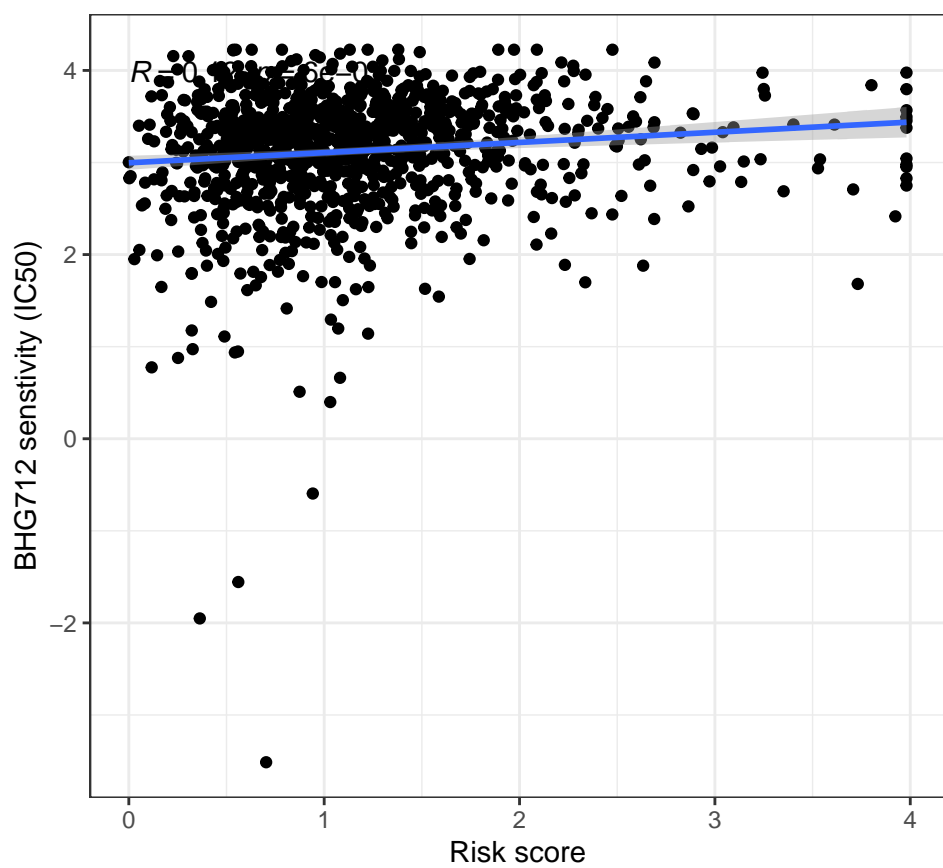

Supplement: s1 [file s1]

Risk  low  high

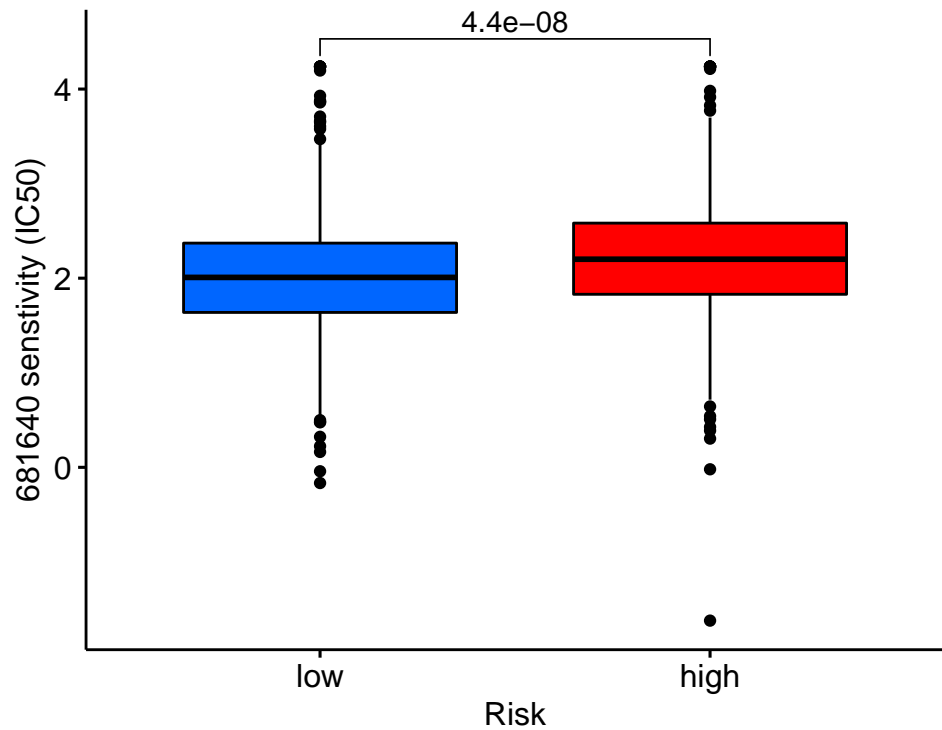

Supplement: s1 [file s1]

Risk  low  high

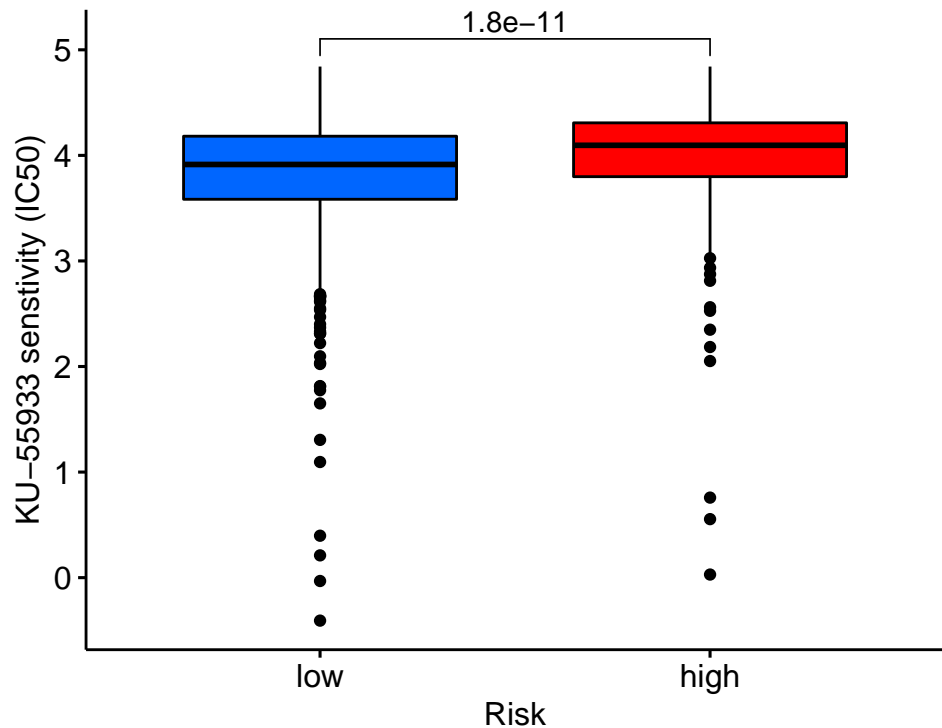

Supplement: s1 [file s1]

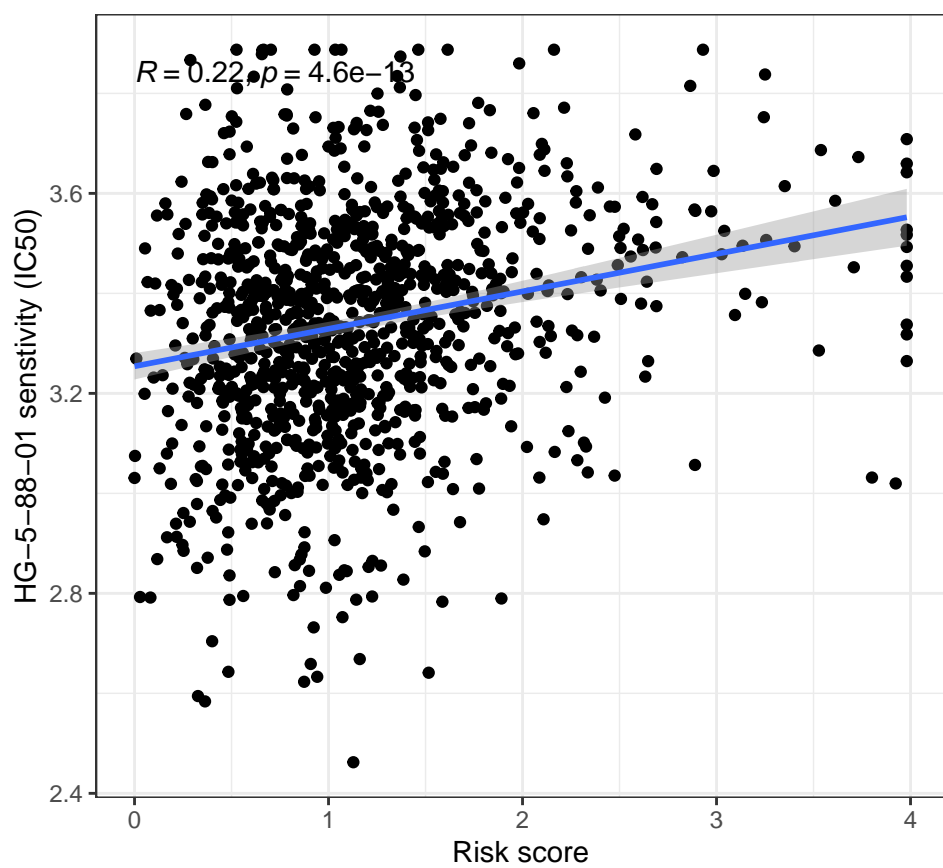

Supplement: s1 [file s1]

Risk  low  high

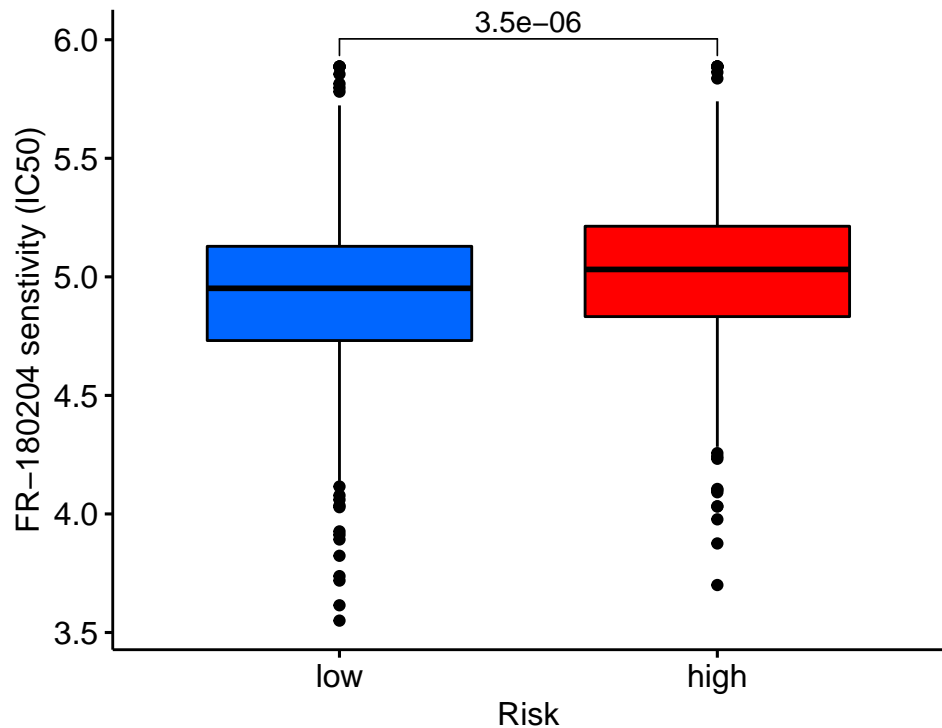

Supplement: s1 [file s1]

Risk  low  high

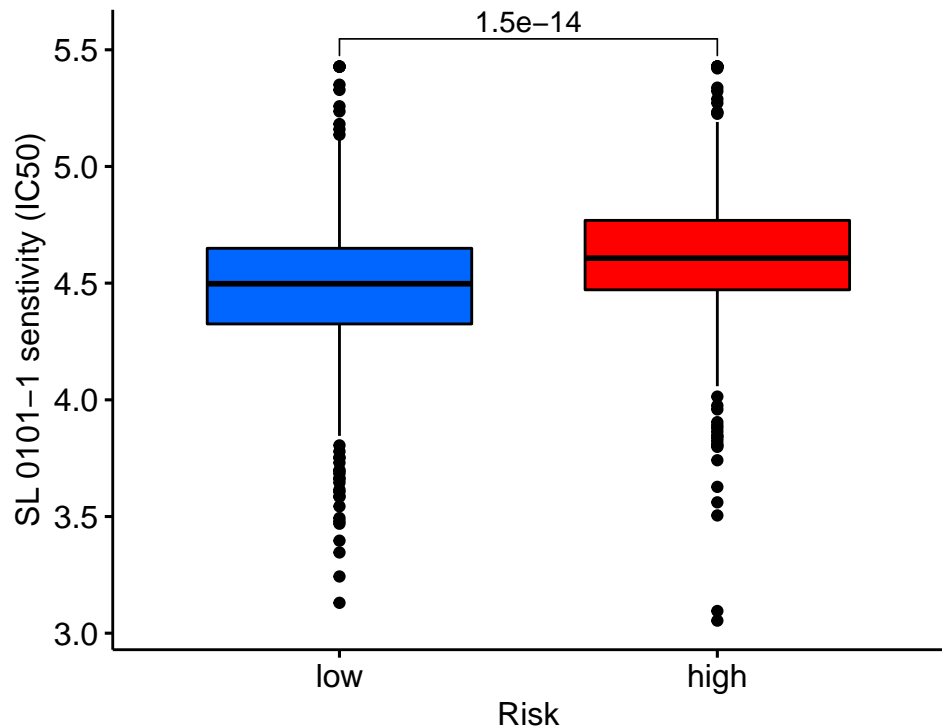

Supplement: s1 [file s1]

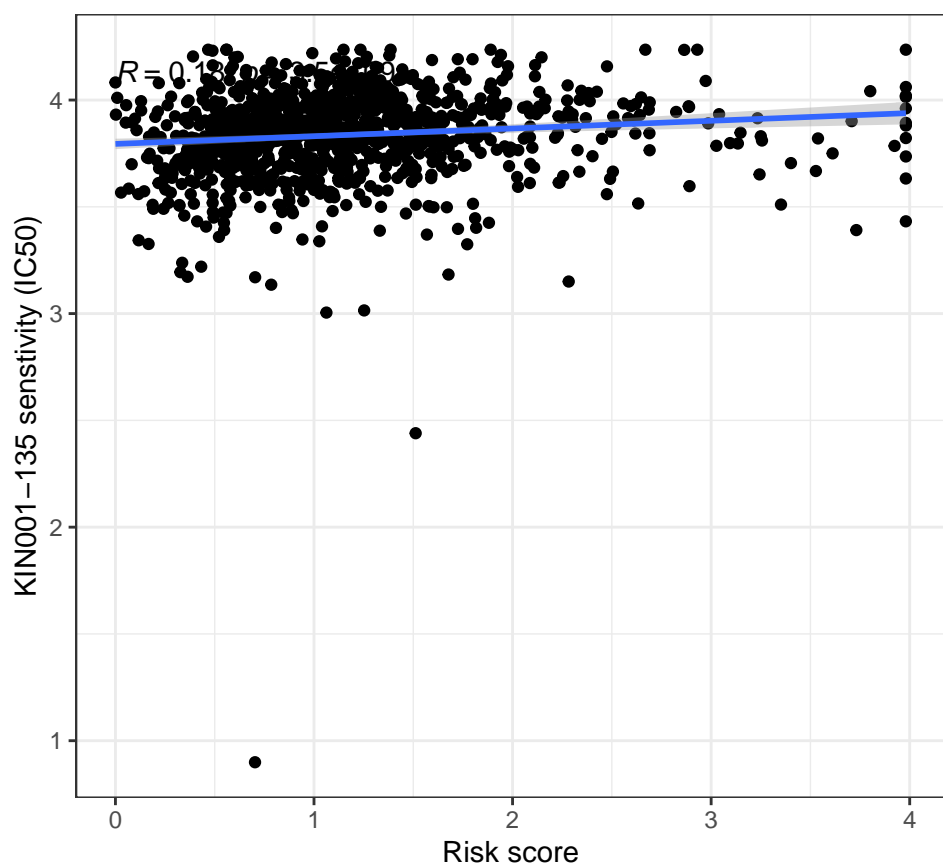

Supplement: s1 [file s1]

Risk  low  high

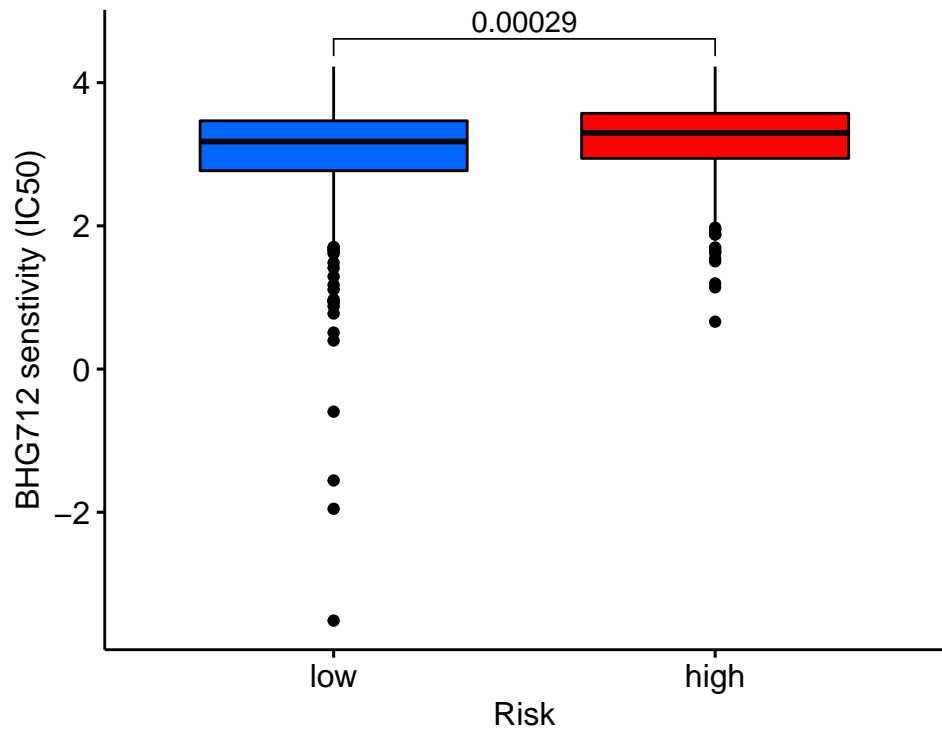

Supplement: s1 [file s1]

Risk  low  high

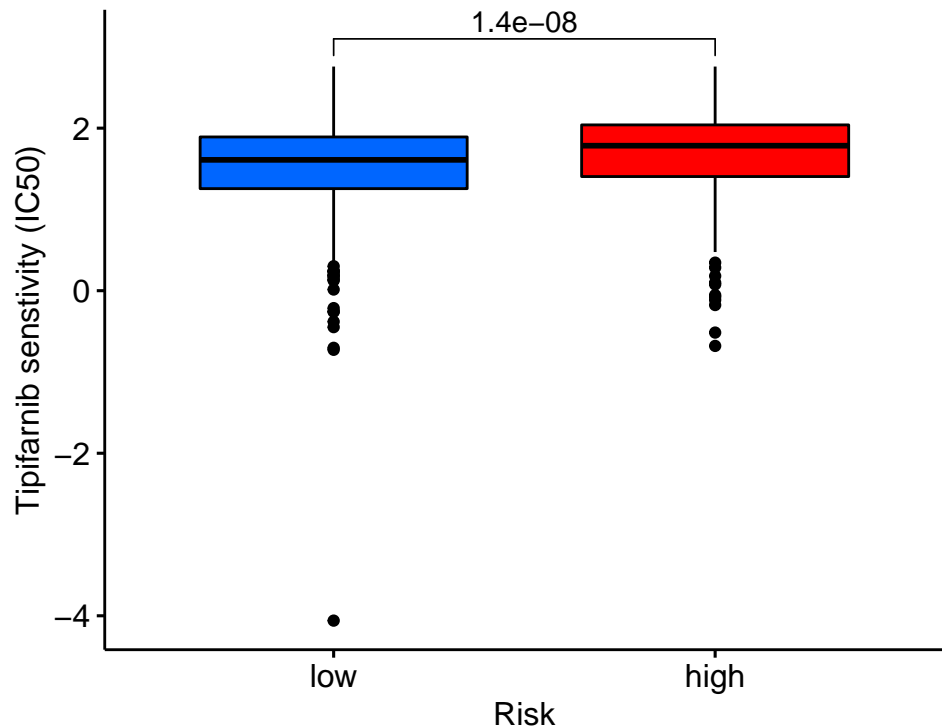

Supplement: s1 [file s1]

Risk  low  high

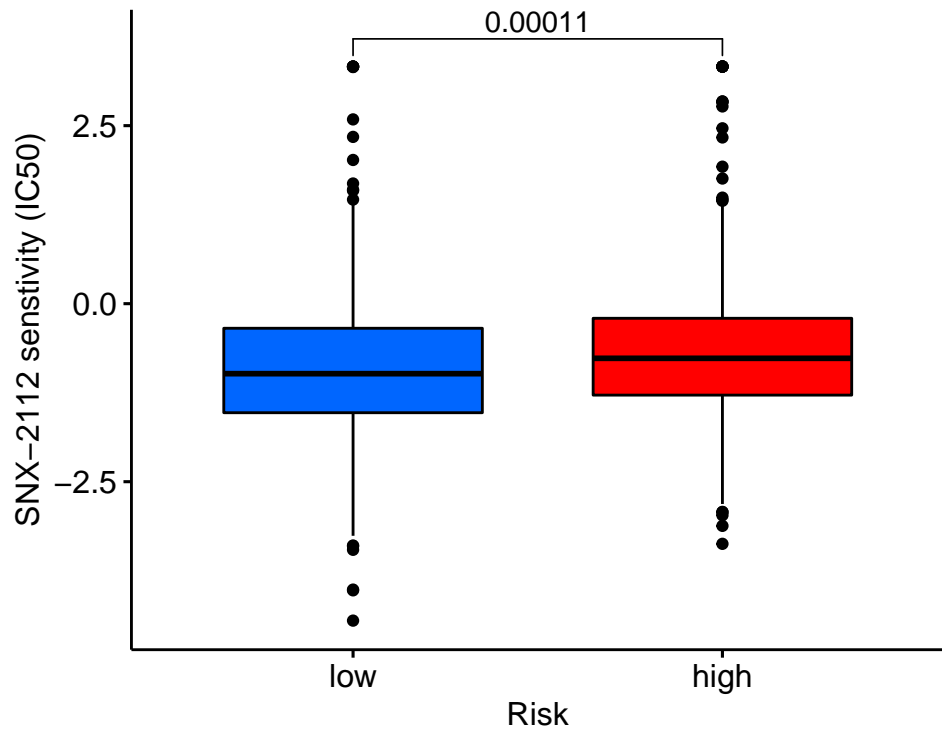

Supplement: s1 [file s1]

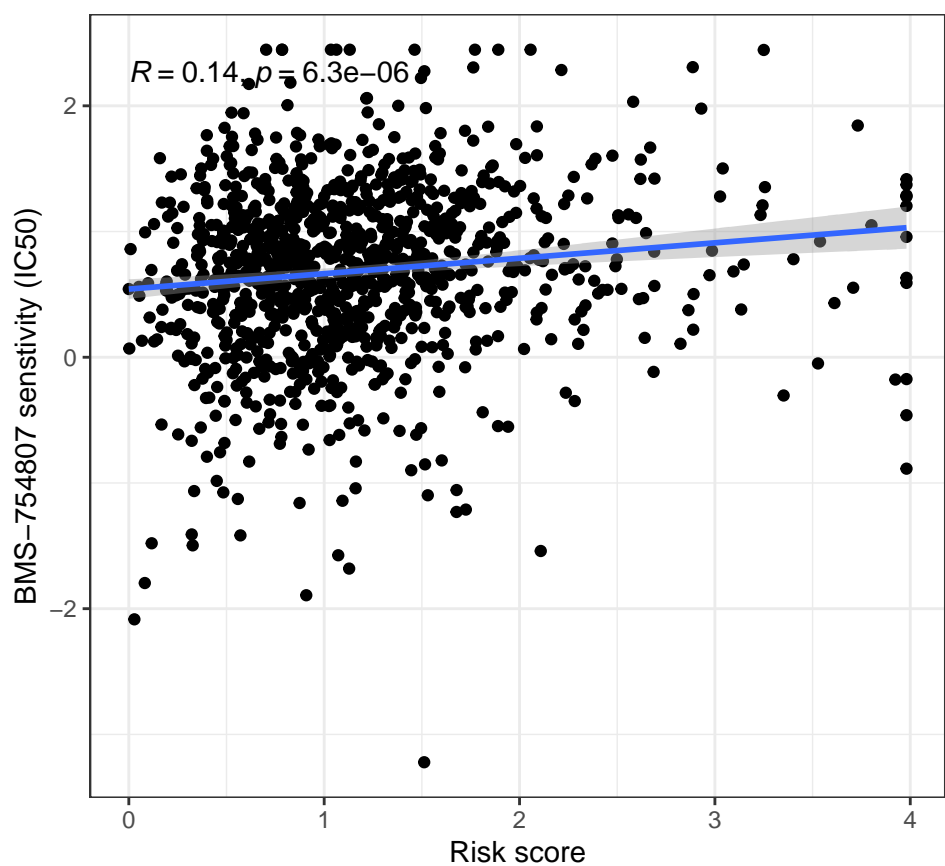

Supplement: s1 [file s1]

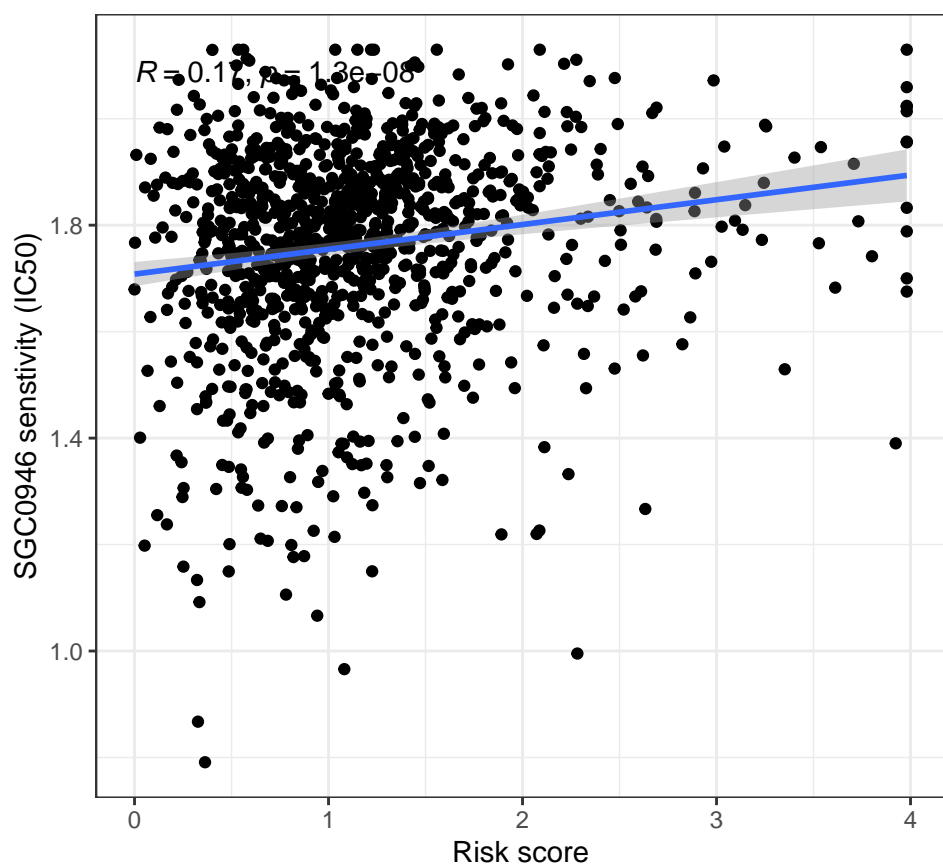

Supplement: s1 [file s1]

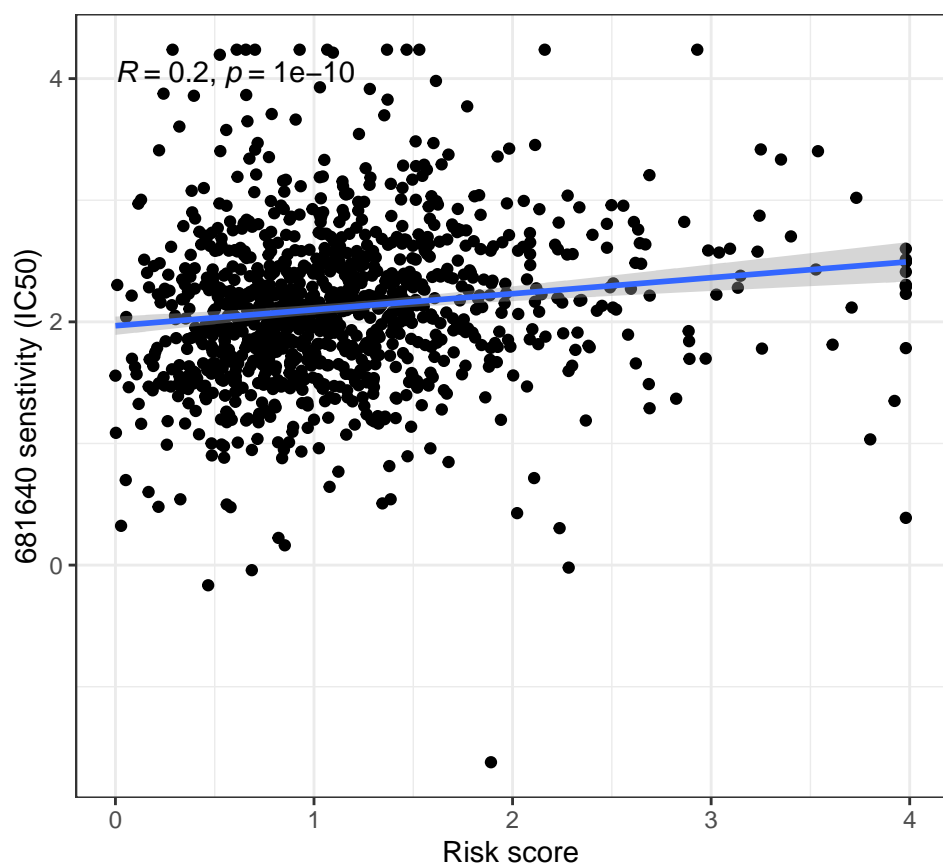

Supplement: s1 [file s1]

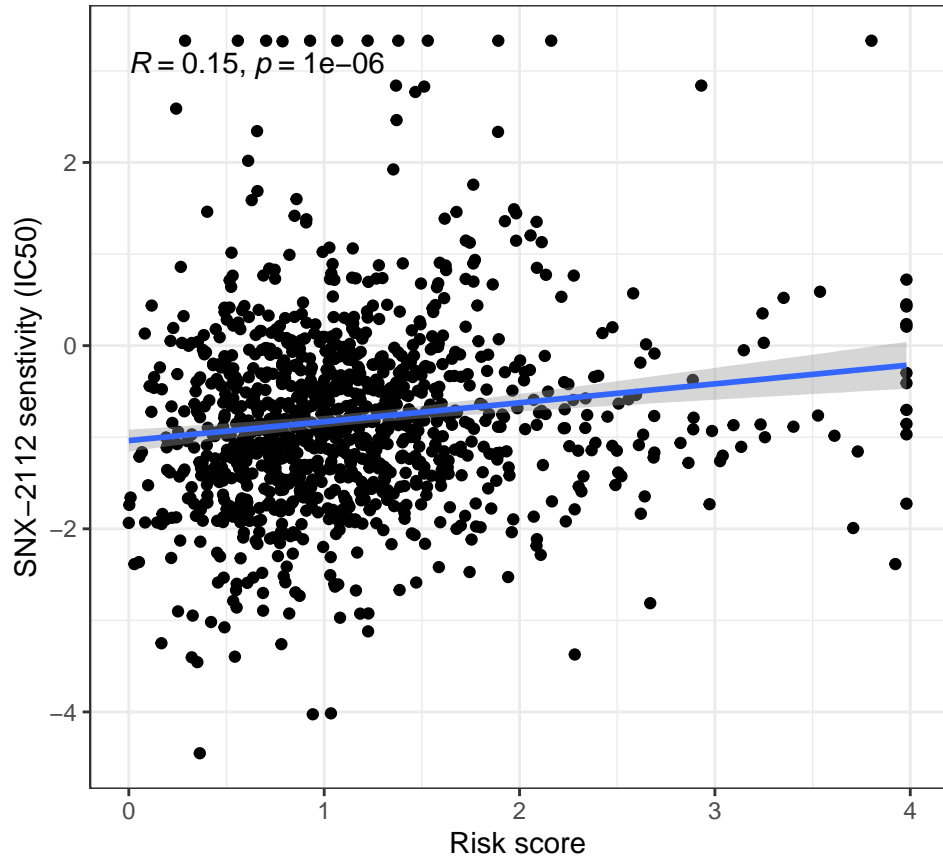

Supplement: s1 [file s1]

Risk  low  high

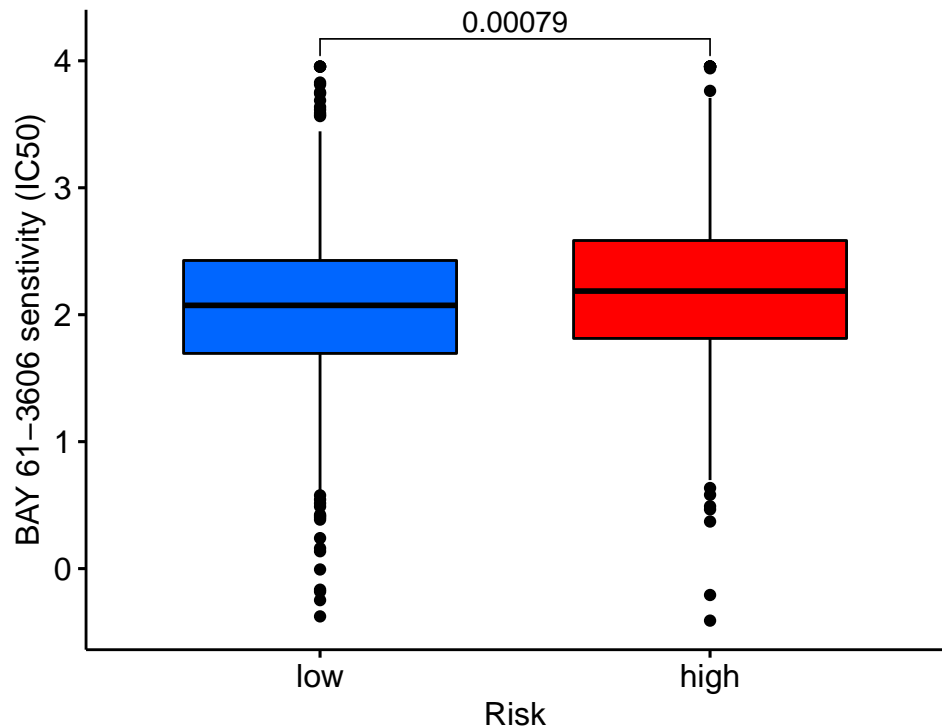

Supplement: s1 [file s1]

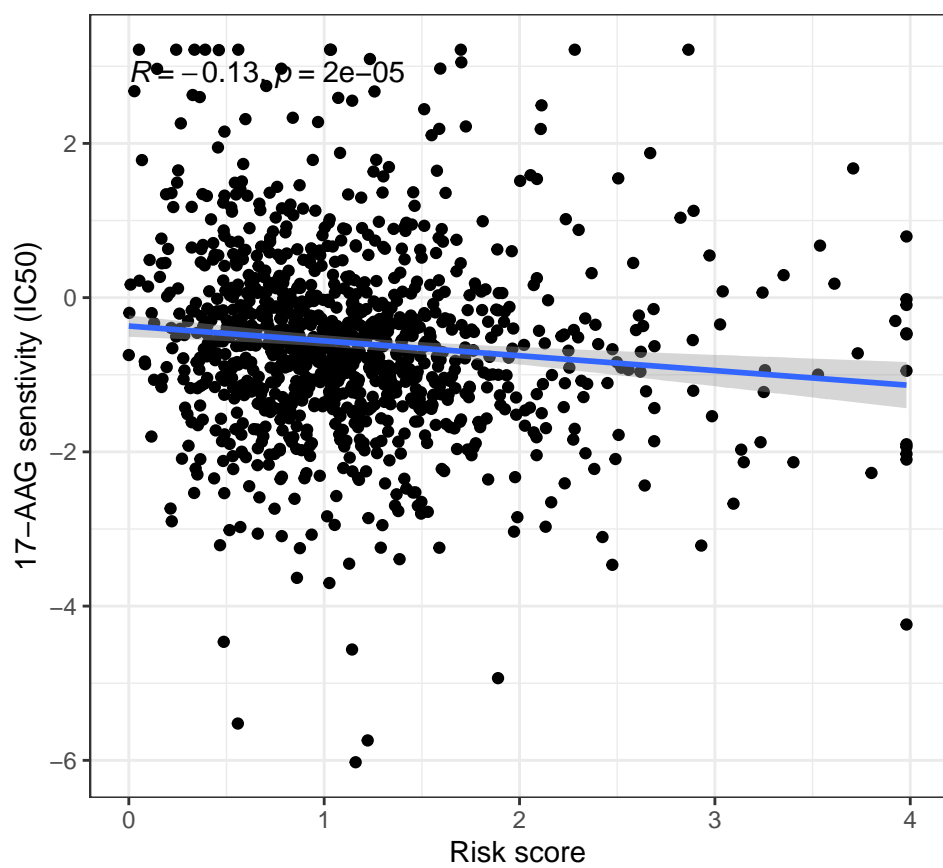

Supplement: s1 [file s1]

Risk  low  high

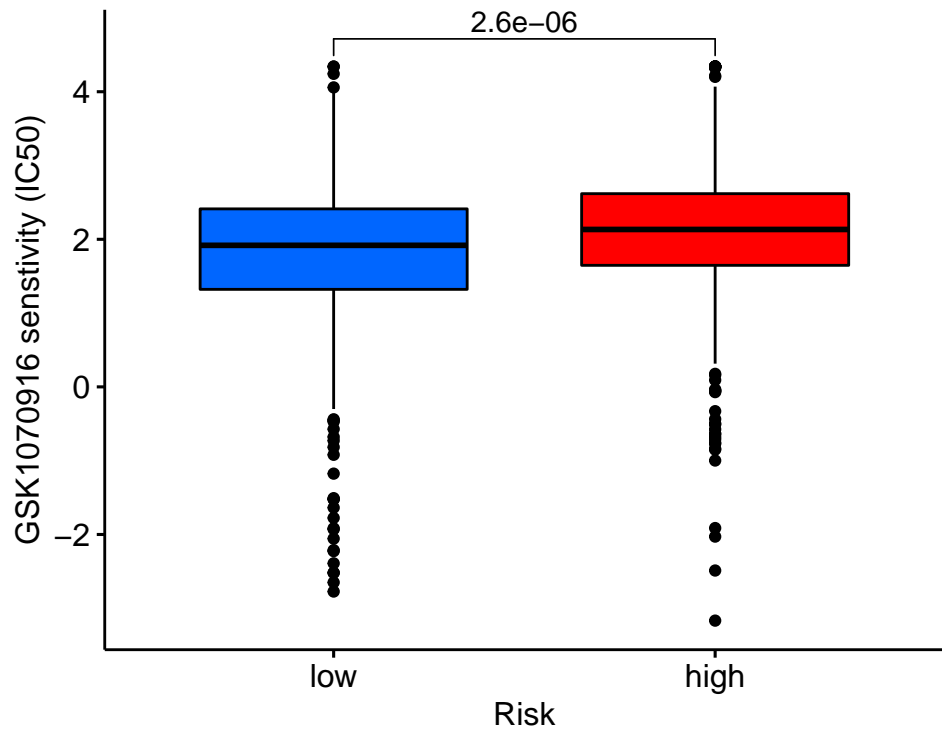

Supplement: s1 [file s1]

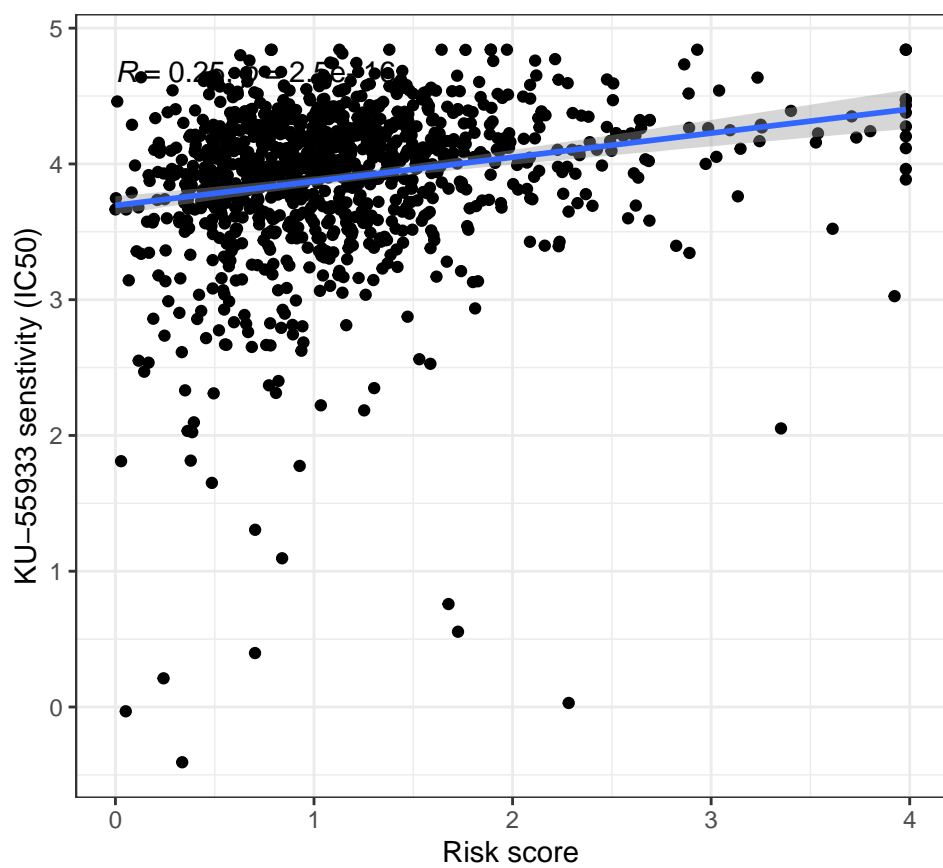

Supplement: s1 [file s1]

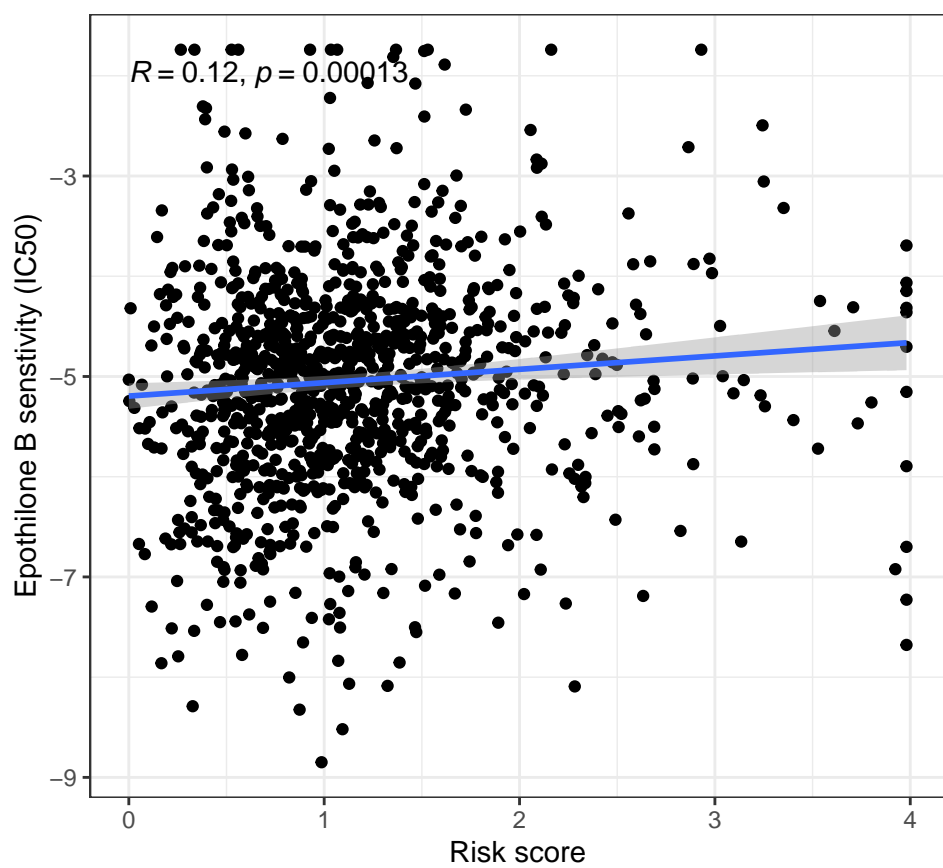

Supplement: s1 [file s1]

Risk  low  high

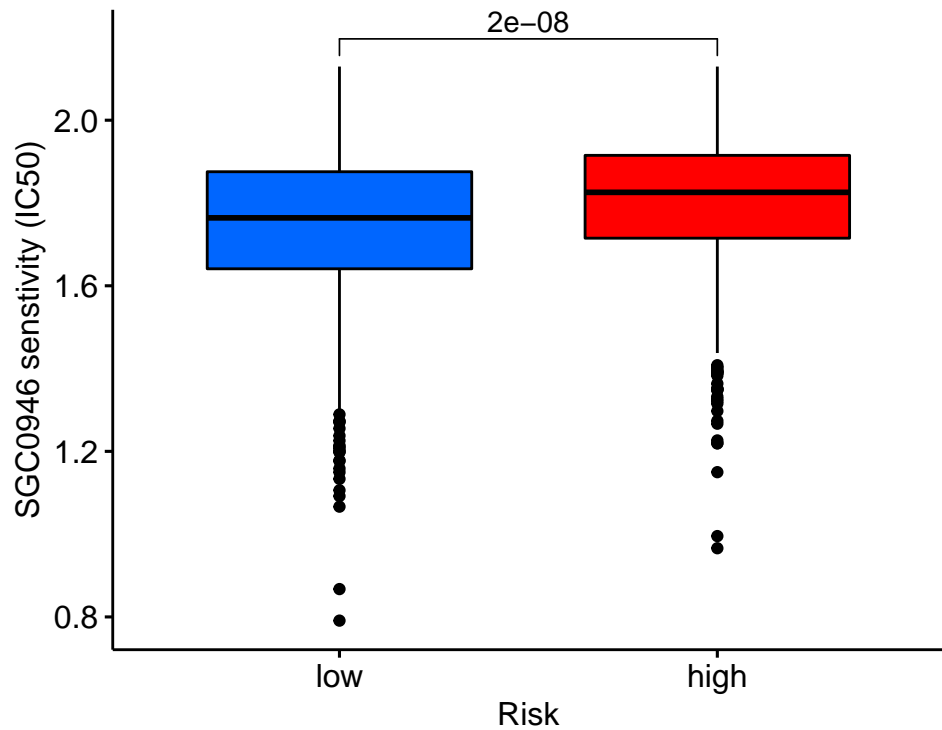

Supplement: s1 [file s1]

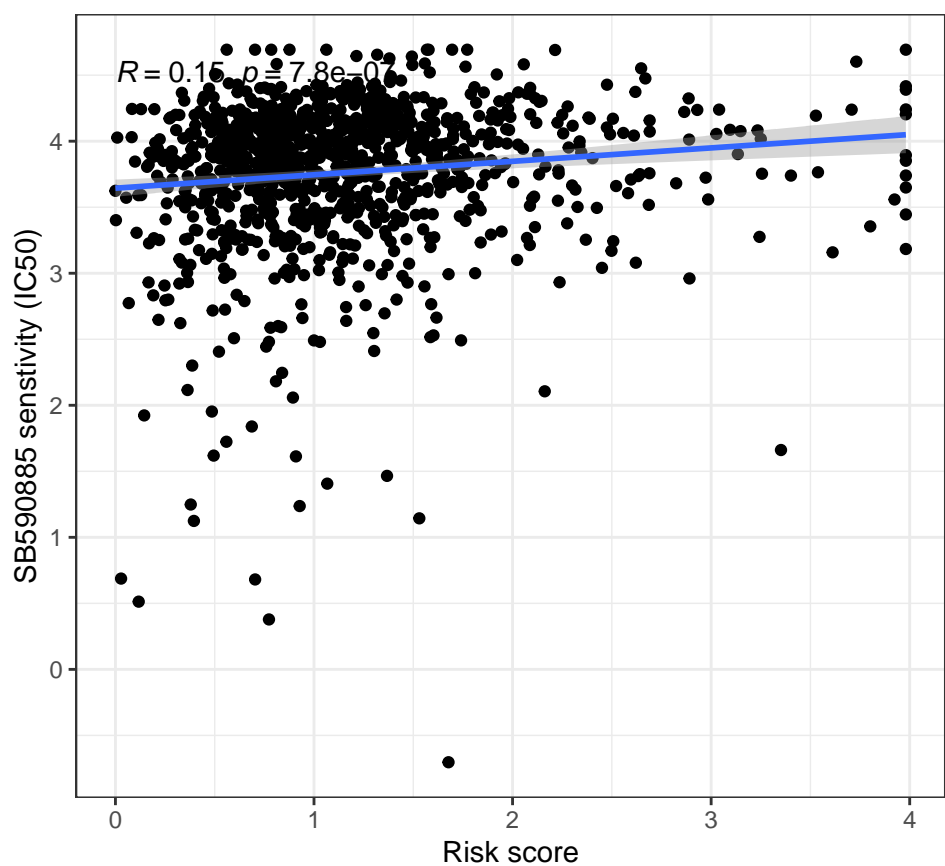

Supplement: s1 [file s1]

Risk  low  high

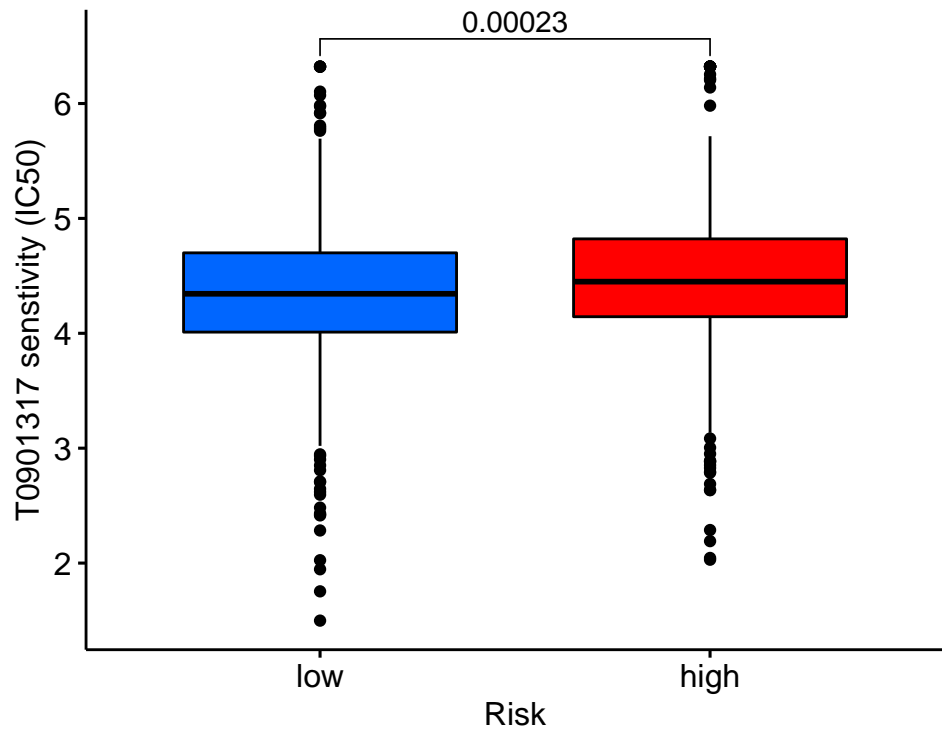

Supplement: s1 [file s1]

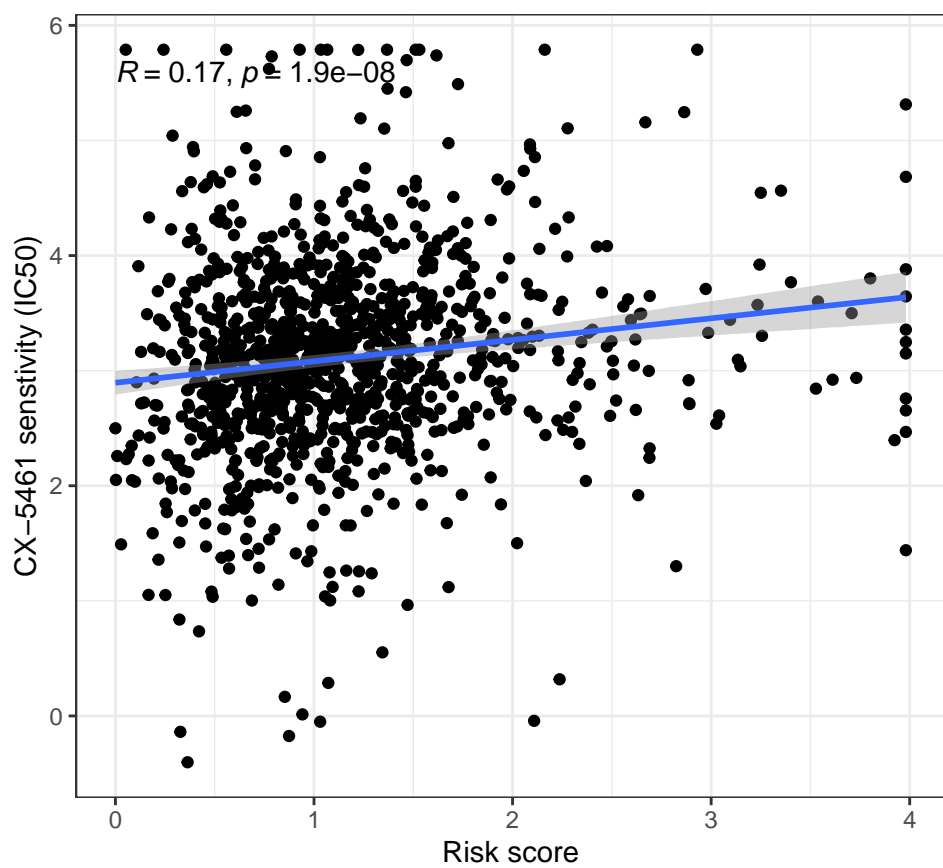

Supplement: s1 [file s1]

Risk  low  high

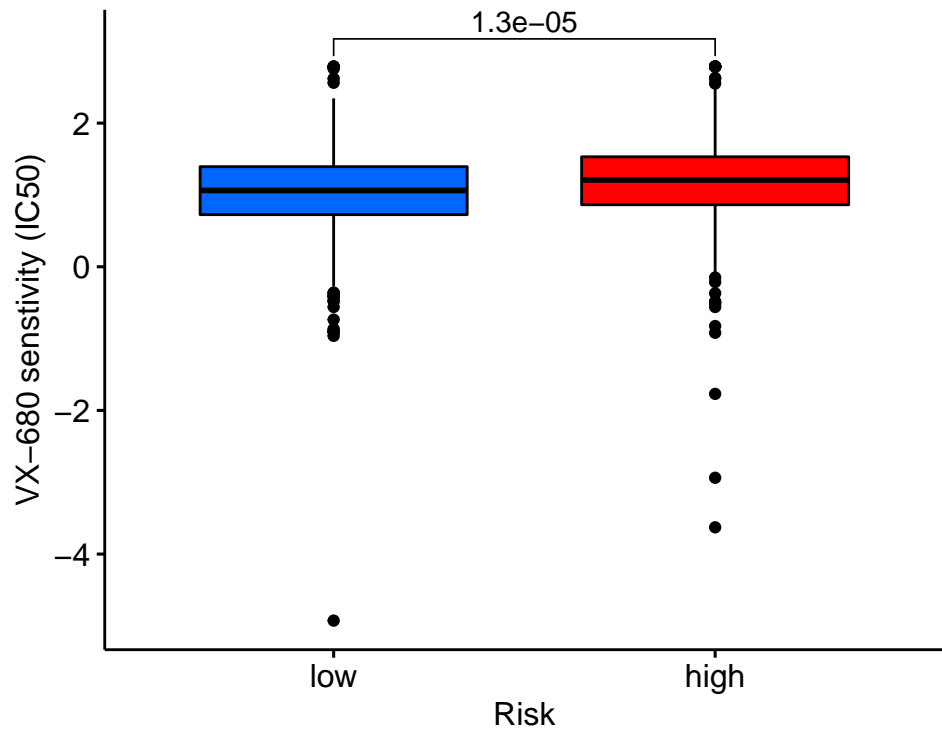

Supplement: s1 [file s1]

Risk  low  high

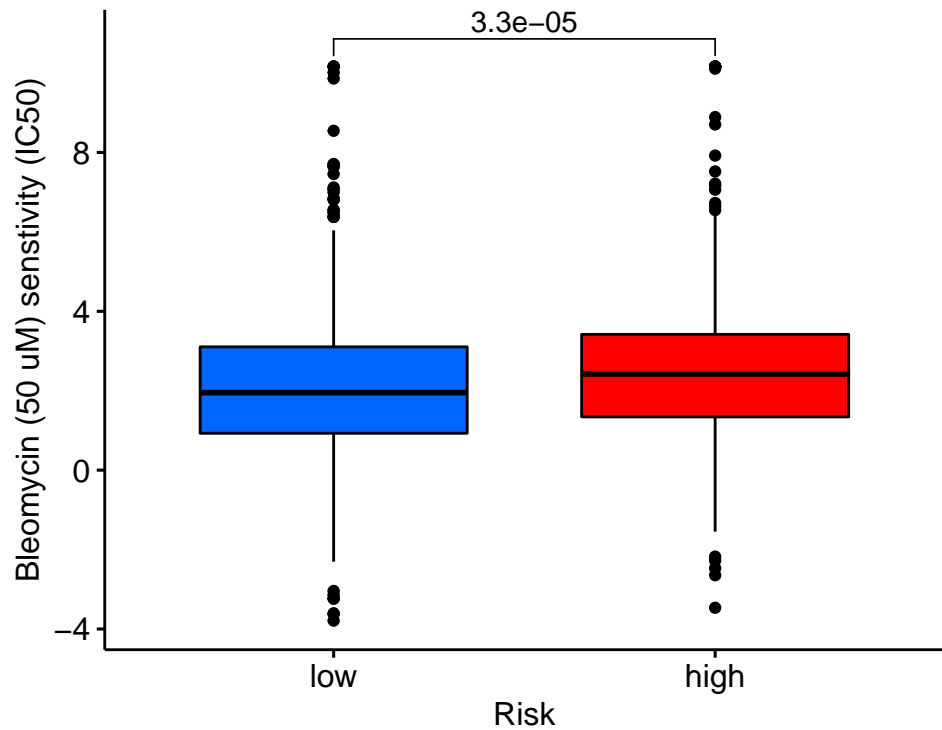

Supplement: s1 [file s1]

Risk  low  high

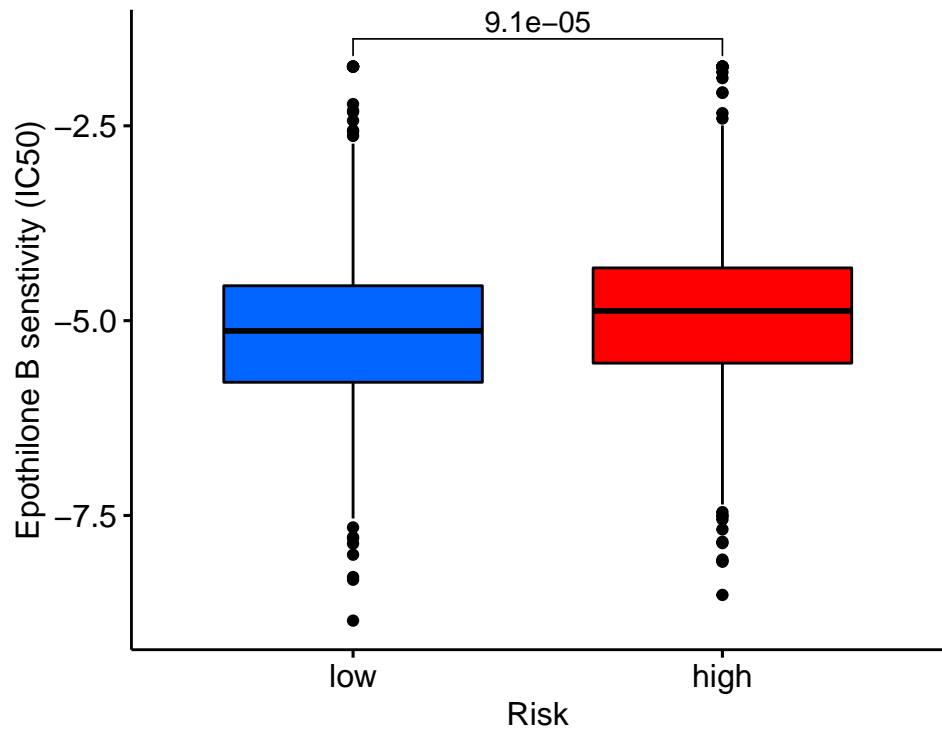

Supplement: s1 [file s1]

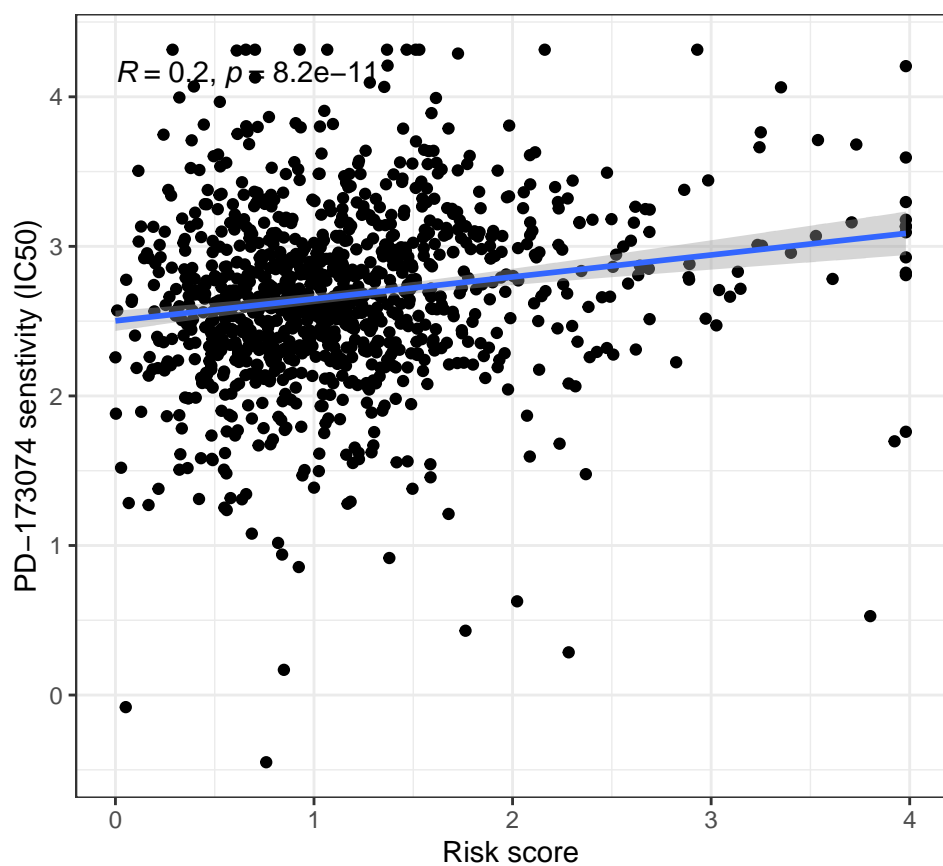

Supplement: s1 [file s1]

Ispinesib Mesylate sensitivity (IC50)

$R = 0.16$ ,  $p = 1.5e-07$

0

1

2

3

4

Risk score

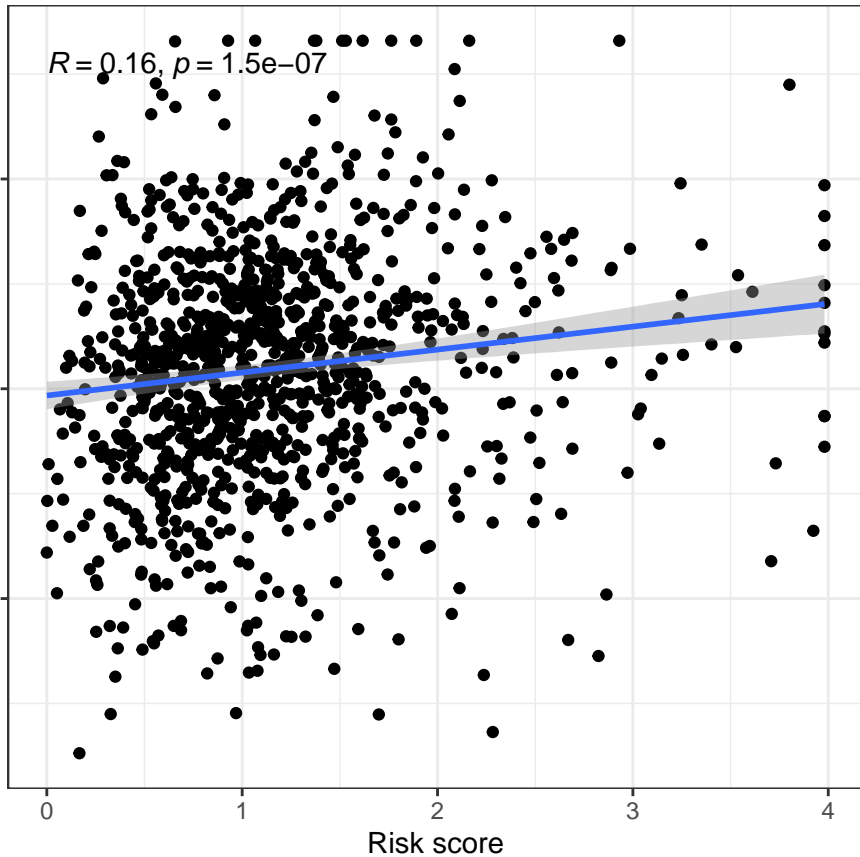

Supplement: s1 [file s1]

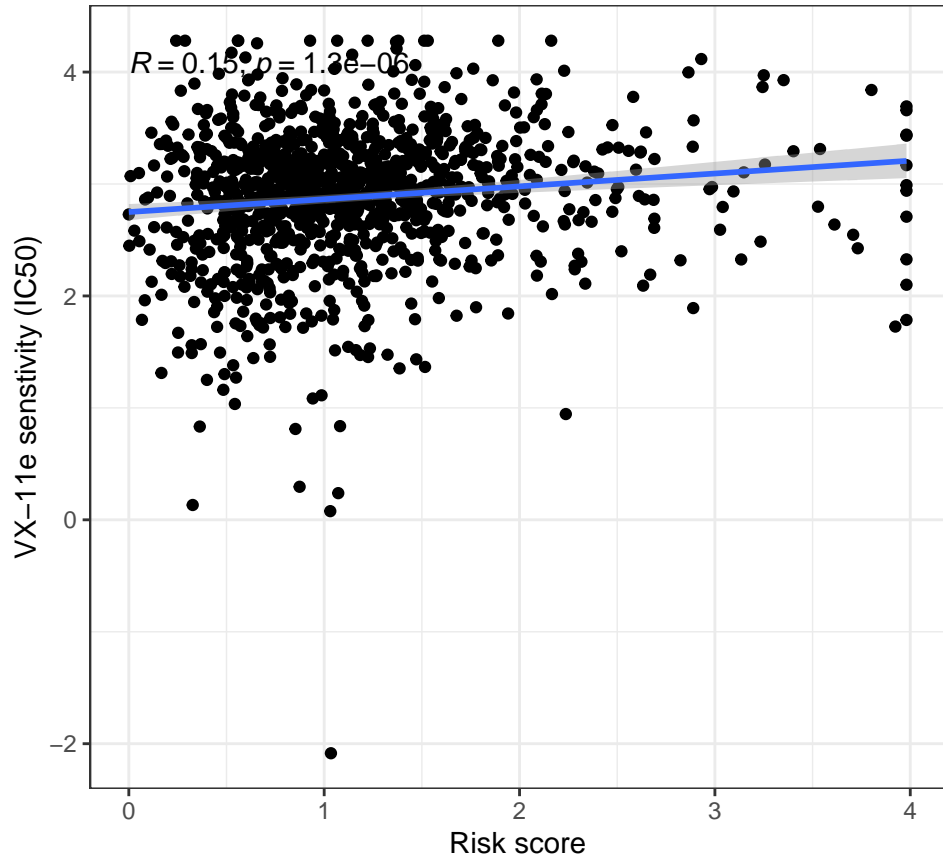

Supplement: s1 [file s1]

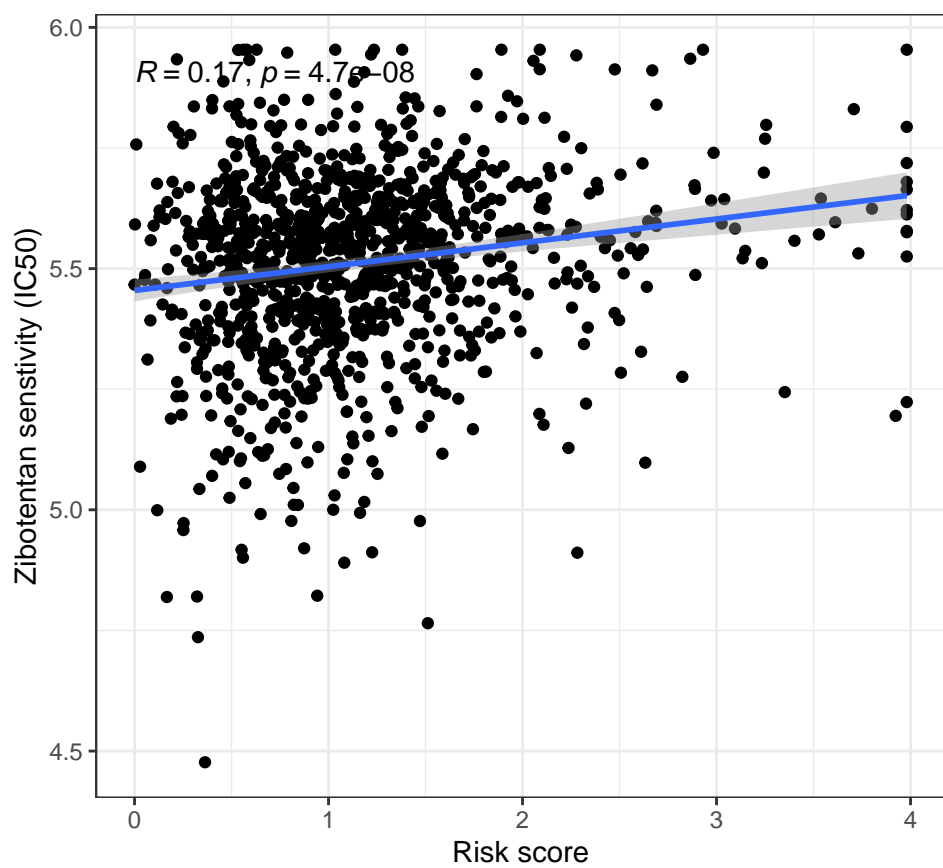

Supplement: s1 [file s1]

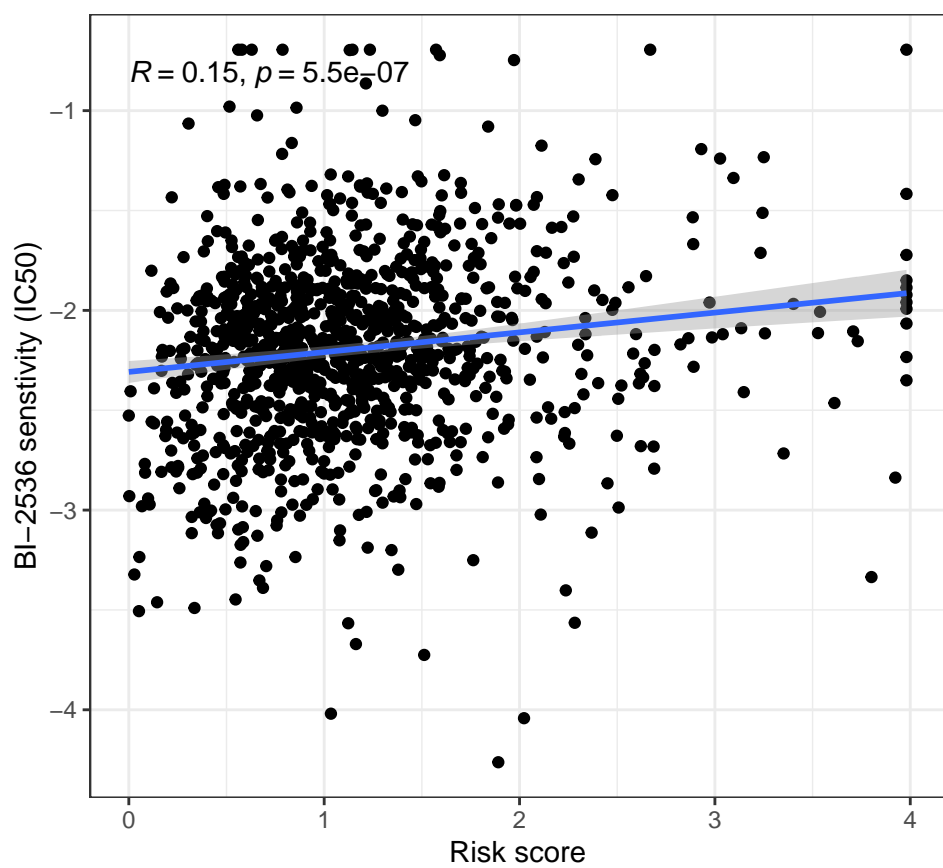

Supplement: s1 [file s1]

Risk  low  high

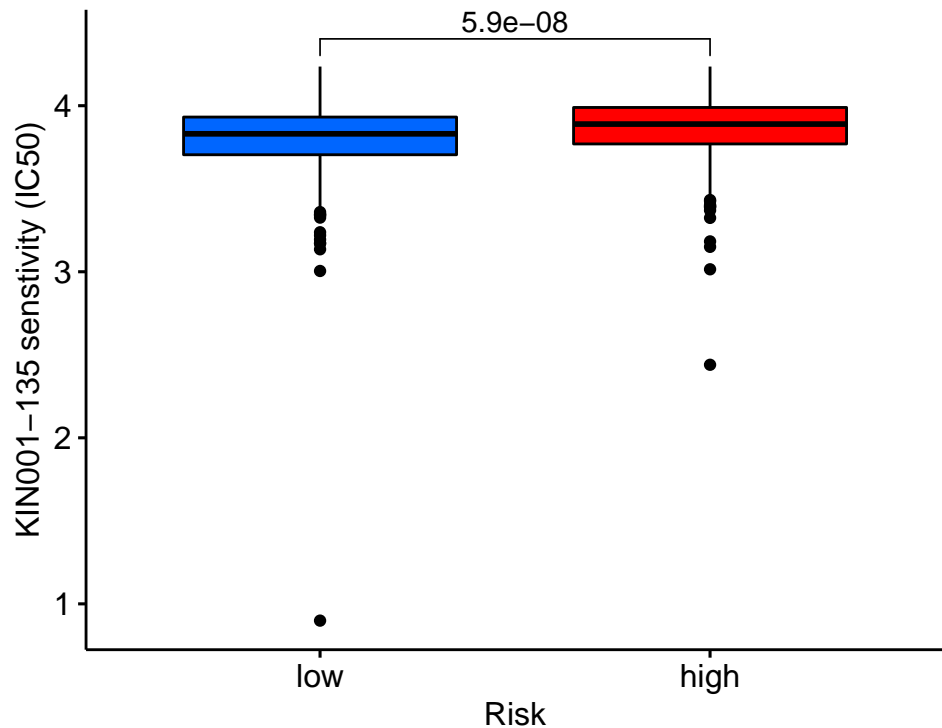

Supplement: s1 [file s1]

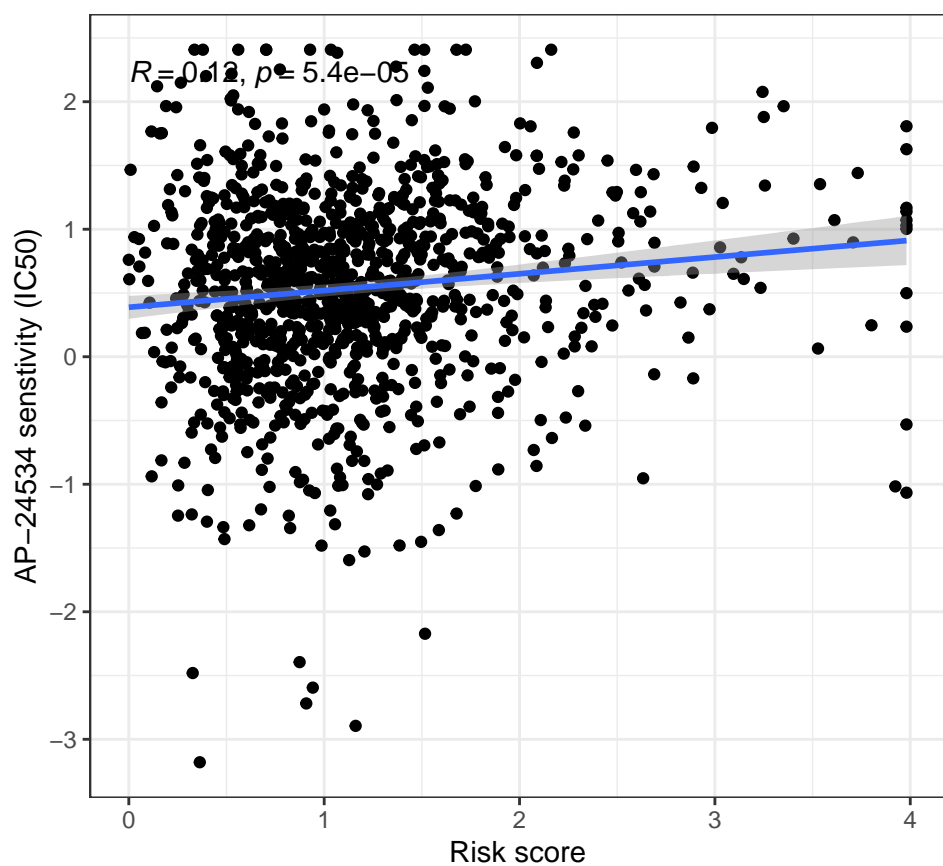

Supplement: s1 [file s1]

BX-795 sensitivity (IC50)

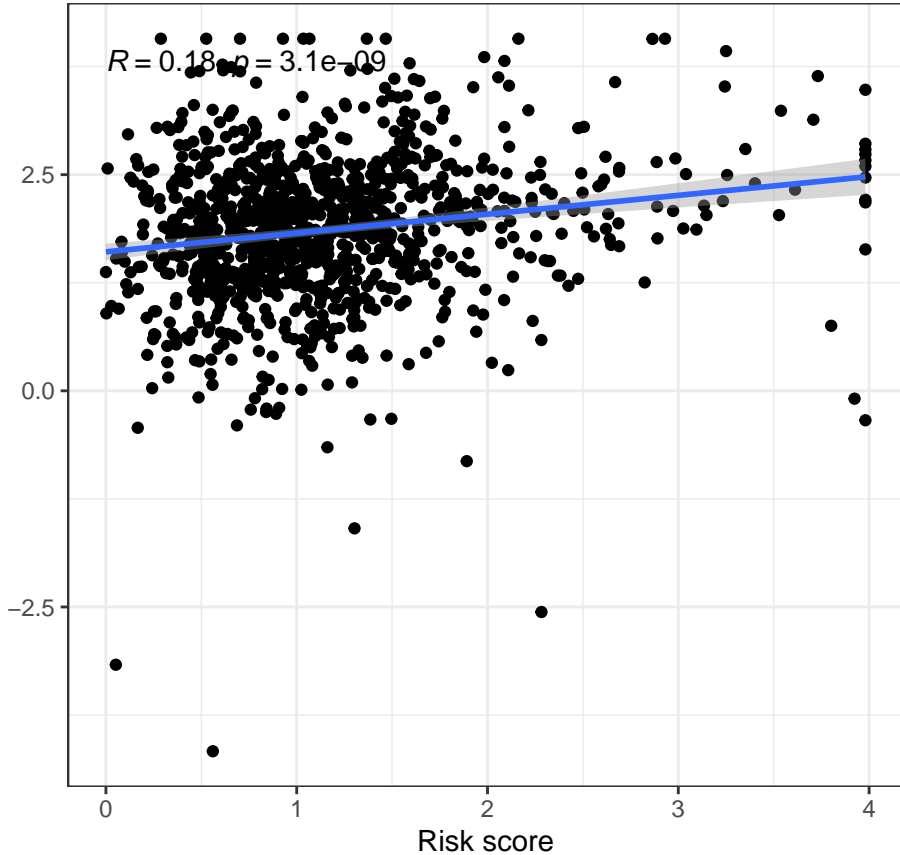

Supplement: s1 [file s1]

Risk  low  high

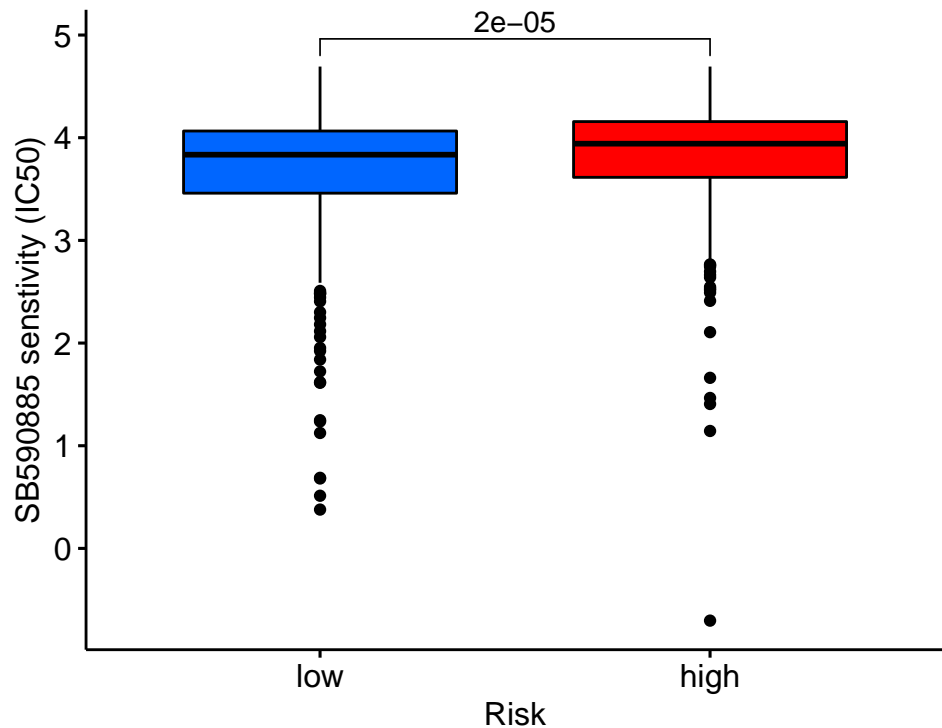

Supplement: s1 [file s1]

Risk  low  high

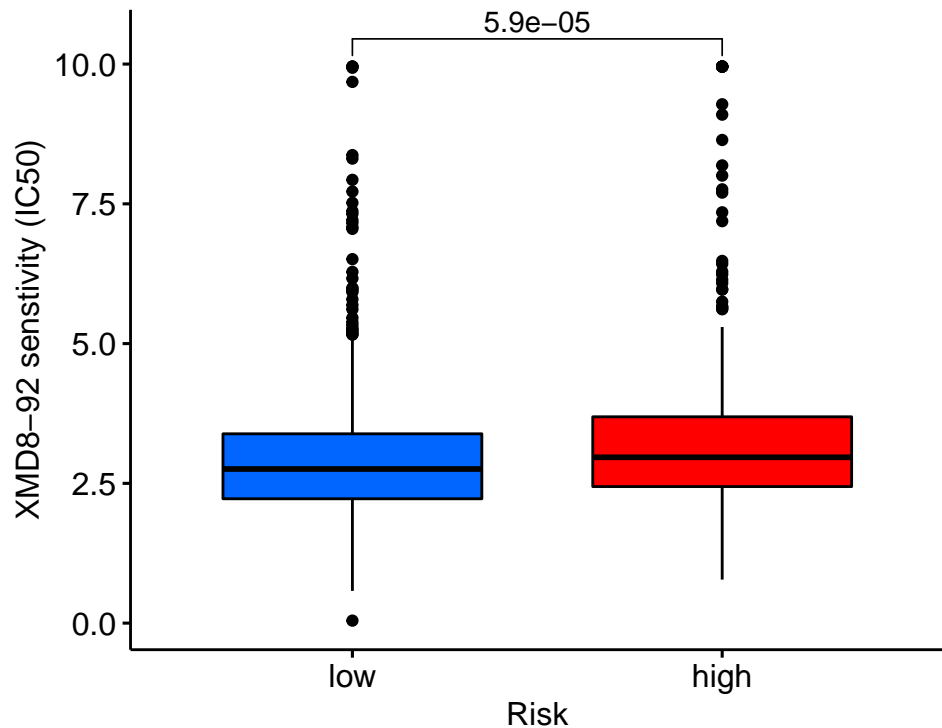

Supplement: s1 [file s1]

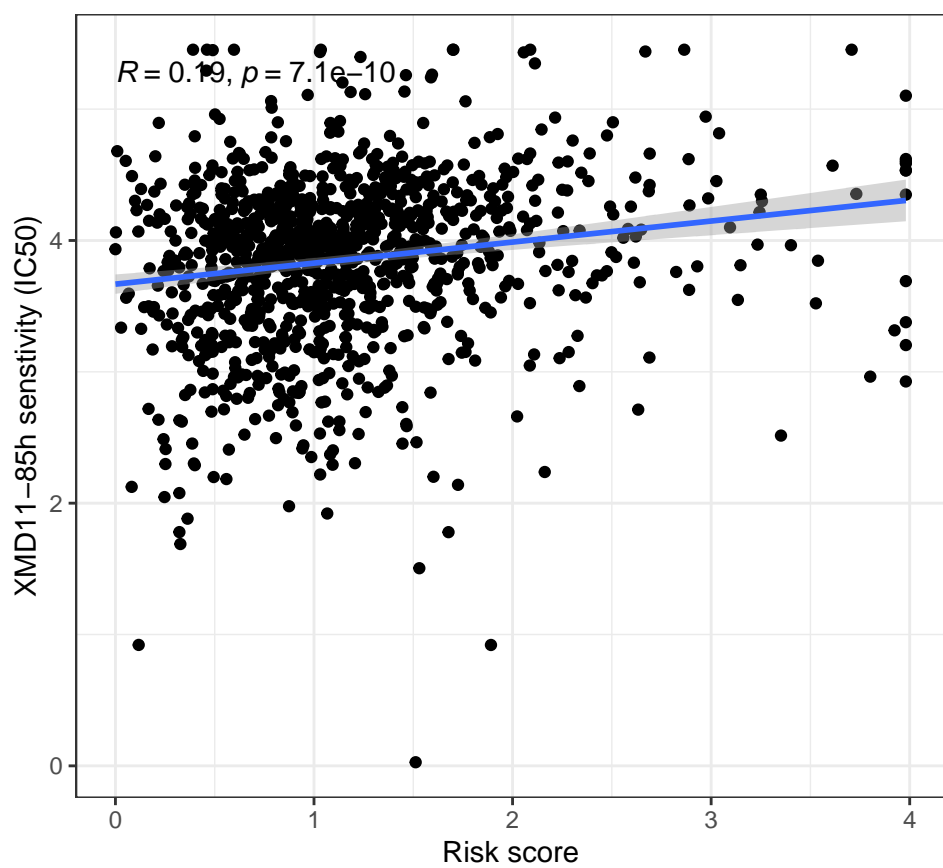

Supplement: s1 [file s1]

Risk  low  high

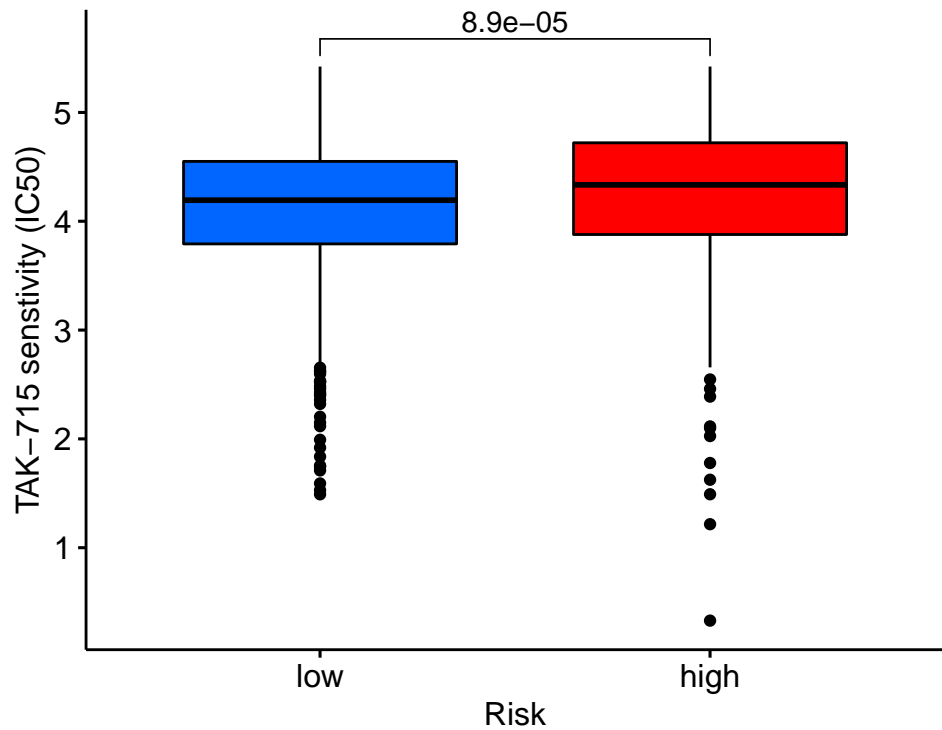

Supplement: s1 [file s1]

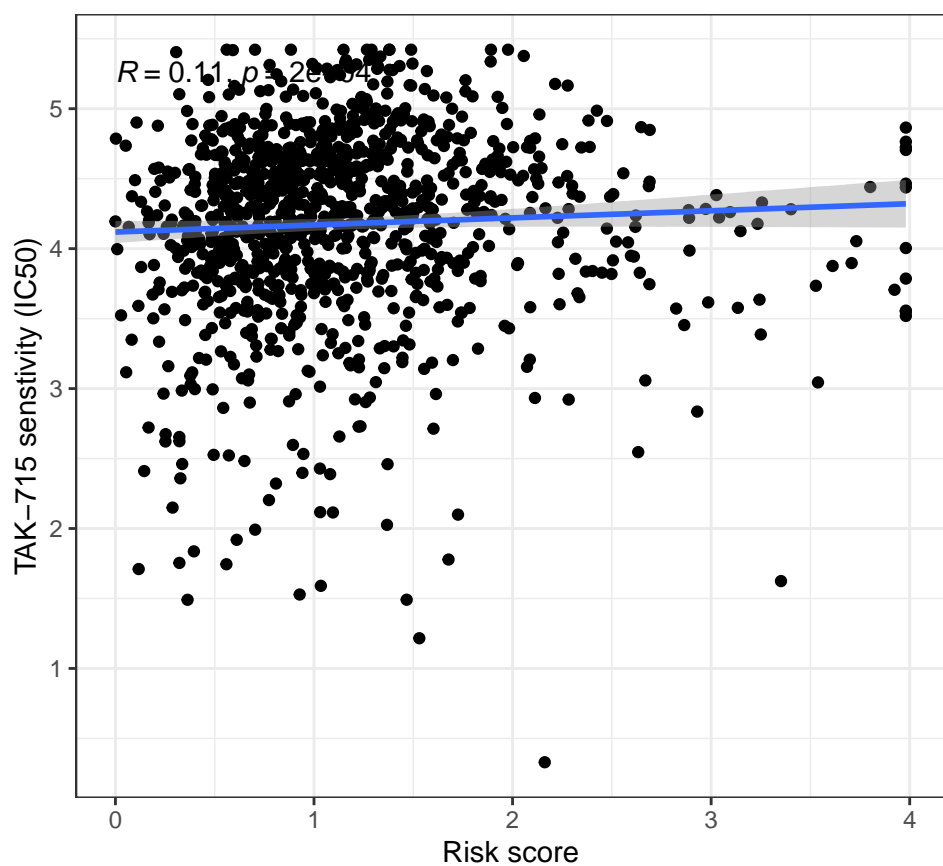

Supplement: s1 [file s1]

Risk  low  high

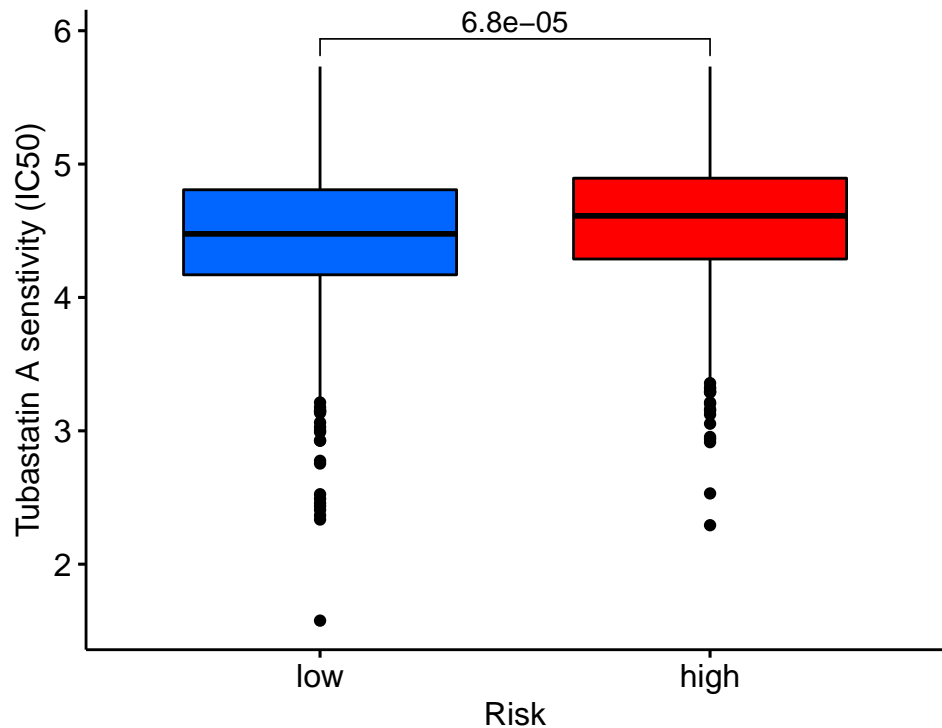

Supplement: s1 [file s1]
